# Supplementary material for: A stochastic framework of neurogenesis underlies the assembly of neocortical cytoarchitecture
Source: eLife. 2019 Nov 18;8:e51381. doi: 10.7554/eLife.51381 (PMC6968929; doi:10.7554/eLife.51381)
Supplement: Figure 1—source data 1. [file elife-51381-fig1-data1.xlsx]

## Sheet: E9.5
LINEAGE ID	SECTIONS	AREA	II/III	IV	V	VI	TOT	LINEAGE TYPE	Layers
GC1007_1	23-30	M2	92	41	78	82	293	TRANSLAMINAR	II/III to VI
GC1006_1	26-32	SS	69	65	23	62	219	TRANSLAMINAR	II/III to VI
GC1006_2	33-38	SS2	24	22	8	27	81	TRANSLAMINAR	II/III to VI
GC1006_3	36-40	SS2	11	17	15	25	68	TRANSLAMINAR	II/III to VI
GC1006_4	45-49	M/Parietal border	81	51	47	80	259	TRANSLAMINAR	II/III to VI
GC1006_5	49-56	SS	34	116	41	90	281	TRANSLAMINAR	II/III to VI
GC1006_6	53-59	Au	7	31	44	108	190	TRANSLAMINAR	II/III to VI
GC1006_7	52-58	Au	8	10	44	75	137	TRANSLAMINAR	II/III to VI
GC1006_8	56-65	Au	38	27	50	31	146	TRANSLAMINAR	II/III to VI
GC1013_1	18-25	SS	61	58	43	65	227	TRANSLAMINAR	II/III to VI
GC1013_2	35-41	M2	133	37	90	88	348	TRANSLAMINAR	II/III to VI
GC1011_1	45-51	SS	69	125	58	73	325	TRANSLAMINAR	II/III to VI
GC1011_2	51-54	Au	2	3	5	6	16	TRANSLAMINAR	II/III to VI

## Sheet: E10.5
LINEAGE ID	SECTIONS	AREA	II/III	IV	V	VI	TOT	LINEAGE TYPE	Layers
GC885_1	33-37	M	18	6	19	25	68	TRANSLAMINAR	II/III to VI
GC885_2	35-38	SS	10	4	3	7	24	TRANSLAMINAR	II/III to VI
GC885_3	35-41	SS	18	25	10	21	74	TRANSLAMINAR	II/III to VI
GC885_4	36-40	SS	29	38	59	35	161	TRANSLAMINAR	II/III to VI
GC885_5	39-42	SS	37	29	7	41	114	TRANSLAMINAR	II/III to VI
GC885_6	49-51	Vi	17	7	6	16	46	TRANSLAMINAR	II/III to VI
GC885_7	50-52	Au	1	8	6	3	18	TRANSLAMINAR	II/III to VI
GC885_8	53-54	Au	5	7	11	6	29	TRANSLAMINAR	II/III to VI
GC885_9	54-57	Au	6	16	1	8	31	TRANSLAMINAR	II/III to VI
GC885_10	57-59	Vi	32	28	13	23	96	TRANSLAMINAR	II/III to VI
GC999_1		M	12	9	23	18	62	TRANSLAMINAR	II/III to VI
GC1000_1	33-37	SS	16	14	7	18	55	TRANSLAMINAR	II/III to VI
GC1000_2	38-40	SS	2	13	6	11	32	TRANSLAMINAR	II/III to VI
GC1000_3	48-51	M	35	26	26	22	109	TRANSLAMINAR	II/III to VI
GC1000_4	56-58	Vi	7	9	8	7	31	TRANSLAMINAR	II/III to VI
GC1000_5	61-64	Vi	7	9	8	7	31	TRANSLAMINAR	II/III to VI
GC1000_6	35-38	SS	12	11	9	13	45	TRANSLAMINAR	II/III to VI
GC1000_7	39-43	SS	23	37	5	27	92	TRANSLAMINAR	II/III to VI
GC1000_8	43-46	SS/M Border	6	26	5	27	64	TRANSLAMINAR	II/III to VI
GC1000_9	44-46	SS/M Border	8	2	6	20	36	TRANSLAMINAR	II/III to VI
GC1000_10	45-47	M	17	7	5	4	33	TRANSLAMINAR	II/III to VI

## Sheet: E11.5
> 2 CELL LINEAGES
LINEAGE ID	SECTIONS	AREA	II/III	IV	V	VI	TOT	LINEAGE TYPE	Layers
GC859_1	21-26	M	3	1	2	3	9	TRANSLAMINAR	II/III to VI
GC859_2	27-28	Cg	5	2	6	5	18	TRANSLAMINAR	II/III to VI
GC859_3	27-28	SS	0	2	1	2	5	TRANSLAMINAR	IV-V-VI
GC859_4	28-32	SS	11	9	6	3	29	TRANSLAMINAR	II/III to VI
GC859_5	34-37	SS	13	4	2	6	25	TRANSLAMINAR	II/III to VI
GC859_6	37-39	M	3	5	4	6	18	TRANSLAMINAR	II/III to VI
GC859_7	37-40	SS	6	0	1	6	13	TRANSLAMINAR	II/III-V-VI
GC859_8	38-40	SS	6	3	0	6	15	TRANSLAMINAR	II/III-IV-VI
GC859_9	26-30	SS	2	3	6	2	13	TRANSLAMINAR	II/III to VI
GC859_10	43-45	M	8	3	2	12	25	TRANSLAMINAR	II/III to VI
GC859_11	48-51	Au	4	7	9	1	21	TRANSLAMINAR	II/III to VI
GC859_12	49-52	Vi	3	9	7	11	30	TRANSLAMINAR	II/III to VI
GC859_13	52-53	Vi	2	3	1	4	10	TRANSLAMINAR	II/III to VI
GC859_14	56-58	Vi	1	2	0	9	12	TRANSLAMINAR	II/III-IV-VI
GC982_1	17-19	SS	5	1	3	0	9	TRANSLAMINAR	II/III to V
GC982_2	13-19	SS	2	4	0	4	10	TRANSLAMINAR	II/III-IV-VI
GC982_3	18-22	SS	0	5	0	4	9	TRANSLAMINAR	IV-VI
GC982_4	24-27	SS	1	3	0	2	6	TRANSLAMINAR	II/III-IV-VI
GC982_5	25-26	SS	1	3	1	0	5	TRANSLAMINAR	II/III to V
GC982_6	30-33	SS	2	6	1	5	14	TRANSLAMINAR	II/III to VI
GC982_7	31-33	SS	0	3	0	2	5	TRANSLAMINAR	IV-VI
GC982_8	31	SS	0	0	0	4	4	DEEP	VI
GC982_9	31-36	SS	2	4	0	4	10	TRANSLAMINAR	II/III-IV-VI
GC982_10	44-46	SS	6	8	0	3	17	TRANSLAMINAR	II/III-IV-VI
GC982_11	42-43	MPTA	3	1	2	3	9	TRANSLAMINAR	II/III to VI
GC982_12	43-45	SS	7	6	3	2	18	TRANSLAMINAR	II/III to VI
GC982_13	52-54	Vi	2	3	3	7	15	TRANSLAMINAR	II/III to VI
GC982_14	60-62	Vi	1	1	1	6	9	TRANSLAMINAR	II/III to VI
GC983_1	24-26	SS	1	6	3	1	11	TRANSLAMINAR	II/III to VI
GC983_2	25-27	SS	2	3	3	4	12	TRANSLAMINAR	II/III to VI
GC983_3	33-34	SS	3	3	0	5	11	TRANSLAMINAR	II/III-IV-VI
GC983_4	35-37	SS	6	1	1	7	15	TRANSLAMINAR	II/III to VI
GC983_5	45-46	SS	1	2	0	5	8	TRANSLAMINAR	II/III-IV-VI
GC983_6	46	SS	3	1	2	3	9	TRANSLAMINAR	II/III to VI
GC983_7	50-52	Au	7	3	3	0	13	TRANSLAMINAR	II/III to V
GC983_8	54	Vi	1	2	2	4	9	TRANSLAMINAR	II/III to VI
GC983_9	62-64	Vi	3	5	6	0	14	TRANSLAMINAR	II/III to V
GC985_1	30-32	SS	6	8	2	2	18	TRANSLAMINAR	II/III to VI
GC985_2	31-33	SS2	2	1	0	2	5	TRANSLAMINAR	II/III-IV-VI
GC985_3	45-47	Au	0	0	3	3	6	DEEP	V-VI
GC985_4	47-49	SS	4	3	0	5	12	TRANSLAMINAR	II/III-IV-VI
GC985_5	S56-58	Vi	2	5	0	11	18	TRANSLAMINAR	II/III-IV-VI
GC926_1R	26-30	M	10	10	9	6	35	TRANSLAMINAR	II/III to VI
GC926_2R	43-45	Au	4	1	3	1	9	TRANSLAMINAR	II/III to VI
GC926_3R	47-49	SS	3	5	5	2	15	TRANSLAMINAR	II/III to VI
GC926_4R	52-54	SS	1	9	0	1	11	TRANSLAMINAR	II/III-IV-VI
GC926_5R	54-55	V2MM	2	2	3	2	9	TRANSLAMINAR	II/III to VI
GC926_6R	55-58	V2MM	2	1	0	6	9	TRANSLAMINAR	II/III-V-VI
GC926_7R	61-63	SS	3	3	3	2	11	TRANSLAMINAR	II/III to VI
GC926_1L	39-42	SS	2	2	0	7	11	TRANSLAMINAR	II/III-IV-VI
GC926_2L	51-54	SS2	7	2	3	2	14	TRANSLAMINAR	II/III to VI
2 CELL LINEAGES
LINEAGE ID	SECTIONS	AREA	II/III	IV	V	VI	TOT	LINEAGE TYPE	Layers
GC859_16	41	SS	0	0	0	2	2	DEEP	VI
1 CELL LINEAGES
LINEAGE ID	SECTIONS	AREA	II/III	IV	V	VI	TOT	LINEAGE TYPE	Layers
GC859_15	36	SS	0	0	0	1	1	DEEP	VI
GC982_15	24	SS	0	0	0	1	1	DEEP	VI
GC982_16	26	SS	0	0	0	1	1	DEEP	VI
GC982_17	25	SS	0	0	0	1	1	DEEP	VI
GC982_18	37	RSG	0	0	0	1	1	DEEP	VI
GC982_19	49	SS	0	0	0	1	1	DEEP	VI
GC982_20	49	Au	0	0	0	1	1	DEEP	VI
GC982_21	55	Vi	0	0	0	1	1	DEEP	VI
GC926_7R'	29	SS	0	0	0	1	1	DEEP	VI
GC926_8R	31	SS	0	0	0	1	1	DEEP	VI
GC926_9R	45	RSG	0	0	1	0	1	DEEP	V
GC926_10R	47	Vi	0	0	0	1	1	DEEP	VI

## Sheet: E12.5
> 2 CELLS LINEAGES
LINEAGE ID	SECTIONS	AREA	II/III	IV	V	VI	TOT	LINEAGE TYPE	Layers
GC906_1	21-22-23	SS	1	2	0	1	4	TRANSLAMINAR	II/III-IV-VI
GC906_2	23-24-25	SS	6	3	1	0	10	TRANSLAMINAR	II/III to V
GC906_3	23-24-25	M	2	1	1	0	4	TRANSLAMINAR	II/III to V
GC906_4	25-26-27	SS	0	5	0	0	5	SUPERFICIAL	IV
GC906_5	27-28	Cg	1	4	3	0	8	TRANSLAMINAR	II/III to V
GC906_6	29	SS	1	2	0	0	3	SUPERFICIAL	II/III-IV
GC906_7	31-32-33-34	SS/MOTOR Border	3	2	3	1	9	TRANSLAMINAR	II/III to VI
GC906_8	40-41-42	motor	3	2	0	3	8	TRANSLAMINAR	II/III-IV-VI
GC906_9	40-41-42-43	SS	4	3	2	2	11	TRANSLAMINAR	II/III to VI
GC906_10	43-44	M	2	1	0	2	5	TRANSLAMINAR	II/III-IV-VI
GC906_11	40-41	SS2	0	7	0	0	7	SUPERFICIAL	IV
GC906_12	46-47-49	SS/visual border Parietal	0	0	0	3	3	DEEP	VI
GC906_14	55-56	Vi	0	0	0	6	6	DEEP	VI
GC906_15	54-55-56	Vi	0	2	2	1	5	TRANSLAMINAR	IV to VI
GC906_16	S52-53	Vi	1	3	0	2	6	TRANSLAMINAR	II/III-IV-VI
GC906_17	53-54	Vi	0	4	0	1	5	TRANSLAMINAR	IV-VI
GC906_18	55-56	Auditory	2	2	0	2	6	TRANSLAMINAR	II/III-IV-VI
GC907_1	19-20-21	M	5	2	0	2	9	TRANSLAMINAR	II/III-IV-VI
GC907_2	20-21-22	SS	0	0	3	2	5	DEEP	V-VI
GC907_3	26-27-28	M	1	1	3	0	5	TRANSLAMINAR	II/III to V
GC907_4	27-28-29-30	SS	5	2	2	0	9	TRANSLAMINAR	II/III to V
GC907_5	49-50	Vi/CAUDAL SS	2	2	1	1	6	TRANSLAMINAR	II/III to VI
GC908_1	20-21-22	M	0	0	0	3	3	DEEP	VI
GC908_2	21-22-23-24	M	2	1	4	2	9	TRANSLAMINAR	II/III to VI
GC908_3	26-27-28	SS	3	2	0	0	5	SUPERFICIAL	II/III-IV
GC908_4	28-29	SS	0	2	1	1	4	TRANSLAMINAR	IV to VI
GC908_5	36-37-38	M	0	0	0	5	5	DEEP	VI
GC908_6	36-37	SS	0	5	0	0	5	SUPERFICIAL	IV
GC908_8	30-31	SS	1	2	0	2	5	TRANSLAMINAR	II/III-IV-VI
GC908_10	32-33-34	SS	1	4	0	0	5	SUPERFICIAL	II/III-IV
GC908_11	43-44-45-46	Vi	2	2	3	0	7	TRANSLAMINAR	II/III to V
GC967_1	32-34	M	4	1	0	2	7	TRANSLAMINAR	II/III-IV-VI
GC967_2	35	SS	0	3	0	0	3	SUPERFICIAL	IV
GC967_3	36-37-38	SS	2	3	0	0	5	SUPERFICIAL	II/III-IV
GC967_4	41-42	SS	0	4	0	1	5	TRANSLAMINAR	IV-VI
GC967_5	44-45-46	RSD/retrospinal	1	1	1	3	6	TRANSLAMINAR	II/III to VI
GC967_6	48-49	SS	0	0	4	0	4	DEEP	V
GC967_7	59-60-61	Vi	0	2	3	1	6	TRANSLAMINAR	IV to VI
GC967_8	69-70-71-72	Vi	0	0	0	5	5	DEEP	VI
GC967_9	30-31-33	SS	2	2	0	1	5	TRANSLAMINAR	II/III-IV-VI
GC967_10	30-31-32	SS	5	2	0	1	8	TRANSLAMINAR	II/III-IV-VI
GC967_11	29-30-31-32	SS	1	4	0	1	6	TRANSLAMINAR	II/III-IV-VI
GC967_12	30-31	SS	0	4	0	0	4	SUPERFICIAL	IV
GC967_13	33-34-35-36-37-38	SS	2	1	2	5	10	TRANSLAMINAR	II/III to VI
GC967_14	35-36-37	SS	0	6	0	0	6	SUPERFICIAL	IV
GC967_15	36-37	SS	1	3	0	0	4	SUPERFICIAL	II/III-IV
GC967_16	37-38	SS/MOTOR	2	2	0	0	4	SUPERFICIAL	II/III-IV
GC967_17	39-40	SS	0	0	3	2	5	DEEP	V-VI
GC967_18	41-42	M	7	2	3	2	14	TRANSLAMINAR	II/III to VI
GC967_19	42-43	SS	2	2	0	1	5	TRANSLAMINAR	II/III-IV-VI
GC967_20	46-47-48	SS	3	3	0	0	6	SUPERFICIAL	II/III-IV
GC967_21	48-49	Au	3	1	0	0	4	SUPERFICIAL	II/III-IV
GC967_22	49-50	Vi	1	2	0	2	5	TRANSLAMINAR	II/III-IV-VI
GC967_23	56-57	Vi	0	3	0	1	4	TRANSLAMINAR	IV-VI
GC967_24	56-57-58-59	Vi	0	3	1	1	5	TRANSLAMINAR	IV to VI
GC994-1R	26-28	SS	3	1	1	0	5	TRANSLAMINAR	II/III to V
GC994-2R	36-38	RSG	3	1	1	3	8	TRANSLAMINAR	II/III to VI
GC994-4R	37-38	SS	3	4	1	1	9	TRANSLAMINAR	II/III to VI
GC994-6R	41-42	SS	4	3	4	0	11	TRANSLAMINAR	II/III to V
GC994-3R	44-45	SS	2	2	0	3	7	TRANSLAMINAR	II/III-IV-VI
GC994-5R	47-51	SS	7	2	0	3	12	TRANSLAMINAR	II/III-IV-VI
GC994-7R	56-68	Vi	0	0	0	4	4	DEEP	VI
GC994-8R	58-60	Vi	0	0	0	4	4	DEEP	VI
GC998-2L	25-28	M	4	2	2	1	9	TRANSLAMINAR	II/III to VI
GC998-8R	52-54	Vi	1	1	1	2	5	TRANSLAMINAR	II/III to VI
GC998-3R	25-28	Cg	1	2	0	3	6	TRANSLAMINAR	II/III-IV-VI
GC998-5R	37-39	SS	2	2	0	1	5	TRANSLAMINAR	II/III-IV-VI
GC998-6L	40-41	SS	5	2	0	2	9	TRANSLAMINAR	II/III-IV-VI
GC998-7R	40-42	SS	3	3	0	0	6	SUPERFICIAL	II/III-IV
GC998-9L	52-54	Au	6	1	0	0	7	SUPERFICIAL	II/III-IV
GC997-1R	27-29	SS	4	1	2	1	8	TRANSLAMINAR	II/III to VI
GC997-2R	33-34	SS	0	4	1	0	5	TRANSLAMINAR	IV-V
GC997-5L	23-25	SS	0	0	0	5	5	DEEP	VI
2 CELL LINEAGES
			Neuron number /layer
LINEAGE ID	SECTION	AREA	II/III	IV	V	VI	TOT	LINEAGE TYPE	Layers
GC906_13	53-54	visual	0	0	0	2	2	DEEP	VI
GC_906-23R	29-30	M	0	0	0	2	2	DEEP	VI
GC_906-29L	56-57	Au	0	0	0	2	2	DEEP	VI
GC_906-31L	61	Au	0	0	1	1	2	DEEP	V-VI
GC_906-33L	24	SS	0	0	0	2	2	DEEP	VI
GC_906-35L	25-26	SS	0	0	1	1	2	DEEP	V-VI
GC_906-36R	29-31	SS	0	0	1	1	2	DEEP	V-VI
GC_906-37R	35	M	0	0	0	2	2	DEEP	VI
GC_906-38L	36	M	0	0	0	2	2	DEEP	VI
GC_906-41R	45	Au	1	1	0	0	2	SUPERFICIAL	II/III-IV
GC_906-61L	61	RSG	0	0	2	0	2	DEEP	V
GC_907-9L	24	SS	0	1	1	0	2	TRASLAMINAR	IV-V
GC_907-14R	31-32	SS	0	0	2	0	2	DEEP	V
GC908_Clone7	36	SS	0	0	0	2	2	DEEP	VI
GC_908-13R	24-26	SS	0	2	0	0	2	SUPERFICIAL	IV
GC_908-14R	29-30	SS	0	2	0	0	2	SUPERFICIAL	IV
GC_908-15R	40	SS	0	0	0	2	2	DEEP	VI
GC_908-16R	40-41	M	0	0	0	2	2	DEEP	VI
GC_908-17L	45	RSG	0	0	0	2	2	DEEP	VI
GC_908-19L	48	RSG	0	0	0	2	2	DEEP	VI
GC_967-26R	25	SS	0	0	2	0	2	DEEP	V
GC_967-29R	40	RSG	0	0	1	1	2	DEEP	V-VI
GC_967-36R	64	Au	0	0	1	1	2	DEEP	V-VI
GC_967-37L	64	Au	0	0	1	1	2	DEEP	V-VI
GC_967-39L	29-30	SS	0	1	1	0	2	TRANSLAMINAR	IV-V
GC_967-44R	62	Vi	0	2	0	0	2	SUPERFICIAL	IV
GC_994-9L	18	Cg	0	0	0	2	2	DEEP	VI
GC997-3L	37	SS	0	0	0	2	2	DEEP	VI
GC997-4L	69	V2MM	0	0	0	2	2	DEEP	VI
GC_997-7L	26-27	SS	0	0	0	2	2	DEEP	VI
SINGLE CELL LINEAGES
			LAMINAR DISTRIBUTION
LINEAGE ID	SECTION	AREA	II/III	IV	V	VI	TOT	LINEAGE TYPE	Layers
GC_994-10R	19	M	0	0	0	1	1	DEEP	VI
GC_994-11R	21	SS	0	0	1	0	1	DEEP	V
GC_994-12L	24	SS	0	0	0	1	1	DEEP	VI
GC_994-13L	25	SS	0	0	0	1	1	DEEP	VI
GC_994-14R	33	SS	0	1	0	0	1	SUPERFICIAL	IV
GC_994-15R	36	SS	0	1	0	0	1	SUPERFICIAL	IV
GC_994-16L	37	SS	0	0	0	1	1	DEEP	VI
GC_997-6R	25	Cg	0	1	0	0	1	SUPERFICIAL	IV
GC_997-8L	30	Cg2	0	0	0	1	1	DEEP	VI
GC_997-9R	31	SS	0	0	1	0	1	DEEP	V
GC_997-10L	33	SS				1	1	DEEP	VI
GC_997-11R	33	M				1	1	DEEP	VI
GC_997-12L	37	SS		1			1	SUPERFICIAL	IV
GC_997-13L	47	SS				1	1	DEEP	VI
GC_997-14R	64	Vi			1		1	DEEP	V
GC_998-10R	27	SS			1		1	DEEP	V
GC_998-11L	36	SS				1	1	DEEP	VI
GC_998-12L	47	SS				1	1	DEEP	VI
GC_906-19L	21	M		1			1	SUPERFICIAL	IV
GC_906-20R	22	SS		1			1	SUPERFICIAL	IV
GC_906-20R	22	SS		1			1	SUPERFICIAL	IV
GC_906-21L	23	Cg		1			1	SUPERFICIAL	IV
GC_906-22R	25	SS				1	1	DEEP	VI
GC_906-24R	35	Cg				1	1	DEEP	VI
GC_906-25L	47	Vi				1	1	DEEP	VI
GC_906-26R	51	RSG				1	1	DEEP	VI
GC_906-27R	53	Vi		1			1	SUPERFICIAL	IV
GC_906-28L	56	Vi				1	1	DEEP	VI
GC_906-30L	60	Vi				1	1	DEEP	VI
GC_906-32L	21	Cg		1			1	SUPERFICIAL	IV
GC_906-34R	25	M				1	1	DEEP	VI
GC_906-39R	41	SS				1	1	DEEP	VI
GC_906-40R	43	RSD				1	1	DEEP	VI
GC_906-42R	45	RSG				1	1	DEEP	VI
GC_906-43R	48	Vi				1	1	DEEP	VI
GC_906-44R	56	Vi				1	1	DEEP	VI
GC_907-7L	23	M		1			1	SUPERFICIAL	IV
GC_907-8L	24	M			1		1	DEEP	V
GC_907-10R	24	SS	1				1	SUPERFICIAL	II/III
GC_907-11R	26	M				1	1	DEEP	VI
GC_907-12L	30	Cg				1	1	DEEP	VI
CG_907-13R	31	SS				1	1	DEEP	VI
GC_907-15R	48	Vi	1				1	SUPERFICIAL	II/III
GC_907-16R	49	Vi			1		1	DEEP	V
GC_907-17L	53	RSG				1	1	DEEP	VI
GC_907-18R	54	Au	1				1	SUPERFICIAL	II/III
GC_907-19L	56	Au				1	1	DEEP	VI
GC_908-12R	20	SS				1	1	DEEP	VI
GC_908-18L	48	Vi				1	1	DEEP	VI
GC_967-25L	23	SS			1		1	DEEP	V
GC_967-27R	31	SS				1	1	DEEP	VI
GC_967-28R	33	SS		1			1	SUPERFICIAL	IV
GC_967-30L	41	SS				1	1	DEEP	VI
GC_967-31L	43	SS				1	1	DEEP	VI
GC_967-32R	52	SS			1		1	DEEP	V
GC_967-33R	60	Vi				1	1	DEEP	VI
GC_967-34L	61	Au				1	1	DEEP	VI
GC_967-35R	64	Vi			1		1	DEEP	V
GC_967-38R	24	M			1		1	DEEP	V
GC_967-40L	30	SS				1	1	DEEP	VI
GC_967-41R	40	SS				1	1	DEEP	VI
GC_967-42R	40	SS				1	1	DEEP	VI
GC_967-43R	46	SS			1		1	DEEP	V

## Sheet: E14.5
LINEAGE ID	SECTIONS	AREA	II/III	IV	V	VI	TOT	LINEAGE TYPE	Layers
GC860_1	44-45	SS	2	1	0	0	3	SUPERFICIAL	II/III-IV
GC860_2	43-45	SS	2	2	0	0	4	SUPERFICIAL	II/III-IV
GC860_3	26	M	3	0	0	0	3	SUPERFICIAL	II/III
GC860_4	33	SS	2	0	0	0	2	SUPERFICIAL	II/III
GC860_5	34	SS	2	0	0	0	2	SUPERFICIAL	II/III
GC860_6	22-23	M	2	1	0	0	3	SUPERFICIAL	II/III-IV
GC860_7	22-23	SS	2	0	0	0	2	SUPERFICIAL	II/III
GC975_1	27-29	M	5	0	0	0	5	SUPERFICIAL	II/III
GC975_2	30-31	SS	2	0	0	0	2	SUPERFICIAL	II/III
GC975_3	33-34	SS	1	1	0	0	2	SUPERFICIAL	II/III-IV
GC975_4	46-47	SS	2	0	0	0	2	SUPERFICIAL	II/III
GC977_1	31-32	SS	2	0	0	0	2	SUPERFICIAL	II/III
GC977_2	39-40	SS	0	2	0	0	2	SUPERFICIAL	IV
GC980_1	12	Prf	2	0	0	0	2	SUPERFICIAL	II/III
GC980_2	22-23	M	3	0	0	0	3	SUPERFICIAL	II/III
GC980_3	23	SS	2	0	0	0	2	SUPERFICIAL	II/III
GC980_4	25-27	SS	2	2	0	0	4	SUPERFICIAL	II/III-IV
GC980_5	28-30	M	1	2	0	0	3	SUPERFICIAL	II/III-IV
GC980_6	29	SS	0	2	0	0	2	SUPERFICIAL	IV
GC980_7	32-34	SS	2	0	0	0	2	SUPERFICIAL	II/II
GC980_8	34-37	SS	1	2	0	0	3	SUPERFICIAL	II/III-IV
GC980_9	36-38	SS	4	1	0	0	5	SUPERFICIAL	II/III-IV
GC980_10	39	SS	0	2	0	0	2	SUPERFICIAL	IV
GC980_11	40-41	SS	3	0	0	0	3	SUPERFICIAL	II/III
GC980_12	41-42	SS	0	2	0	0	2	SUPERFICIAL	IV
GC980_13	43-48		2	2	0	0	4	SUPERFICIAL	II/III-IV
GC980_14	50-52		0	2	0	0	2	SUPERFICIAL	IV
GC980_15	51-52	SS	2	1	0	0	3	SUPERFICIAL	II/III-IV
GC980_16	51-53		5	0	0	0	5	SUPERFICIAL	II/III
GC980_17	54		3	1	0	0	4	SUPERFICIAL	II/III-IV
GC980_18	54-55		3	0	0	0	3	SUPERFICIAL	II/III
GC980_19	56-57		3	0	0	0	3	SUPERFICIAL	II/III
