# Supplementary material for: A stochastic framework of neurogenesis underlies the assembly of neocortical cytoarchitecture
Source: eLife. 2019 Nov 18;8:e51381. doi: 10.7554/eLife.51381 (PMC6968929; doi:10.7554/eLife.51381)
Supplement: Figure 1—source data 2. [file elife-51381-fig1-data2.xlsx]

## Sheet: Sheet1
Table 1. Summary of data and statistical analyses for Figures 1-7 and Figure supplements
Figure 1	Measurement	Values	N	Statistical	P value
Figure 1d	Number of neurons per lineage (Top:mean ± SEM Bottom: median ± IC distance)	E9.5: 199.23 ± 28.83; E10.5: 59.62 ± 8.02; E11.5: 13.04 ± 0.94; E12.5: 6.14 ± 0.27; E14.5: 2.84 ± 0.17 E9.5: 219 ± 178; E10.5: 46 ± 51.5; E11.5: 11 ± 26; E12.5: 5 ± 11; E14.5: 3 ± 2	[Clones] E9.5, n = 13; E10.5, n = 21; E11.5, n = 51; E12.5, n = 73; E14.5, n = 32; [Brains] E9.5, n = 4; E10.5, n = 3; E11.5, n = 5; E12.5, n = 7; E14.5, n = 3
Figure 1e	Fraction of one cell, two cells, and three or more cell lineages (percentage over total)	One cell: E9.5: 0%; E10.5: 0%; E11.5: 18.75%; E12.5: 39.15%	[Clones] E9.5, n = 13; E10.5, n = 21; E11.5, n = 64; E12.5, n = 166; [Brains] E9.5, n = 4; E10.5, n = 3; E11.5, n = 5; E12.5, n = 7;
		Two cells: E9.5: 0%; E10.5: 0%; E11.5: 1.56%; E12.5: 16.46%	[Clones] E9.5, n = 13; E10.5, n = 21; E11.5, n = 64; E12.5, n = 166; [Brains] E9.5, n = 4; E10.5, n = 3; E11.5, n = 5; E12.5, n = 7
		Three or more cells: E9.5: 100%; E10.5: 100%; E11.5: 79.69%; E12.5: 44.39%;	[Clones] E9.5, n = 13; E10.5, n = 21; E11.5, n = 64; E12.5, n = 166; [Brains] E9.5, n = 4; E10.5, n = 3; E11.5, n = 5; E12.5, n = 7
Figure 1 - figure supplement 1	Measurement	Values	N	Statistical	P value
Figure 1-figure supplement 1b	Fraction of lineages with one or two reporters (percentage over total)	One: 95.83%; Two: 4.17%	[Clones]: n = 296 [Brains]: n = 19
Figure 2	Measurement	Values	N	Statistical	P value
Figure 2e	Fraction of translaminar, deep, and superficial lineages (precentage over total)	Translaminar: 63.01%; Deep: 15.07%; Superficial: 21.92%	[Clones]: n = 73 [Brains]: n = 7
	Number of neurons per lineage (Top:mean ± SEM Bottom: median ± IC distance)	Translaminar: 6.96 ± 2.38; Deep: 4.45 ± 0.93; Superficial: 4.94 ± 1.24% Translaminar: 6 ± 4; Deep: 5 ± 1; Superficial: 5 ± 2%	[Clones]: n = 73 [Brains]: n = 7
Figure 2i	Fraction of translaminar, deep, and superficial lineages (precentage over total)	Translaminar: 6.67%; Deep: 80%; Superficial: 13.33%	[Clones]: n = 30 [Brains]: n = 7
Figure 2m	Fraction of lineages per cortical layer (precentage over total)	Layer II/III: 4.76%; Layer IV: 19.05%; Layer V: 17.46%; Layer VI: 58.73%	[Clones]: n = 63 [Brains]: n = 7
Figure 2 - figure supplement 1	Measurement	Values	N	Statistical	P value
Figure 2-figure supplement 2d	Fraction of translaminar, deep, and superficial lineages (precentage over total)	Translaminar: 2.78%; Deep: 56.94%; Superficial: 40.28%	[Clones]: n = 72 [Brains]: n = 12
Figure 3	Measurement	Values	N	Statistical	P value
Figure 3d	Fraction of translaminar, deep, and superficial lineages (precentage over total)	Translaminar: 91.05%; Deep: 6.6%; Superficial: 1.89%	[Clones]: n = 106 [Brains]: n = 28
	Number of neurons per lineage (Top:mean ± SEM Bottom: median ± IC distance)	Translaminar: 8.05 ± 2.83; Deep: 4.00 ± 1.00 Translaminar: 8 ± 3; Deep: 4 ± 1	[Clones]: n = 106 [Brains]: n = 28
Figure 3 - figure supplement 1	Measurement	Values	N	Statistical	P value
Figure 3-figure supplement 3c	Fraction of translaminar, deep, and superficial hemilineages (precentage over total)	Translaminar: 80.71%; Deep: 7.11%; Superficial: 12.18%	[Clones]: n = 106 [Brains]: n = 28
Figure 4	Measurement	Values	N	Statistical	P value
Figure 4e	Fraction of translaminar, deep, and superficial lineages (precentage over total)	Translaminar: 75.38%; Deep: 13.46%; Superficial: 11.15%	[Clones]: n = 260 [Brains]: n = 25
	Number of neurons per lineage (Top:mean ± SEM Bottom: median ± IC distance)	Translaminar: 7.22 ± 2.37; Deep: 3.77 ± 1.29; Superficial: 4.90 ± 1.82 Translaminar: 7 ± 4; Deep: 3 ± 1; Superficial: 4 ± 2.5	[Clones]: n = 260 [Brains]: n = 25
Figure 5	Measurement	Values	N	Statistical	P value
Figure 5e	Fraction of lineages containing 3 to 12 cells (percentage over total)	Translaminar: [3]: 3.46%; [4]: 8.08%; [5]: 8.85%; [6]: 9.23%; [7]: 11.54%; [8]: 11.54%; [9]: 8.85%; [10]: 6.15%; [11]: 4.62%; [12]: 3.08%; Deep: [3]: 8.08%; [4]: 3.08%; [5]:1.15%; [7]: 0.77%; [8]: 0.38%; Superficial: [3]: 2.69; [4]: 3.85%; [5]: 0.77%; [6]: 1.54%; [7]: 0.77%; [8]: 1.15%; [9]: 0.38%	[Clones]: n = 260 [Brains]: n = 25
Figure 5f	Fraction of lineages in each configuration (percentage over total)	[II/III]: 1.92%; [IV]: 1.54%; [II/III-IV]: 7.69%; [V]: 1.54%; [VI]: 5.77%; [V-VI]: 6.15%; [II/III to VI]: 22.69%; [II/III-IV-VI]: 14.62%; [II/III-V-VI]: 10.38%; [II/III to V]: 7.31%; [II/III-V]: 5.38%; [IV-VI]: 4.62%; [IV to VI]: 3.85%; [II/III-VI]: 3.46%; [IV-V]: 3.08%	[Clones]: n = 260 [Brains]: n = 25
Figure 5g	Number of lineages in each combination(total number)	[y-x] // [2-2]: 2; [2-3]: 1; [2-4]: 1; [3-3]: 3; [3-5]: 1; [3-6]: 1; [3-8]: 2; [4-2]: 3; [4-3]: 3; [4-4]: 3; [4-5]: 3; [4-6]: 1; [5-2]: 4; [5-3]: 3; [5-4]: 2; [5-5]: 3; [6-2]: 3; [6-3]: 2; [6-4]: 3; [6-5]: 4; [7-3]: 3; [7-4]: 2; [8-3]: 1; [8-4]: 1; [9-3]: 1; [10-2]: 1	[Clones]: n = 57 [Brains]: n = 25
Figure 5h	Fraction of lineages containing each sutype combination (precentage over total all-layer lineages)	[CCPN]: 23.08%; [CCPN; L5SCPN]: 7.69%; [CCPN; L6CThPN]: 11.54%; [CCPN; L5HPN]: 11.54%; [CCPN; L5HPN; L6CThPN]: 15.38%; [CCPN; L5SCPN; L5HPN]: 7.69%; [CCPN; L5SCPN; L6CThPN]: 15.38%; [CCPN; L5SCPN; L5HPN; L6CThPN]: 7.69%	[Clones]: n = 26 [Brains]: n = 25
Figure 5 - figure supplement 1	Measurement	Values	N	Statistical	P value
Figure 5-figure supplement 1d	Fraction of lineages containing 3 to 12 cells (percentage over total)	Translaminar, [4]: 5.48%; [5]: 19.18%; [6]: 9.59%; [7]: 4.11%; [8]: 6.85%; [9]: 9.59%; [10]: 2.74%; [11]: 2.74%; [12]: 1.37%; [14]: 1.37%; Deep, [3]: 2.74%; [4]: 4.12%; [5]: 6.85%; [6]: 1.37%; Superficial, [3]: 2.74; [4]: 5.48%; [5]: 6.85%; [6]:4.11%; [7]: 2.74	[Clones]: n = 73 [Brains]: n = 7
Figure 5-figure supplement 1e	Fraction of lineages in each configuration (percentage over total)	[IV]: 8.22%; [II/III-IV]: 13.7%; [V]: 1.37%; [VI]: 10.96%; [V-VI]: 2.74%; [II/III to VI]: 16.44%; [II/III-IV-VI]: 24.66%; [II/III to V]: 10.96%; [IV-VI]: 4.11%; [IV to VI]: 5.48%; [IV-V]: 1.37%	[Clones]: n = 73 [Brains]: n = 7
Figure 5-figure supplement 1i	Fraction of lineages containing 3 to 12 cells (percentage over total)	Translaminar, [3]: 0.94%; [4]: 4.72%; [5]: 9.43%; [6]:12.26%; [7]: 14.15%; [8]: 17.92%; [9]: 12.26%; [10]: 3.77%; [11]: 5.66%; [12]: 5.66%; [13]: 0.94%; [14]: 0.94%; [15]: 1.89%; [21]: 0.94%; Deep, [3]: 1.89%; [4]: 3.77%; [6]: 0.94%; Superficial, [6]: 1.89%	[Clones]: n = 106 [Brains]: n = 28
Figure 5-figure supplement 1j	Fraction of lineages in each configuration (percentage over total)	[II/III-IV]: 1.89%; [VI]: 6.6%; [II/III to VI]: 44.34%; [II/III-IV-VI]: 21.70%; [II/III-V-VI]: 1.89%; [II/III to V]: 9.43%; [IV-VI]: 3.77%; [IV to VI]: 9.43%; [IV-V]: 0.94%	[Clones]: n = 106 [Brains]: n = 28
Figure 5 - figure supplement 2	Measurement	Values	N	Statistical	P value
Figure 5-figure supplement 2c	Fraction of cells expressing Tle4 (mean % ± Std)	C+/S-: [Tle4+]: 77.43 ± 12.46%; [Tle4-]: 22.57 ± 12.46; C-/S+: [Tle4+]: 10.19 ± 7.20%; [Tle4-]: 89.81 ± 7.20%; C-/S-: [Tle4+]: 22.39 ± 3.38%; [Tle4-]: 77.61 ± 3.38%; C+/S+: [Tle4+]: 58.21 ± 1.33%; [Tle4-]: 41.79 ± 1.33	[Cells]: n = 1123 [Brains]: n = 2
Figure 5 - figure supplement 3		Values	N	Statistical	P value
Figure 5-figure supplement 3b	Number of neurons per lineage (mean ± Std)	[P21] : 6.51± 2.56; [P2]: 6.97 ± 2.76	P21, [Clones]: n = 260; [Brains]: n = 25; P2, [Clones]: n = 110; [Brains]: n = 10	Mann-Whitney test	p = 0.1501
Figure 5-figure supplement 3c	Fraction of lineages containing 3 to 12 cells (percentage over total)	P21: [3]: 14.23%; [4]: 15.00%; [5]: 10.77%; [6]: 10.77%; [7]: 13.08%; [8]: 13.08%; [9]: 9.23%; [10]: 6.15%; [11]: 4.62%; [12]: 3.08%; P2: [3]: 17.27%; [4]: 5.45%; [5]: 8.18%; [6]: 13.63%; [7]: 14.55%; [8]: 8.18%; [9]: 12.72%; [10]: 7.27%; [11]: 6.36%; [12]: 6.36%	P21, [Clones]: n = 260; [Brains]: n = 25; P2, [Clones]: n = 110; [Brains]: n = 10	Chi-square test	p = 0.1653
Figure 5-figure supplement 3d	Fraction of translaminar, deep, and superficial lineages (precentage over total)	P21, Translaminar: 75.38%; Deep: 13.46%; Superficial: 11.15%; P2, Translaminar: 83.63%; Deep: 7.27%; Superficial: 9.09%	P21, [Clones]: n = 260; [Brains]: n = 25; P2, [Clones]: n = 110; [Brains]: n = 10	Fisher's exact test	p = 0.1127
Figure 5-figure supplement 3e	Fraction of lineages in each configuration (percentage over total)	P21: [II/III_&_IV to VI]: 36.78%; [II/III_&_IV-VI]: 22.99%; [II/III_&_IV to V]: 15.71%; P2: [II/III_&_IV to VI]: 47.27%; [II/III_&_IV-VI]: 15.45%; [II/III_&_IV to V]: 20.91%	P21, [Clones]: n = 260; [Brains]: n = 25; P2, [Clones]: n = 110; [Brains]: n = 10	Chi-square test	p = 0.0994
Figure 6	Measurement	Values	N	Statistical	P value
Figure 6a	Likelihood for each number of categories (percentage over total samples)	[1]: 74.95%; [2]: 23.63%; [3]: 0.014%;	[Samples]: n = 4000
Figure 6b	Fraction of cells per layer (percentage over total & mean percentage ± Std)	Experimental data, [II/III]: 29.86%; [IV]: 30.69%; [V]: 14.86%; [VI]: 24.58%; Bayesian Model, [II/III]: 29.77 ± 2.25%; [IV]: 30.76 ± 2.29%; [V]: 14.79 ± 1.80%; [VI]: 24.68 ± 2.15%	Experimental, [Clones]: n = 103; [Brains]: n = 25; Bayesian model, [Samples]: n = 4000
Figure 6c	Fraction of lineages containing 3 to 12 cells (percentage over total & mean percentage ± Std)	Experimental data, [3]: 10.68%; [4]: 14.56%; [5]: 6.80%; [6]: 10.68%; [7]: 11.65%; [8]: 17.48%; [9]: 11.65%; [10]: 3.88%; [11]: 5.83%; [12]: 6.80%; Bayesial Model, [3]: 6.27 ± 2.34%; [4]: 7.91 ± 2.74%; [5]: 9.92 ± 3.03%; [6]: 11.44 ± 3.23%; [7]: 12.17± 3.28%; [8]: 11.83 ± 3.22%; [9]: 10.39% ± 3.02%; [10]: 8.23 ± 2.80%; [11]: 5.99 ± 2.41%; [12]: 3.96 ± 2.02%	Experimental, [Clones]: n = 103; [Brains]: n = 25; Bayesian model, [Samples]: n = 4000
Figure 6e	Fraction of translaminar, deep, and superficial lineages (precentage over total)	Experimental data (mean {I.C. 95%}), Translaminar: 77.67 {68.93-84.47}%; Deep: 10.68 {5.83-17.48}%; Superficial: 11.65 {6.8-19.42}%; Bayesian model (median ± intercuartile distance), Translaminar: 82.52 ± 3.88%; Deep: 10.68 ± 3.88%; Superficial: 4.85 ± 2.91	Experimental, [Clones]: n = 103; [Brains]: n = 25; Bayesian model, [Samples]: n = 4000	Chi-square test	p=0.036
Figure 6f	Fraction of lineages in each configuration (percentage over total)	Experimental data (mean {I.C. 95%}), [II/III to VI]: 22.33 {14.56-31.07}%; [II/III-IV-VI]: 20.39 {13.59-29.61}%; [II/III-V-VI]: 4.85 {1.94-10.68}%; [II/III to V]: 6.80 {2.91-13.59}%; [II/III-V]: 1.94 {0-6.09}%; [IV-VI]: 7.77 {3.88-14.56}%; [IV to VI]: 7.77 {3.88-14.56}%; [II/III-VI]: 0.97 {0-5.82}%; [IV-V]: 4.85 {1.94-19.71}%; Bayesian model (median ± intercuartile distance), [II/III to VI]: 33.0…	Experimental, [Clones]: n = 103; [Brains]: n = 25; Bayesian model, [Samples]: n = 4000	Chi-square test	p=0.11
Figure 6 - figure supplement 1	Measurement	Values	N	Statistical	P value
Figure 6-figure supplement 1a	Fraction of cells per layer (percentage over total & mean percentage ± Std)	Experimental data, [II/III]: 29.86%; [IV]: 30.69%; [V]: 14.86%; [VI]: 24.58%; Permuted, [II/III]: 29.86 ± 0%; [IV]: 30.69 ± 0%; [V]: 14.86 ± 0%; [VI]: 24.58 ± 0%	Experimental, [Clones]: n = 103; [Brains]: n = 25; Permuted, [Clones]: n = 103
Figure 6-figure supplement 1b	Fraction of lineages containing 3 to 12 cells (percentage over total & mean percentage ± Std)	Experimental data, [3]: 10.68%; [4]: 14.56%; [5]: 6.80%; [6]: 10.68%; [7]: 11.65%; [8]: 17.48%; [9]: 11.65%; [10]: 3.88%; [11]: 5.83%; [12]: 6.80%; Permuted, [3]: 10.68 ± 0%; [4]: 14.56 ± 0%; [5]: 6.80 ± 0%; [6]: 10.68 ± 0%; [7]: 11.65 ± 0%; [8]: 17.48 ± 0%; [9]: 11.65 ± 0%; [10]: 3.88 ± 0%; [11]: 5.83 ± 0%; [12]: 6.80 ± 0%	Experimental, [Clones]: n = 103; [Brains]: n = 25; Permuted, [Clones]: n = 103
Figure 7	Measurement	Values	N	Statistical	P value
Figure 7b	Fraction of cells per layer (percentage over total & mean percentage ± Std)	Experimental data, [II/III]: 29.86%; [IV]: 30.69%; [V]: 14.86%; [VI]: 24.58%; Model 2, [II/III]: 29.97 ± 2.43%; [IV]: 30.82 ± 1.93%; [V]: 13.95 ± 1.28%; [VI]: 25.26 ± 2.18%	Experimental, [Clones]: n = 103; [Brains]: n = 25; Model 2, [Clones]: n = 103
Figure 7c	Fraction of lineages containing 3 to 12 cells (percentage over total & mean percentage ± Std)	Experimental data, [3]: 10.68%; [4]: 14.56%; [5]: 6.80%; [6]: 10.68%; [7]: 11.65%; [8]: 17.48%; [9]: 11.65%; [10]: 3.88%; [11]: 5.83%; [12]: 6.80%; Model 2, [3]: 13.33 ± 3.24%; [4]: 13.72 ± 3.85%; [5]: 9.50 ± 2.81%; [6]: 9.81 ± 3.06%; [7]: 11.11 ± 3.05%; [8]: 11.10 ± 3.43%; [9]: 9.34% ± 3.07%; [10]: 8.90 ± 2.89%; [11]: 7.12 ± 2.41%; [12]: 6.07 ± 2.22%	Experimental, [Clones]: n = 103; [Brains]: n = 25; Model 2, [Clones]: n = 103
Figure 7e	Fraction of Translaminar, Deep, and Superficial lineages (precentage over total)	Experimental data (mean {I.C. 95%}): Translaminar: 77.67 {68.93-84.47}%; Deep: 10.68 {5.83-17.48}%; Superficial: 11.65 {6.8-19.42}%; Model 2 (median ± intercuartile distance), Translaminar: 78 ± 5.5%; Deep: 11 ± 4.5%; Superficial: 11 ± 5.0%	Experimental, [Clones]: n = 103; [Brains]: n = 25; Model 2, [Clones]: n = 103	Fisher's exact test	p = 0.99
Figure 7f	Fraction of lineages in each configuration (percentage over total)	Experimental data (mean {I.C. 95%}), [II/III to VI]: 22.33 {14.56-31.07}%; [II/III-IV-VI]: 20.39 {13.59-29.61}%; [II/III-V-VI]: 4.85 {1.94-10.68}%; [II/III to V]: 6.80 {2.91-13.59}%; [II/III-V]: 1.94 {0-6.09}%; [IV-VI]: 7.77 {3.88-14.56}%; [IV to VI]: 7.77 {3.88-14.56}%; [II/III-VI]: 0.97 {0-5.82}%; [IV-V]: 4.85 {1.94-19.71}%; Model 2 (median ± intercuartile distance), [II/III to VI]: 30 ± 6.0%; …	Experimental, [Clones]: n = 103; [Brains]: n = 25; Model 2, [Clones]: n = 103	Chi-square test	p = 0.24
Figure 7h	Fraction of cells per layer (percentage over total ± Std)	Fucci quantification, S1: [II/III]: 25.68 ± 2.13%; [IV]: 24.63 ± 0.63%; [V]: 16.61 ± 0.67%; [VI]: 33.09 ± 2.38%; Vi1: [II/III]: 30.39 ± 1.10%; [IV]: 24.31 ± 1.32%; [V]: 21.86 ± 1.22%; [VI]: 23.44 ± 1.58%; Model 2, S1: [II/III]: 24.43 ± 2.12%; [IV]: 24.46 ± 2.04%; [V]: 14.31 ± 1.27%; [VI]: 36.12 ± 2.24%; Vi1; [II/III]: 30.17 ± 2.03%; [IV]: 24.30 ± 1.74%; [V]: 22.13 ± 1.75%; [VI]: 23.40 ± 1.71%	[Brains]: n = 3
Figure 7 - figure supplement 1	Measurement	Values	N	Statistical	P value
Figure 7-figure supplement 1b	Fraction of cells per layer (percentage over total & mean percentage ± Std)	Experimental data, [II/III]: 29.86%; [IV]: 30.69%; [V]: 14.86%; [VI]: 24.58%; Model 1, [II/III]: 29.21 ± 2.31%; [IV]: 30.36 ± 1.88%; [V]: 15.30 ± 1.29%; [VI]: 25.13 ± 2.04%	Experimental, [Clones]: n = 103; [Brains]: n = 25; Model 1, [Clones]: n = 103
Figure 7-figure supplement 1c	Fraction of lineages containing 3 to 12 cells (percentage over total & mean percentage ± Std)	Experimental data, [3]: 10.68%; [4]: 14.56%; [5]: 6.80%; [6]: 10.68%; [7]: 11.65%; [8]: 17.48%; [9]: 11.65%; [10]: 3.88%; [11]: 5.83%; [12]: 6.80%; Model 1, [3]: 10.09 ± 3.03%; [4]: 9.97 ± 2.87%; [5]: 10.23 ± 3.07%; [6]: 11.08 ± 3.16%; [7]: 11.35 ± 3.35%; [8]: 12.18 ± 3.08%; [9]: 10.84 ± 3.33%; [10]: 9.86 ± 2.66%; [11]: 8.10 ± 2.70%; [12]: 6.30 ± 2.30%	Experimental, [Clones]: n = 103; [Brains]: n = 25; Model 1, [Clones]: n = 103
Figure 7-figure supplement 1e	Fraction of Translaminar, Deep, and Superficial lineages (precentage over total)	Experimental data (mean {I.C. 95%}): Translaminar: 77.67 {68.93-84.47}%; Deep: 10.68 {5.83-17.48}%; Superficial: 11.65 {6.8-19.42}%; Model 1 (median ± intercuartile distance), Translaminar: 85 ± 5.0%; Deep: 11 ± 5.0%; Superficial: 4 ± 2.5%	Experimental, [Clones]: n = 103; [Brains]: n = 25; Model 1, [Clones]: n = 103	Fisher's exact test	p = 0.13
Figure 7-figure supplement 1f	Fraction of lineages in each configuration (percentage over total)	Experimental data (mean {I.C. 95%}), [II/III to VI]: 22.33 {14.56-31.07}%; [II/III-IV-VI]: 20.39 {13.59-29.61}%; [II/III-V-VI]: 4.85 {1.94-10.68}%; [II/III to V]: 6.80 {2.91-13.59}%; [II/III-V]: 1.94 {0-6.09}%; [IV-VI]: 7.77 {3.88-14.56}%; [IV to VI]: 7.77 {3.88-14.56}%; [II/III-VI]: 0.97 {0-5.82}%; [IV-V]: 4.85 {1.94-19.71}%; Model 1 (median ± intercuartile distance), [II/III to VI]: 34 ± 6.0%; …	Experimental, [Clones]: n = 103; [Brains]: n = 25; Model 1, [Clones]: n = 103	Chi-square test	p = 0.16
