# Supplementary material for: A stochastic framework of neurogenesis underlies the assembly of neocortical cytoarchitecture
Source: eLife. 2019 Nov 18;8:e51381. doi: 10.7554/eLife.51381 (PMC6968929; doi:10.7554/eLife.51381)
Supplement: Figure 2—figure supplement 1—source data 1. [file elife-51381-fig2-figsupp1-data1.xlsx]

## Sheet: Tbr2 lineages
LINEAGE ID	SECTIONS	AREA	II/III	IV	V	VI	TOT	LINEAGE TYPE	Layers
AL 327_1	M	17	0	0	0	1	1	DEEP	VI
AL 327_2	SS	21	0	1	0	0	1	SUPERFICIAL	IV
AL 327_3	SS	37-40	0	1	1	0	2	TRANSLAMINAR	IV-V
AL 327_4	SS	40	0	0	0	1	1	DEEP	VI
AL 327_5	RSD	50	1	0	0	0	1	SUPERFICIAL	II/III
AL 327_6	RSD	56	0	0	0	1	1	DEEP	VI
AL 327_7	Vi	60	0	0	0	1	1	DEEP	VI
AL 328_1	SS	30-35	1	1	0	0	2	SUPERFICIAL	II/III-IV
AL 328_2	SS	44	1	0	0	0	1	SUPERFICIAL	II/III
AL 328_3	SS	45	0	0	0	1	1	DEEP	VI
AL 328_4	Au	48	1	0	0	0	1	SUPERFICIAL	II/III
AL 328_5	Vi	51	0	1	0	0	1	SUPERFICIAL	IV
AL 328_6	Vi	55	0	0	1	1	2	DEEP	V-VI
AL 328_7	Vi	62	2	0	0	0	2	SUPERFICIAL	II/III
AL 328_8	Vi	65	0	0	1	0	1	DEEP	V
AL 331_1	M	24	0	1	0	0	1	SUPERFICIAL	IV
AL 331_2	Cg	34-35	2	0	0	0	2	SUPERFICIAL	II/III
AL 331_3	SS	34	1	0	0	0	1	SUPERFICIAL	II/III
AL 331_4	SS	37-38	0	0	0	2	2	DEEP	VI
AL 331_5	SS	43	0	0	0	1	1	DEEP	VI
AL 331_6	RSD	44	0	0	1	0	1	DEEP	V
AL 331_7	RSD	45	1	0	0	0	1	SUPERFICIAL	II/III
AL 331_8	SS	46	0	0	0	1	1	DEEP	VI
AL 331_9	Vi	58	0	0	0	1	1	DEEP	VI
AL 331_10	Au	64	0	0	0	1	1	DEEP	VI
AL 332_1	Cg	21	0	0	0	1	1	DEEP	VI
AL 332_2	SS	32	0	0	0	1	1	DEEP	VI
AL 333_1	SS	29-33	0	1	1	0	2	TRANSLAMINAR	IV-V
AL 333_2	M	32	0	0	1	0	1	DEEP	V
AL 333_3	SS	33	0	0	0	1	1	DEEP	VI
AL 333_4	M	37	1	0	0	0	1	SUPERFICIAL	II/III
AL 333_5	SS	40	1	0	0	0	1	SUPERFICIAL	II/III
AL 333_6	SS	41	0	0	0	1	1	DEEP	VI
AL 333_7	Vi	50	0	0	0	1	1	DEEP	VI
AL 333_8	Au	50-53	0	0	0	2	2	DEEP	VI
AL 333_9	RSG	54	1	0	0	0	1	SUPERFICIAL	II/III
AL 333_10	Vi	59-64	0	0	0	2	2	DEEP	VI
AL 334_1	SS	26	0	0	1	0	1	DEEP	V
AL 334_2	SS	33-40	1	1	0	0	2	SUPERFICIAL	II/III-IV
AL 334_3	MPa	45	0	1	0	0	1	SUPERFICIAL	IV
AL 334_4	Au	51	0	0	0	1	1	DEEP	VI
AL 356_1	M	20	1	0	0	0	1	SUPERFICIAL	II/III
AL 356_2	SS	39	0	0	0	1	1	DEEP	VI
AL 356_3	SS	41	0	2	0	0	2	SUPERFICIAL	IV
AL 356_4	SS	43	0	0	0	1	1	DEEP	VI
AL 356_5	Vi	49	0	0	0	1	1	DEEP	VI
AL 356_6	RSG	63	0	0	0	1	1	DEEP	VI
AL 357_1	M	25	0	0	0	1	1	DEEP	VI
AL 357_2	SS	31	1	0	0	0	1	SUPERFICIAL	VI
AL 357_3	M	34	0	0	1	0	1	DEEP	V
AL 357_4	SS	39	0	0	0	1	1	DEEP	VI
AL 357_5	SS	39	0	1	0	0	1	SUPERFICIAL	IV
AL 357_6	RSG	42	0	0	1	0	1	DEEP	V
AL 357_7	Vi	63	1	0	0	0	1	SUPERFICIAL	II/III
AL 358_1	SS	35	0	0	0	1	1	DEEP	VI
AL 358_2	SS	39	0	0	0	1	1	DEEP	VI
AL 358_3	RSD	45	0	1	0	0	1	SUPERFICIAL	IV
AL 358_4	Vi	63	1	0	0	0	1	SUPERFICIAL	II/III
AL 358_5	Au	68	0	1	0	0	1	SUPERFICIAL	IV
AL 396_1	SS	15-16	0	0	1	1	2	DEEP	VI
AL 396_2	SS	29	0	0	0	1	1	DEEP	VI
AL 396_3	Vi	43	0	0	1	0	1	DEEP	V
AL 396_4	Vi	59	0	0	0	1	1	DEEP	VI
AL_399_1	SS	27	1	0	0	0	1	SUPERFICIAL	II/III
AL_399_2	SS	30	0	0	0	1	1	DEEP	VI
AL_399_3	Au	56	1	0	0	0	1	SUPERFICIAL	II/III
AL 400_1	SS	18	1	0	0	0	1	SUPERFICIAL	II/III
AL 400_2	M	22	1	0	0	0	1	SUPERFICIAL	II/III
AL 400_3	SS	26	0	0	0	1	1	DEEP	VI
AL 400_4	Cg	30	1	0	0	0	1	SUPERFICIAL	II/III
AL 400_5	SS	36	0	0	0	1	1	DEEP	VI
AL 400_6	Au	51	0	0	0	1	1	DEEP	VI
