# Supplementary material for: A stochastic framework of neurogenesis underlies the assembly of neocortical cytoarchitecture
Source: eLife. 2019 Nov 18;8:e51381. doi: 10.7554/eLife.51381 (PMC6968929; doi:10.7554/eLife.51381)
Supplement: Figure 2—source data 1. [file elife-51381-fig2-data1.xlsx]

## Sheet: Sheet1
> 2 CELLS LINEAGES
LINEAGE ID	SECTIONS	AREA	II/III	IV	V	VI	TOT	LINEAGE TYPE	Layers
GC906_1	21-22-23	SS	1	2	0	1	4	TRANSLAMINAR	II/III-IV-VI
GC906_2	23-24-25	SS	6	3	1	0	10	TRANSLAMINAR	II/III to V
GC906_3	23-24-25	M	2	1	1	0	4	TRANSLAMINAR	II/III to V
GC906_4	25-26-27	SS	0	5	0	0	5	SUPERFICIAL	IV
GC906_5	27-28	Cg	1	4	3	0	8	TRANSLAMINAR	II/III to V
GC906_6	29	SS	1	2	0	0	3	SUPERFICIAL	II/III-IV
GC906_7	31-32-33-34	SS/MOTOR Border	3	2	3	1	9	TRANSLAMINAR	II/III to VI
GC906_8	40-41-42	motor	3	2	0	3	8	TRANSLAMINAR	II/III-IV-VI
GC906_9	40-41-42-43	SS	4	3	2	2	11	TRANSLAMINAR	II/III to VI
GC906_10	43-44	M	2	1	0	2	5	TRANSLAMINAR	II/III-IV-VI
GC906_11	40-41	SS2	0	7	0	0	7	SUPERFICIAL	IV
GC906_12	46-47-49	SS/visual border Parietal	0	0	0	3	3	DEEP	VI
GC906_14	55-56	Vi	0	0	0	6	6	DEEP	VI
GC906_15	54-55-56	Vi	0	2	2	1	5	TRANSLAMINAR	IV to VI
GC906_16	S52-53	Vi	1	3	0	2	6	TRANSLAMINAR	II/III-IV-VI
GC906_17	53-54	Vi	0	4	0	1	5	TRANSLAMINAR	IV-VI
GC906_18	55-56	Auditory	2	2	0	2	6	TRANSLAMINAR	II/III-IV-VI
GC907_1	19-20-21	M	5	2	0	2	9	TRANSLAMINAR	II/III-IV-VI
GC907_2	20-21-22	SS	0	0	3	2	5	DEEP	V-VI
GC907_3	26-27-28	M	1	1	3	0	5	TRANSLAMINAR	II/III to V
GC907_4	27-28-29-30	SS	5	2	2	0	9	TRANSLAMINAR	II/III to V
GC907_5	49-50	Vi/CAUDAL SS	2	2	1	1	6	TRANSLAMINAR	II/III to VI
GC908_1	20-21-22	M	0	0	0	3	3	DEEP	VI
GC908_2	21-22-23-24	M	2	1	4	2	9	TRANSLAMINAR	II/III to VI
GC908_3	26-27-28	SS	3	2	0	0	5	SUPERFICIAL	II/III-IV
GC908_4	28-29	SS	0	2	1	1	4	TRANSLAMINAR	IV to VI
GC908_5	36-37-38	M	0	0	0	5	5	DEEP	VI
GC908_6	36-37	SS	0	5	0	0	5	SUPERFICIAL	IV
GC908_8	30-31	SS	1	2	0	2	5	TRANSLAMINAR	II/III-IV-VI
GC908_10	32-33-34	SS	1	4	0	0	5	SUPERFICIAL	II/III-IV
GC908_11	43-44-45-46	Vi	2	2	3	0	7	TRANSLAMINAR	II/III to V
GC967_1	32-34	M	4	1	0	2	7	TRANSLAMINAR	II/III-IV-VI
GC967_2	35	SS	0	3	0	0	3	SUPERFICIAL	IV
GC967_3	36-37-38	SS	2	3	0	0	5	SUPERFICIAL	II/III-IV
GC967_4	41-42	SS	0	4	0	1	5	TRANSLAMINAR	IV-VI
GC967_5	44-45-46	RSD/retrospinal	1	1	1	3	6	TRANSLAMINAR	II/III to VI
GC967_6	48-49	SS	0	0	4	0	4	DEEP	V
GC967_7	59-60-61	Vi	0	2	3	1	6	TRANSLAMINAR	IV to VI
GC967_8	69-70-71-72	Vi	0	0	0	5	5	DEEP	VI
GC967_9	30-31-33	SS	2	2	0	1	5	TRANSLAMINAR	II/III-IV-VI
GC967_10	30-31-32	SS	5	2	0	1	8	TRANSLAMINAR	II/III-IV-VI
GC967_11	29-30-31-32	SS	1	4	0	1	6	TRANSLAMINAR	II/III-IV-VI
GC967_12	30-31	SS	0	4	0	0	4	SUPERFICIAL	IV
GC967_13	33-34-35-36-37-38	SS	2	1	2	5	10	TRANSLAMINAR	II/III to VI
GC967_14	35-36-37	SS	0	6	0	0	6	SUPERFICIAL	IV
GC967_15	36-37	SS	1	3	0	0	4	SUPERFICIAL	II/III-IV
GC967_16	37-38	SS/MOTOR	2	2	0	0	4	SUPERFICIAL	II/III-IV
GC967_17	39-40	SS	0	0	3	2	5	DEEP	V-VI
GC967_18	41-42	M	7	2	3	2	14	TRANSLAMINAR	II/III to VI
GC967_19	42-43	SS	2	2	0	1	5	TRANSLAMINAR	II/III-IV-VI
GC967_20	46-47-48	SS	3	3	0	0	6	SUPERFICIAL	II/III-IV
GC967_21	48-49	Au	3	1	0	0	4	SUPERFICIAL	II/III-IV
GC967_22	49-50	Vi	1	2	0	2	5	TRANSLAMINAR	II/III-IV-VI
GC967_23	56-57	Vi	0	3	0	1	4	TRANSLAMINAR	IV-VI
GC967_24	56-57-58-59	Vi	0	3	1	1	5	TRANSLAMINAR	IV to VI
GC994-1R	26-28	SS	3	1	1	0	5	TRANSLAMINAR	II/III to V
GC994-2R	36-38	RSG	3	1	1	3	8	TRANSLAMINAR	II/III to VI
GC994-4R	37-38	SS	3	4	1	1	9	TRANSLAMINAR	II/III to VI
GC994-6R	41-42	SS	4	3	4	0	11	TRANSLAMINAR	II/III to V
GC994-3R	44-45	SS	2	2	0	3	7	TRANSLAMINAR	II/III-IV-VI
GC994-5R	47-51	SS	7	2	0	3	12	TRANSLAMINAR	II/III-IV-VI
GC994-7R	56-68	Vi	0	0	0	4	4	DEEP	VI
GC994-8R	58-60	Vi	0	0	0	4	4	DEEP	VI
GC998-2L	25-28	M	4	2	2	1	9	TRANSLAMINAR	II/III to VI
GC998-8R	52-54	Vi	1	1	1	2	5	TRANSLAMINAR	II/III to VI
GC998-3R	25-28	Cg	1	2	0	3	6	TRANSLAMINAR	II/III-IV-VI
GC998-5R	37-39	SS	2	2	0	1	5	TRANSLAMINAR	II/III-IV-VI
GC998-6L	40-41	SS	5	2	0	2	9	TRANSLAMINAR	II/III-IV-VI
GC998-7R	40-42	SS	3	3	0	0	6	SUPERFICIAL	II/III-IV
GC998-9L	52-54	Au	6	1	0	0	7	SUPERFICIAL	II/III-IV
GC997-1R	27-29	SS	4	1	2	1	8	TRANSLAMINAR	II/III to VI
GC997-2R	33-34	SS	0	4	1	0	5	TRANSLAMINAR	IV-V
GC997-5L	23-25	SS	0	0	0	5	5	DEEP	VI
2 CELL LINEAGES
			Neuron number /layer
LINEAGE ID	SECTION	AREA	II/III	IV	V	VI	TOT	LINEAGE TYPE	Layers
GC906_13	53-54	visual	0	0	0	2	2	DEEP	VI
GC_906-23R	29-30	M	0	0	0	2	2	DEEP	VI
GC_906-29L	56-57	Au	0	0	0	2	2	DEEP	VI
GC_906-31L	61	Au	0	0	1	1	2	DEEP	V-VI
GC_906-33L	24	SS	0	0	0	2	2	DEEP	VI
GC_906-35L	25-26	SS	0	0	1	1	2	DEEP	V-VI
GC_906-36R	29-31	SS	0	0	1	1	2	DEEP	V-VI
GC_906-37R	35	M	0	0	0	2	2	DEEP	VI
GC_906-38L	36	M	0	0	0	2	2	DEEP	VI
GC_906-41R	45	Au	1	1	0	0	2	SUPERFICIAL	II/III-IV
GC_906-61L	61	RSG	0	0	2	0	2	DEEP	V
GC_907-9L	24	SS	0	1	1	0	2	TRASLAMINAR	IV-V
GC_907-14R	31-32	SS	0	0	2	0	2	DEEP	V
GC908_Clone7	36	SS	0	0	0	2	2	DEEP	VI
GC_908-13R	24-26	SS	0	2	0	0	2	SUPERFICIAL	IV
GC_908-14R	29-30	SS	0	2	0	0	2	SUPERFICIAL	IV
GC_908-15R	40	SS	0	0	0	2	2	DEEP	VI
GC_908-16R	40-41	M	0	0	0	2	2	DEEP	VI
GC_908-17L	45	RSG	0	0	0	2	2	DEEP	VI
GC_908-19L	48	RSG	0	0	0	2	2	DEEP	VI
GC_967-26R	25	SS	0	0	2	0	2	DEEP	V
GC_967-29R	40	RSG	0	0	1	1	2	DEEP	V-VI
GC_967-36R	64	Au	0	0	1	1	2	DEEP	V-VI
GC_967-37L	64	Au	0	0	1	1	2	DEEP	V-VI
GC_967-39L	29-30	SS	0	1	1	0	2	TRANSLAMINAR	IV-V
GC_967-44R	62	Vi	0	2	0	0	2	SUPERFICIAL	IV
GC_994-9L	18	Cg	0	0	0	2	2	DEEP	VI
GC997-3L	37	SS	0	0	0	2	2	DEEP	VI
GC997-4L	69	V2MM	0	0	0	2	2	DEEP	VI
GC_997-7L	26-27	SS	0	0	0	2	2	DEEP	VI
SINGLE CELL LINEAGES
			LAMINAR DISTRIBUTION
LINEAGE ID	SECTION	AREA	II/III	IV	V	VI	TOT	LINEAGE TYPE	Layers
GC_994-10R	19	M	0	0	0	1	1	DEEP	VI
GC_994-11R	21	SS	0	0	1	0	1	DEEP	V
GC_994-12L	24	SS	0	0	0	1	1	DEEP	VI
GC_994-13L	25	SS	0	0	0	1	1	DEEP	VI
GC_994-14R	33	SS	0	1	0	0	1	SUPERFICIAL	IV
GC_994-15R	36	SS	0	1	0	0	1	SUPERFICIAL	IV
GC_994-16L	37	SS	0	0	0	1	1	DEEP	VI
GC_997-6R	25	Cg	0	1	0	0	1	SUPERFICIAL	IV
GC_997-8L	30	Cg2	0	0	0	1	1	DEEP	VI
GC_997-9R	31	SS	0	0	1	0	1	DEEP	V
GC_997-10L	33	SS				1	1	DEEP	VI
GC_997-11R	33	M				1	1	DEEP	VI
GC_997-12L	37	SS		1			1	SUPERFICIAL	IV
GC_997-13L	47	SS				1	1	DEEP	VI
GC_997-14R	64	Vi			1		1	DEEP	V
GC_998-10R	27	SS			1		1	DEEP	V
GC_998-11L	36	SS				1	1	DEEP	VI
GC_998-12L	47	SS				1	1	DEEP	VI
GC_906-19L	21	M		1			1	SUPERFICIAL	IV
GC_906-20R	22	SS		1			1	SUPERFICIAL	IV
GC_906-20R	22	SS		1			1	SUPERFICIAL	IV
GC_906-21L	23	Cg		1			1	SUPERFICIAL	IV
GC_906-22R	25	SS				1	1	DEEP	VI
GC_906-24R	35	Cg				1	1	DEEP	VI
GC_906-25L	47	Vi				1	1	DEEP	VI
GC_906-26R	51	RSG				1	1	DEEP	VI
GC_906-27R	53	Vi		1			1	SUPERFICIAL	IV
GC_906-28L	56	Vi				1	1	DEEP	VI
GC_906-30L	60	Vi				1	1	DEEP	VI
GC_906-32L	21	Cg		1			1	SUPERFICIAL	IV
GC_906-34R	25	M				1	1	DEEP	VI
GC_906-39R	41	SS				1	1	DEEP	VI
GC_906-40R	43	RSD				1	1	DEEP	VI
GC_906-42R	45	RSG				1	1	DEEP	VI
GC_906-43R	48	Vi				1	1	DEEP	VI
GC_906-44R	56	Vi				1	1	DEEP	VI
GC_907-7L	23	M		1			1	SUPERFICIAL	IV
GC_907-8L	24	M			1		1	DEEP	V
GC_907-10R	24	SS	1				1	SUPERFICIAL	II/III
GC_907-11R	26	M				1	1	DEEP	VI
GC_907-12L	30	Cg				1	1	DEEP	VI
CG_907-13R	31	SS				1	1	DEEP	VI
GC_907-15R	48	Vi	1				1	SUPERFICIAL	II/III
GC_907-16R	49	Vi			1		1	DEEP	V
GC_907-17L	53	RSG				1	1	DEEP	VI
GC_907-18R	54	Au	1				1	SUPERFICIAL	II/III
GC_907-19L	56	Au				1	1	DEEP	VI
GC_908-12R	20	SS				1	1	DEEP	VI
GC_908-18L	48	Vi				1	1	DEEP	VI
GC_967-25L	23	SS			1		1	DEEP	V
GC_967-27R	31	SS				1	1	DEEP	VI
GC_967-28R	33	SS		1			1	SUPERFICIAL	IV
GC_967-30L	41	SS				1	1	DEEP	VI
GC_967-31L	43	SS				1	1	DEEP	VI
GC_967-32R	52	SS			1		1	DEEP	V
GC_967-33R	60	Vi				1	1	DEEP	VI
GC_967-34L	61	Au				1	1	DEEP	VI
GC_967-35R	64	Vi			1		1	DEEP	V
GC_967-38R	24	M			1		1	DEEP	V
GC_967-40L	30	SS				1	1	DEEP	VI
GC_967-41R	40	SS				1	1	DEEP	VI
GC_967-42R	40	SS				1	1	DEEP	VI
GC_967-43R	46	SS			1		1	DEEP	V
