# Supplementary material for: A stochastic framework of neurogenesis underlies the assembly of neocortical cytoarchitecture
Source: eLife. 2019 Nov 18;8:e51381. doi: 10.7554/eLife.51381 (PMC6968929; doi:10.7554/eLife.51381)
Supplement: Figure 3—source data 1. [file elife-51381-fig3-data1.xlsx]

## Sheet: ALL LINEAGES
			# Red cells					# Green cells
Brain #	LINEAGE ID	AREA	VI	V	IV	II-III	Subtotal red	VI	V	IV	II-III	Subtotal green	TOTAL	Type	Layers
1	15-1033-A	Auditory	2	0	1	1	4	2	0	0	0	2	6	TRANSLAMINAR	II/III-IV-VI
1	15-1033-B	Visual	3	1	2	3	9	3	2	5	4	14	23	TRANSLAMINAR	II/III to VI
1	15-1033-D	Visual	1	1	1	1	4	1	5	0	4	10	14	TRANSLAMINAR	II/III to VI
1	15-1033-E	Somatosensory	2	1	3	2	8	3	1	5	8	17	25	TRANSLAMINAR	II/III to VI
1	15-1033-F	Somatosensory	1	3	5	2	11	2	0	0	0	2	13	TRANSLAMINAR	II/III to VI
1	15-1033-G	Somatosensory	1	0	0	0	1	1	0	0	0	1	2	DEEP	VI
1	15-1033-H	Motor	3	1	1	0	5	0	5	1	8	14	19	TRANSLAMINAR	II/III to VI
1	15-1033-J	Motor	1	1	0	1	3	2	0	0	0	2	5	TRANSLAMINAR	II/III-IV-VI
6	15-1034 A	Visual	1	0	0	0	1	0	0	2	2	4	5	TRANSLAMINAR	II/III-IV-VI
6	15-1034-c	Auditory	0	0	1	1	2	0	1	0	0	1	3	TRANSLAMINAR	II/III-IV-V
6	15-1034-F	Visual	0	1	4	1	6	1	1	0	0	2	8	TRANSLAMINAR	II/III to VI
6	15-1034-G	Auditory	1	2	1	5	9	1	2	1	2	6	15	TRANSLAMINAR	II/III to VI
6	15-1034-h	Auditory	3	0	0	0	3	1	1	1	2	5	8	TRANSLAMINAR	II/III to VI
6	15-1034-K	Somatosensory	1	1	1	1	4	0	3	0	0	3	7	TRANSLAMINAR	II/III to VI
6	15-1034-M	Somatosensory	2	0	0	0	2	2	0	2	3	7	9	TRANSLAMINAR	II/III-IV-VI
6	15-1034-N	Somatosensory	1	0	2	2	5	2	0	0	0	2	7	TRANSLAMINAR	II/III-IV-VI
2	197-E1	Visual	2	0	0	0	2	1	1	2	1	5	7	TRANSLAMINAR	II/III to VI
2	197-E2	Visual	2	0	0	0	2	3	2	6	2	13	15	TRANSLAMINAR	II/III to VI
3	45-A	Visual	2	0	2	3	7	4	0	0	0	4	11	TRANSLAMINAR	II/III-IV-VI
3	45-B	Visual	0	1	1	2	4	0	1	0	0	1	5	TRANSLAMINAR	II/III-IV-V
3	45-G	Somatosensory	0	0	4	4	8	1	0	0	0	1	9	TRANSLAMINAR	II/III-IV-VI
3	45-H	Somatosensory	3	0	0	0	3	0	1	1	2	4	7	TRANSLAMINAR	II/III to VI
3	45-I	Somatosensory	3	1	1	2	7	0	3	0	0	3	10	TRANSLAMINAR	II/III to VI
3	45-k	Auditory	0	0	3	6	9	1	1	0	0	2	11	TRANSLAMINAR	II/III to VI
3	45-O	Somatosensory	0	1	0	0	1	0	1	1	2	4	5	TRANSLAMINAR	II/III-IV-V
3	45-P	Motor	0	0	4	2	6	0	1	0	0	1	7	TRANSLAMINAR	II/III-IV-V
2	197-B	Auditory	0	1	7	4	12	2	1	1	1	5	17	TRANSLAMINAR	II/III to VI
2	197-D	Auditory	0	1	5	0	6	2	1	2	7	12	18	TRANSLAMINAR	II/III to VI
2	197-G	Auditory	0	3	1	2	6	2	0	0	0	2	8	TRANSLAMINAR	II/III to VI
2	197-H	Auditory	1	1	0	0	2	0	4	2	6	12	14	TRANSLAMINAR	II/III to VI
2	197-I	Visual	0	1	3	3	7	2	0	0	0	2	9	TRANSLAMINAR	II/III to VI
2	197-m	Somatosensory	1	0	0	0	1	1	1	1	0	3	4	TRANSLAMINAR	IV-V-VI
2	197-L	Somatosensory	1	0	2	4	7	0	1	0	0	1	8	TRANSLAMINAR	II/III to VI
4	207-C	Visual	1	3	2	2	8	1	0	1	0	2	10	TRANSLAMINAR	II/III to VI
4	207-D	Auditory	0	2	2	3	7	1	1	1	3	6	13	TRANSLAMINAR	II/III to VI
4	207-e	Auditory	2	0	2	2	6	2	0	0	0	2	8	TRANSLAMINAR	II/III-IV-VI
4	207-H	Visual	2	0	0	0	2	0	2	1	3	6	8	TRANSLAMINAR	II/III-IV-VI
4	207-J	Auditory	2	0	0	0	2	2	0	0	0	2	4	DEEP	VI
4	207-K	Visual	0	5	3	1	9	2	2	3	4	11	20	TRANSLAMINAR	II/III to VI
4	207-L	Somatosensory	1	0	0	0	1	2	0	4	2	8	9	TRANSLAMINAR	II/III-IV-VI
4	207-N	Motor	3	2	2	21	28	3	1	1	9	14	42	TRANSLAMINAR	II/III to VI
4	207-O	Somatosensory	0	1	2	4	7	1	0	0	0	1	8	TRANSLAMINAR	II/III to VI
4	207-P	Somatosensory	4	1	3	7	15	3	2	1	3	9	24	TRANSLAMINAR	II/III to VI
4	207-Q	Somatosensory	1	2	2	5	10	2	1	3	2	8	18	TRANSLAMINAR	II/III to VI
4	207-S	Somatosensory	3	1	3	2	9	2	0	0	0	2	11	TRANSLAMINAR	II/III to VI
4	207-U	Somatosensory	0	1	0	0	1	1	0	0	0	1	2	DEEP	V-VI
4	207-V	Somatosensory	0	1	0	0	1	0	0	2	1	3	4	TRANSLAMINAR	II/III-IV-V
4	207-W	Somatosensory	2	0	0	0	2	1	0	0	0	1	3	DEEP	VI
4	207-X	Somatosensory	1	0	0	0	1	1	3	5	11	20	21	TRANSLAMINAR	II/III to VI
5	352-B	Visual	0	1	1	2	4	0	1	1	3	5	9	TRANSLAMINAR	II/III-IV-V
5	352-C	Visual	3	2	1	2	8	2	3	3	6	14	22	TRANSLAMINAR	II/III to VI
5	352-D	Somatosensory	1	0	0	0	1	2	1	5	3	11	12	TRANSLAMINAR	II/III to VI
5	352-E	Somatosensory	0	1	0	0	1	0	0	3	4	7	8	TRANSLAMINAR	II/III-IV-V
7	15-1030 A	Visual	1	0	0	0	1	1	0	3	4	8	9	TRANSLAMINAR	II/III-IV-VI
7	15-1030 C	Somatosensory	0	3	0	0	3	2	0	1	1	4	7	TRANSLAMINAR	II/III to VI
7	15-1030 D	Somatosensory	2	0	2	3	7	4	0	2	2	8	15	TRANSLAMINAR	II/III-IV-VI
7	15-1030 E	Somatosensory	0	0	3	4	7	0	1	0	0	1	8	TRANSLAMINAR	II/III-IV-V
7	15-1030 F	Somatosensory	1	0	5	0	6	2	0	0	0	2	8	TRANSLAMINAR	IV-VI
7	15-1030 G	Somatosensory	2	0	0	0	2	2	0	0	0	2	4	DEEP	VI
8	15-1031 A	Visual	1	0	2	2	5	1	0	6	1	8	13	TRANSLAMINAR	II/III-IV-VI
8	15-1031 B	Visual	2	0	0	0	2	1	2	2	0	5	7	TRANSLAMINAR	IV-V-VI
8	15-1031 C	Auditory	0	0	1	5	6	1	0	0	0	1	7	TRANSLAMINAR	II/III-IV-VI
8	15-1031 D	Visual	1	1	1	1	4	2	1	3	1	7	11	TRANSLAMINAR	II/III to VI
8	15-1031 E	Somatosensory	1	0	0	0	1	1	0	4	2	7	8	TRANSLAMINAR	II/III-IV-VI
8	15-1031 F	MPtA	3	1	3	4	11	3	3	6	0	12	23	TRANSLAMINAR	II/III to VI
8	15-1031 G	Somatosensory	1	1	4	1	7	1	1	1	0	3	10	TRANSLAMINAR	II/III to VI
8	15-1031 I	Somatosensory	0	2	3	6	11	1	0	0	0	1	12	TRANSLAMINAR	II/III to VI
8	15-1031 H	Somatosensory	2	0	0	0	2	4	0	0	0	4	6	DEEP	VI
9	15-1032 A	Visual	1	0	4	1	6	2	0	2	2	6	12	TRANSLAMINAR	II/III-IV-VI
9	15-1032 B	Somatosensory	1	0	2	0	3	0	2	0	0	2	5	TRANSLAMINAR	IV-V-VI
9	15-1032 C	Somatosensory	0	2	3	4	9	1	0	0	0	1	10	TRANSLAMINAR	II/III to VI
9	15-1032 D	Somatosensory	0	2	5	2	9	2	0	6	0	8	17	TRANSLAMINAR	II/III to VI
9	15-1032 E	Somatosensory	0	2	1	2	5	0	0	0	0	0	5	TRANSLAMINAR	IV-V-VI
9	15-1032 F	Motor	2	0	0	0	2	2	2	2	0	6	8	TRANSLAMINAR	IV-V-VI
10	15-1035 A	Visual	3	0	0	0	3	2	1	3	3	9	12	TRANSLAMINAR	II/III to VI
10	15-1035 B	Visual	0	2	3	0	5	4	0	0	0	4	9	TRANSLAMINAR	IV-V-VI
10	15-1035 C	Somatosensory	0	0	2	2	4	1	0	0	0	1	5	TRANSLAMINAR	II/III-IV-VI
10	15-1035 D	Somatosensory	0	0	2	0	2	2	0	0	0	2	4	TRANSLAMINAR	IV-VI
11	15-1036 A	Visual	3	1	3	0	7	1	3	6	2	12	19	TRANSLAMINAR	II/III to VI
11	15-1036 B	Visual	2	0	0	0	2	1	0	3	2	6	8	TRANSLAMINAR	II/III-IV-VI
11	15-1036 C	Auditory	0	0	1	0	1	0	0	4	1	5	6	SUPERFICIAL	II/III-IV
11	15-1036 D	Auditory	0	1	3	4	8	1	0	3	0	4	12	TRANSLAMINAR	II/III to VI
11	15-1036 E	Auditory	0	1	4	0	5	1	0	0	0	1	6	TRANSLAMINAR	IV-V-VI
11	15-1036 F	Somatosensory	0	0	0	0	0	0	0	6	0	6	6	SUPERFICIAL	IV
11	15-1036 G	Somatosensory	0	2	3	0	5	1	1	0	0	2	7	TRANSLAMINAR	IV-V-VI
12	15-1037 A	Ectorhinal	0	1	3	0	4	1	0	0	0	1	5	TRANSLAMINAR	IV-V-VI
12	15-1037 B	Visual	3	1	7	2	13	4	0	0	0	4	17	TRANSLAMINAR	II/III to VI
12	15-1037 C	Visual	0	2	2	2	6	0	2	3	5	10	16	TRANSLAMINAR	II/III-IV-V
12	15-1037 D	Visual	0	1	0	0	1	0	0	5	0	5	6	TRANSLAMINAR	IV-V
12	15-1037 E	Somatosensory	0	2	2	3	7	1	0	0	0	1	8	TRANSLAMINAR	II/III to VI
12	15-1037 F	Somatosensory	1	0	0	0	1	1	0	3	4	8	9	TRANSLAMINAR	II/III-IV-VI
12	15-1037 G	Somatosensory	2	0	3	0	5	1	1	2	1	5	10	TRANSLAMINAR	II/III to VI
12	15-1037 H	Somatosensory	3	3	4	0	10	2	4	4	3	13	23	TRANSLAMINAR	II/III to VI
12	15-1037 I	Somatosensory	2	1	1	2	6	0	1	0	0	1	7	TRANSLAMINAR	II/III to VI
12	15-1037 J	Somatosensory	2	0	0	0	2	2	0	0	0	2	4	DEEP	VI
13	15-1038 A	Visual	2	0	2	1	5	0	2	5	0	7	12	TRANSLAMINAR	II/III to VI
13	15-1038 B	LPtA	2	0	4	7	13	2	0	0	0	2	15	TRANSLAMINAR	II/III-IV-VI
13	15-1038 C	Somatosensory	0	0	7	3	10	0	1	0	0	1	11	TRANSLAMINAR	II/III-IV-V
13	15-1038 D	Somatosensory	0	0	2	4	6	0	0	3	1	4	10	SUPERFICIAL	II/III-IV
13	15-1038 F	Somatosensory	3	0	2	0	5	3	3	0	0	6	11	TRANSLAMINAR	IV-V-VI
13	15-1038 G	Somatosensory	0	2	1	2	5	1	0	0	0	1	6	TRANSLAMINAR	II/III to VI
13	15-1038 I	Somatosensory	3	0	2	3	8	3	0	0	0	3	11	TRANSLAMINAR	II/III-IV-VI
13	15-1038 J	Somatosensory	0	0	0	0	0	0	2	4	1	7	7	TRANSLAMINAR	II/III-IV-V
14	15-1039 A	Visual	4	1	2	1	8	0	2	18	1	21	29	TRANSLAMINAR	II/III to VI
14	15-1039 B	Auditory	0	2	3	2	7	2	0	0	0	2	9	TRANSLAMINAR	II/III to VI
14	15-1039 C	Auditory	0	0	2	2	4	2	0	0	0	2	6	TRANSLAMINAR	II/III-IV-VI
14	15-1039 D	Somatosensory	1	0	1	0	2	0	0	3	0	3	5	TRANSLAMINAR	IV-VI
14	15-1039 E	Auditory	0	2	0	0	2	1	0	2	4	7	9	TRANSLAMINAR	II/III to VI
14	15-1039 F	Somatosensory	5	1	2	1	9	2	0	0	0	2	11	TRANSLAMINAR	II/III to VI
14	15-1039 G	Somatosensory	1	0	3	2	6	2	0	0	0	2	8	TRANSLAMINAR	II/III-IV-VI
15	15-1040 A	Visual	1	0	2	2	5	2	0	0	0	2	7	TRANSLAMINAR	II/III-IV-VI
16	15-1042 A	Somatosensory	1	0	0	0	1	1	1	3	3	8	9	TRANSLAMINAR	II/III to VI
17	15-1044 B	Visual	0	3	2	1	6	1	1	5	0	7	13	TRANSLAMINAR	II/III to VI
17	15-1044 C	Visual	1	0	4	1	6	3	0	0	0	3	9	TRANSLAMINAR	II/III-IV-VI
17	15-1044 D	Visual	3	0	0	0	3	3	2	2	6	13	16	TRANSLAMINAR	II/III to VI
17	15-1044 E	Somatosensory	2	0	5	1	8	3	0	2	1	6	14	TRANSLAMINAR	II/III-IV-VI
17	15-1044 F	Somatosensory	2	0	0	0	2	0	2	2	1	5	7	TRANSLAMINAR	II/III to VI
18	15-1045 B	Somatosensory	2	0	0	0	2	0	3	3	2	8	10	TRANSLAMINAR	II/III to VI
18	15-1045 C	Motor	1	1	2	2	6	1	1	0	0	2	8	TRANSLAMINAR	II/III to VI
18	15-1045 D	Visual	1	1	0	0	2	1	0	6	3	10	12	TRANSLAMINAR	II/III to VI
18	15-1045 E	Visual	1	1	1	3	6	2	0	2	0	4	10	TRANSLAMINAR	II/III to VI
19	15-1046 A	Visual	2	0	0	0	2	0	1	5	0	6	8	TRANSLAMINAR	IV-V-VI
19	15-1046 B	Somatosensory	0	1	3	0	4	2	0	0	0	2	6	TRANSLAMINAR	IV-V-VI
20	15-1047 A	Auditory	1	0	0	0	1	0	0	2	2	4	5	TRANSLAMINAR	II/III-IV-VI
20	15-1047 B	Visual	2	2	1	2	7	2	0	0	0	2	9	TRANSLAMINAR	II/III to VI
20	15-1047 C	Visual	1	1	1	1	4	1	0	0	1	2	6	TRANSLAMINAR	II/III to VI
20	15-1047 D	Somatosensory	0	1	9	0	10	0	2	2	1	5	15	TRANSLAMINAR	II/III-IV-V
20	15-1047 E	Somatosensory	0	3	1	2	6	1	0	0	0	1	7	TRANSLAMINAR	II/III to VI
20	15-1047 F	Somatosensory	1	0	4	0	5	2	0	0	0	2	7	TRANSLAMINAR	IV-VI
20	15-1047 G	Motor	2	0	0	0	2	2	0	0	0	2	4	DEEP	VI
20	15-1047 H	Motor	0	1	1	2	4	2	1	1	1	5	9	TRANSLAMINAR	II/III to VI
21	15-1049 A	Visual	0	1	2	1	4	1	0	0	0	1	5	TRANSLAMINAR	II/III to VI
21	15-1049 B	Somatosensory	1	0	0	0	1	1	0	3	1	5	6	TRANSLAMINAR	II/III-IV-VI
22	15-1050 A	Auditory	0	1	1	2	4	0	1	2	2	5	9	TRANSLAMINAR	II/III-IV-V
22	15-1050 B	Auditory	1	0	0	0	1	1	1	2	2	6	7	TRANSLAMINAR	II/III to VI
22	15-1050 C	Somatosensory	0	2	4	3	9	1	0	0	0	1	10	TRANSLAMINAR	II/III to VI
22	15-1050 D	Somatosensory	1	0	0	0	1	0	0	1	0	1	2	TRANSLAMINAR	IV-V
22	15-1050 E	Somatosensory	1	1	0	0	2	3	1	2	4	10	12	TRANSLAMINAR	II/III to VI
22	15-1050 F	Somatosensory	0	1	0	0	1	2	1	4	0	7	8	TRANSLAMINAR	IV-V-VI
23	15-1051 B	Somatosensory	1	0	0	0	1	0	0	5	0	5	6	TRANSLAMINAR	II/III-IV-VI
23	15-1051 C	Visual	3	0	4	2	9	1	1	3	0	5	14	TRANSLAMINAR	II/III to VI
23	15-1051 D	Visual	1	1	0	0	2	0	1	5	4	10	12	TRANSLAMINAR	II/III to VI
24	15-1052 A	Visual	0	1	1	2	4	2	0	0	0	2	6	TRANSLAMINAR	II/III to VI
24	15-1052 B	Visual	1	0	0	0	1	1	1	1	2	5	6	TRANSLAMINAR	II/III to VI
24	15-1052 C	Auditory	3	1	0	5	9	2	0	0	0	2	11	TRANSLAMINAR	II/III-V-VI
24	15-1052 D	Visual	0	1	2	3	6	0	2	0	0	2	8	TRANSLAMINAR	II/III-IV-V
24	15-1052 E	Visual	3	1	2	0	6	2	0	6	7	15	21	TRANSLAMINAR	II/III to VI
24	15-1052 F	Auditory	2	0	0	0	2	0	0	2	3	5	7	TRANSLAMINAR	II/III-IV-VI
24	15-1052 G	Somatosensory	1	0	3	0	4	2	0	0	0	2	6	TRANSLAMINAR	IV-VI
24	15-1052 H	Somatosensory	1	1	0	0	2	0	0	1	3	4	6	TRANSLAMINAR	II/III to VI
24	15-1052 I	Somatosensory	1	0	2	5	8	0	1	0	0	1	9	TRANSLAMINAR	II/III to VI
25	15-1053 A	Somatosensory	2	0	0	0	2	0	1	2	3	6	8	TRANSLAMINAR	II/III to VI
25	15-1053 B	Somatosensory	0	0	2	3	5	2	0	0	0	2	7	TRANSLAMINAR	II/III-IV-VI
25	15-1053 C	Somatosensory	1	0	2	3	6	0	1	0	0	1	7	TRANSLAMINAR	II/III to VI
25	15-1053 E	Somatosensory	1	0	0	0	1	0	1	1	1	3	4	TRANSLAMINAR	II/III to VI
25	15-1053 F	Visual	2	0	0	0	2	0	1	5	1	7	9	TRANSLAMINAR	II/III to VI
26	204 A	Auditory	2	0	1	2	5	0	1	4	0	5	10	TRANSLAMINAR	II/III to VI
26	204 B	Somatosensory	4	4	6	4	18	5	1	7	2	15	33	TRANSLAMINAR	II/III to VI
26	204 E	Somatosensory	0	2	2	0	4	1	0	2	0	3	7	TRANSLAMINAR	II/III to VI
26	204 G	Visual	2	0	0	0	2	2	4	2	2	10	12	TRANSLAMINAR	II/III to VI
26	204 H	Visual	1	0	2	1	4	0	1	1	2	4	8	TRANSLAMINAR	II/III to VI
27	356 A	Visual	4	3	0	1	8	4	5	2	5	16	24	TRANSLAMINAR	II/III to VI
27	356 B	Visual	2	0	2	0	4	2	0	1	3	6	10	TRANSLAMINAR	II/III-IV-VI
27	356 C	Visual	1	0	2	0	3	0	1	0	0	1	4	TRANSLAMINAR	IV-V-VI
27	356 D	Somatosensory	2	1	2	1	6	1	2	1	3	7	13	TRANSLAMINAR	II/III to VI
28	46 A	Visual	0	2	0	0	2	2	1	4	2	9	11	TRANSLAMINAR	II/III to VI
28	46 B	Visual	1	0	3	2	6	1	4	1	6	12	18	TRANSLAMINAR	II/III to VI
28	46 C	Visual	0	0	1	1	2	0	0	1	3	4	6	SUPERFICIAL	II/III-IV
28	46 D	Visual	1	3	2	2	8	2	2	3	2	9	17	TRANSLAMINAR	II/III to VI
28	46 F	RSD	0	1	0	0	1	0	0	3	5	8	9	TRANSLAMINAR	II/III-IV-V
28	46 G	Somatosensory	1	0	2	1	4	1	0	6	2	9	13	TRANSLAMINAR	II/III-IV-VI
28	46 H	Somatosensory	1	0	0	0	1	2	0	0	0	2	3	DEEP	VI

## Sheet: NEUROGENIC LINEAGES
		# Red cells					# Green cells
Brain #	LINEAGE ID	VI	V	IV	II-III	Subtotal red	VI	V	IV	II-III	Subtotal green	TOTAL	Type	Layers
1	15-1033-A	2	0	1	1	4	2	0	0	0	2	6	TRANSLAMINAR	II/III-IV-VI
1	15-1033-F	1	3	5	2	11	2	0	0	0	2	13	TRANSLAMINAR	II/III to VI
1	15-1033-J	1	1	0	1	3	2	0	0	0	2	5	TRANSLAMINAR	II/III-V-VI
6	15-1034 A	1	0	0	0	1	0	0	2	2	4	5	TRANSLAMINAR	II/III-IV-VI
6	15-1034-F	0	1	4	1	6	1	1	0	0	2	8	TRANSLAMINAR	II/III to VI
6	15-1034-M	2	0	0	0	2	2	0	2	3	7	9	TRANSLAMINAR	II/III-IV-VI
6	15-1034-N	1	0	2	2	5	2	0	0	0	2	7	TRANSLAMINAR	II/III-IV-VI
2	197-E1	2	0	0	0	2	1	1	2	1	5	7	TRANSLAMINAR	II/III to VI
2	197-E2	2	0	0	0	2	3	2	6	2	13	15	TRANSLAMINAR	II/III to VI
3	45-B	0	1	1	2	4	0	1	0	0	1	5	TRANSLAMINAR	II/III to V
3	45-G	0	0	4	4	8	1	0	0	0	1	9	TRANSLAMINAR	II/III-IV-VI
3	45-k	0	0	3	6	9	1	1	0	0	2	11	TRANSLAMINAR	II/III to VI
3	45-O	0	1	0	0	1	0	1	1	2	4	5	TRANSLAMINAR	II/III to V
3	45-P	0	0	4	2	6	0	1	0	0	1	7	TRANSLAMINAR	II/III to V
2	197-G	0	3	1	2	6	2	0	0	0	2	8	TRANSLAMINAR	II/III to VI
2	197-H	1	1	0	0	2	0	4	2	6	12	14	TRANSLAMINAR	II/III to VI
2	197-I	0	1	3	3	7	2	0	0	0	2	9	TRANSLAMINAR	II/III to VI
2	197-m	1	0	0	0	1	1	1	1	0	3	4	TRANSLAMINAR	IV to VI
2	197-L	1	0	2	4	7	0	1	0	0	1	8	TRANSLAMINAR	II/III to VI
4	207-C	1	3	2	2	8	1	0	1	0	2	10	TRANSLAMINAR	II/III to VI
4	207-e	2	0	2	2	6	2	0	0	0	2	8	TRANSLAMINAR	II/III-IV-VI
4	207-H	2	0	0	0	2	0	2	1	3	6	8	TRANSLAMINAR	II/III to VI
4	207-L	1	0	0	0	1	2	0	4	2	8	9	TRANSLAMINAR	II/III-IV-VI
4	207-O	0	1	2	4	7	1	0	0	0	1	8	TRANSLAMINAR	II/III to VI
4	207-S	3	1	3	2	9	2	0	0	0	2	11	TRANSLAMINAR	II/III to VI
4	207-V	0	1	0	0	1	0	0	2	1	3	4	TRANSLAMINAR	II/III to V
4	207-X	1	0	0	0	1	1	3	5	11	20	21	TRANSLAMINAR	II/III to VI
5	352-D	1	0	0	0	1	2	1	5	3	11	12	TRANSLAMINAR	II/III to VI
5	352-E	0	1	0	0	1	0	0	3	4	7	8	TRANSLAMINAR	II/III to V
7	15-1030 A	1	0	0	0	1	1	0	3	4	8	9	TRANSLAMINAR	II/III-IV-VI
7	15-1030 E	0	0	3	4	7	0	1	0	0	1	8	TRANSLAMINAR	II/III to V
7	15-1030 F	1	0	5	0	6	2	0	0	0	2	8	TRANSLAMINAR	IV-VI
8	15-1031 B	2	0	0	0	2	1	2	2	0	5	7	TRANSLAMINAR	IV to VI
8	15-1031 C	0	0	1	5	6	1	0	0	0	1	7	TRANSLAMINAR	II/III-IV-VI
8	15-1031 E	1	0	0	0	1	1	0	4	2	7	8	TRANSLAMINAR	II/III-IV-VI
8	15-1031 I	0	2	3	6	11	1	0	0	0	1	12	TRANSLAMINAR	II/III to VI
8	15-1031 H	2	0	0	0	2	4	0	0	0	4	6	DEEP	VI
9	15-1032 B	1	0	2	0	3	0	2	0	0	2	5	TRANSLAMINAR	IV to VI
9	15-1032 C	0	2	3	4	9	1	0	0	0	1	10	TRANSLAMINAR	II/III to VI
9	15-1032 F	2	0	0	0	2	2	2	2	0	6	8	TRANSLAMINAR	IV to VI
10	15-1035 C	0	0	2	2	4	1	0	0	0	1	5	TRANSLAMINAR	II/III-IV-VI
11	15-1036 B	2	0	0	0	2	1	0	3	2	6	8	TRANSLAMINAR	II/III-IV-VI
11	15-1036 C	0	0	1	0	1	0	0	4	1	5	6	SUPERFICIAL	II/III-IV
11	15-1036 E	0	1	4	0	5	1	0	0	0	1	6	TRANSLAMINAR	IV to VI
11	15-1036 G	0	2	3	0	5	1	1	0	0	2	7	TRANSLAMINAR	IV to VI
12	15-1037 A	0	1	3	0	4	1	0	0	0	1	5	TRANSLAMINAR	IV to VI
12	15-1037 D	0	1	0	0	1	0	0	5	0	5	6	TRANSLAMINAR	IV-V
12	15-1037 E	0	2	2	3	7	1	0	0	0	1	8	TRANSLAMINAR	II/III to VI
12	15-1037 F	1	0	0	0	1	1	0	3	4	8	9	TRANSLAMINAR	II/III-IV-VI
12	15-1037 I	2	1	1	2	6	0	1	0	0	1	7	TRANSLAMINAR	II/III to VI
13	15-1038 B	2	0	4	7	13	2	0	0	0	2	15	TRANSLAMINAR	II/III-IV-VI
13	15-1038 C	0	0	7	3	10	0	1	0	0	1	11	TRANSLAMINAR	II/III to V
13	15-1038 G	0	2	1	2	5	1	0	0	0	1	6	TRANSLAMINAR	II/III to VI
14	15-1039 B	0	2	3	2	7	2	0	0	0	2	9	TRANSLAMINAR	II/III to VI
14	15-1039 C	0	0	2	2	4	2	0	0	0	2	6	TRANSLAMINAR	II/III-IV-VI
14	15-1039 D	1	0	1	0	2	0	0	3	0	3	5	TRANSLAMINAR	IV-VI
14	15-1039 E	0	2	0	0	2	1	0	2	4	7	9	TRANSLAMINAR	II/III to VI
14	15-1039 F	5	1	2	1	9	2	0	0	0	2	11	TRANSLAMINAR	II/III to VI
14	15-1039 G	1	0	3	2	6	2	0	0	0	2	8	TRANSLAMINAR	II/III-IV-VI
15	15-1040 A	1	0	2	2	5	2	0	0	0	2	7	TRANSLAMINAR	II/III-IV-VI
16	15-1042 A	1	0	0	0	1	1	1	3	3	8	9	TRANSLAMINAR	II/III to VI
17	15-1044 F	2	0	0	0	2	0	2	2	1	5	7	TRANSLAMINAR	II/III to VI
18	15-1045 B	2	0	0	0	2	0	3	3	2	8	10	TRANSLAMINAR	II/III to VI
18	15-1045 C	1	1	2	2	6	1	1	0	0	2	8	TRANSLAMINAR	II/III to VI
18	15-1045 D	1	1	0	0	2	1	0	6	3	10	12	TRANSLAMINAR	II/III to VI
19	15-1046 A	2	0	0	0	2	0	1	5	0	6	8	TRANSLAMINAR	IV to VI
19	15-1046 B	0	1	3	0	4	2	0	0	0	2	6	TRANSLAMINAR	IV to VI
20	15-1047 A	1	0	0	0	1	0	0	2	2	4	5	TRANSLAMINAR	II/III-IV-VI
20	15-1047 B	2	2	1	2	7	2	0	0	0	2	9	TRANSLAMINAR	II/III to VI
20	15-1047 C	1	1	1	1	4	1	0	0	1	2	6	TRANSLAMINAR	II/III to VI
20	15-1047 E	0	3	1	2	6	1	0	0	0	1	7	TRANSLAMINAR	II/III to VI
20	15-1047 F	1	0	4	0	5	2	0	0	0	2	7	TRANSLAMINAR	II/III-IV-VI
21	15-1049 A	0	1	2	1	4	1	0	0	0	1	5	TRANSLAMINAR	II/III to VI
21	15-1049 B	1	0	0	0	1	1	0	3	1	5	6	TRANSLAMINAR	II/III-IV-VI
22	15-1050 B	1	0	0	0	1	1	1	2	2	6	7	TRANSLAMINAR	II/III to VI
22	15-1050 C	0	2	4	3	9	1	0	0	0	1	10	TRANSLAMINAR	II/III to VI
22	15-1050 E	1	1	0	0	2	3	1	2	4	10	12	TRANSLAMINAR	II/III to VI
22	15-1050 F	0	1	0	0	1	2	1	4	0	7	8	TRANSLAMINAR	IV to VI
23	15-1051 B	1	0	0	0	1	0	0	5	0	5	6	TRANSLAMINAR	IV-VI
23	15-1051 D	1	1	0	0	2	0	1	5	4	10	12	TRANSLAMINAR	II/III to VI
24	15-1052 A	0	1	1	2	4	2	0	0	0	2	6	TRANSLAMINAR	II/III to VI
24	15-1052 B	1	0	0	0	1	1	1	1	2	5	6	TRANSLAMINAR	II/III to VI
24	15-1052 C	3	1	0	5	9	2	0	0	0	2	11	TRANSLAMINAR	II/III-V-VI
24	15-1052 D	0	1	2	3	6	0	2	0	0	2	8	TRANSLAMINAR	II/III to V
24	15-1052 F	2	0	0	0	2	0	0	2	3	5	7	TRANSLAMINAR	II/III-IV-VI
24	15-1052 G	1	0	3	0	4	2	0	0	0	2	6	TRANSLAMINAR	II/III-IV-VI
24	15-1052 H	1	1	0	0	2	0	0	1	3	4	6	TRANSLAMINAR	II/III to VI
24	15-1052 I	1	0	2	5	8	0	1	0	0	1	9	TRANSLAMINAR	II/III to VI
25	15-1053 A	2	0	0	0	2	0	1	2	3	6	8	TRANSLAMINAR	II/III to VI
25	15-1053 B	0	0	2	3	5	2	0	0	0	2	7	TRANSLAMINAR	II/III-IV-VI
25	15-1053 C	1	0	2	3	6	0	1	0	0	1	7	TRANSLAMINAR	II/III to VI
25	15-1053 E	1	0	0	0	1	0	1	1	1	3	4	TRANSLAMINAR	II/III to VI
25	15-1053 F	2	0	0	0	2	0	1	5	1	7	9	TRANSLAMINAR	II/III to VI
26	204 G	2	0	0	0	2	2	4	2	2	10	12	TRANSLAMINAR	II/III to VI
27	356 C	1	0	2	0	3	0	1	0	0	1	4	TRANSLAMINAR	II/III to VI
28	46 A	0	2	0	0	2	2	1	4	2	9	11	TRANSLAMINAR	II/III to VI
28	46 C	0	0	1	1	2	0	0	1	3	4	6	SUPERFICIAL	II/III-IV
28	46 F	0	1	0	0	1	0	0	3	5	8	9	TRANSLAMINAR	II/III to V
6	15-1034-c	0	0	1	1	2	0	1	0	0	1	3	TRANSLAMINAR	II/III to V
4	207-J	2	0	0	0	2	2	0	0	0	2	4	DEEP	VI
4	207-W	2	0	0	0	2	1	0	0	0	1	3	DEEP	VI
7	15-1030 G	2	0	0	0	2	2	0	0	0	2	4	DEEP	VI
10	15-1035 D	0	0	2	0	2	2	0	0	0	2	4	TRANSLAMINAR	IV-VI
12	15-1037 J	2	0	0	0	2	2	0	0	0	2	4	DEEP	VI
20	15-1047 G	2	0	0	0	2	2	0	0	0	2	4	DEEP	VI
28	46 H	1	0	0	0	1	2	0	0	0	2	3	DEEP	VI

## Sheet: PROLIFERATIVE LINEAGES
		# Red cells					# Green cells
Brain #	LINEAGE ID	VI	V	IV	II-III	Subtotal red	VI	V	IV	II-III	Subtotal green	TOTAL	Type	Layers
1	15-1033-B	3	1	2	3	9	3	2	5	4	14	23	TRANSLAMINAR	II/III to VI
1	15-1033-D	1	1	1	1	4	1	5	0	4	10	14	TRANSLAMINAR	II/III to VI
1	15-1033-E	2	1	3	2	8	3	1	5	8	17	25	TRANSLAMINAR	II/III to VI
1	15-1033-H	3	1	1	0	5	0	5	1	8	14	19	TRANSLAMINAR	II/III to VI
6	15-1034-G	1	2	1	5	9	1	2	1	2	6	15	TRANSLAMINAR	II/III to VI
6	15-1034-h	3	0	0	0	3	1	1	1	2	5	8	TRANSLAMINAR	II/III to VI
6	15-1034-K	1	1	1	1	4	0	3	0	0	3	7	TRANSLAMINAR	II/III to VI
3	45-A	2	0	2	3	7	4	0	0	0	4	11	TRANSLAMINAR	II/III-IV-VI
3	45-H	3	0	0	0	3	0	1	1	2	4	7	TRANSLAMINAR	II/III to VI
3	45-I	3	1	1	2	7	0	3	0	0	3	10	TRANSLAMINAR	II/III to VI
2	197-B	0	1	7	4	12	2	1	1	1	5	17	TRANSLAMINAR	II/III to VI
2	197-D	0	1	5	0	6	2	1	2	7	12	18	TRANSLAMINAR	II/III to VI
4	207-D	0	2	2	3	7	1	1	1	3	6	13	TRANSLAMINAR	II/III to VI
4	207-K	0	5	3	1	9	2	2	3	4	11	20	TRANSLAMINAR	II/III to VI
4	207-N	3	2	2	21	28	3	1	1	9	14	42	TRANSLAMINAR	II/III to VI
4	207-P	4	1	3	7	15	3	2	1	3	9	24	TRANSLAMINAR	II/III to VI
4	207-Q	1	2	2	5	10	2	1	3	2	8	18	TRANSLAMINAR	II/III to VI
5	352-B	0	1	1	2	4	0	1	1	3	5	9	TRANSLAMINAR	II/III-IV-V
5	352-C	3	2	1	2	8	2	3	3	6	14	22	TRANSLAMINAR	II/III to VI
7	15-1030 C	0	3	0	0	3	2	0	1	1	4	7	TRANSLAMINAR	II/III to VI
7	15-1030 D	2	0	2	3	7	4	0	2	2	8	15	TRANSLAMINAR	II/III-IV-VI
8	15-1031 A	1	0	2	2	5	1	0	6	1	8	13	TRANSLAMINAR	II/III-IV-VI
8	15-1031 D	1	1	1	1	4	2	1	3	1	7	11	TRANSLAMINAR	II/III to VI
8	15-1031 F	3	1	3	4	11	3	3	6	0	12	23	TRANSLAMINAR	II/III to VI
8	15-1031 G	1	1	4	1	7	1	1	1	0	3	10	TRANSLAMINAR	II/III to VI
9	15-1032 A	1	0	4	1	6	2	0	2	2	6	12	TRANSLAMINAR	II/III-IV-VI
9	15-1032 D	0	2	5	2	9	2	0	6	0	8	17	TRANSLAMINAR	II/III to VI
10	15-1035 A	3	0	0	0	3	2	1	3	3	9	12	TRANSLAMINAR	II/III to VI
10	15-1035 B	0	2	3	0	5	4	0	0	0	4	9	TRANSLAMINAR	IV-V-VI
11	15-1036 A	3	1	3	0	7	1	3	6	2	12	19	TRANSLAMINAR	II/III to VI
11	15-1036 D	0	1	3	4	8	1	0	3	0	4	12	TRANSLAMINAR	II/III to VI
12	15-1037 B	3	1	7	2	13	4	0	0	0	4	17	TRANSLAMINAR	II/III to VI
12	15-1037 C	0	2	2	2	6	0	2	3	5	10	16	TRANSLAMINAR	II/III-IV-V
12	15-1037 G	2	0	3	0	5	1	1	2	1	5	10	TRANSLAMINAR	II/III to VI
12	15-1037 H	3	3	4	0	10	2	4	4	3	13	23	TRANSLAMINAR	II/III to VI
13	15-1038 A	2	0	2	1	5	0	2	5	0	7	12	TRANSLAMINAR	II/III to VI
13	15-1038 D	0	0	2	4	6	0	0	3	1	4	10	SUPERFICIAL	II/III-IV
13	15-1038 F	3	0	2	0	5	3	3	0	0	6	11	TRANSLAMINAR	IV-V-VI
13	15-1038 I	3	0	2	3	8	3	0	0	0	3	11	TRANSLAMINAR	II/III-IV-VI
14	15-1039 A	4	1	2	1	8	0	2	18	1	21	29	TRANSLAMINAR	II/III to VI
17	15-1044 B	0	3	2	1	6	1	1	5	0	7	13	TRANSLAMINAR	II/III to VI
17	15-1044 C	1	0	4	1	6	3	0	0	0	3	9	TRANSLAMINAR	II/III-IV-VI
17	15-1044 D	3	0	0	0	3	3	2	2	6	13	16	TRANSLAMINAR	II/III to VI
17	15-1044 E	2	0	5	1	8	3	0	2	1	6	14	TRANSLAMINAR	II/III-IV-VI
18	15-1045 E	1	1	1	3	6	2	0	2	0	4	10	TRANSLAMINAR	II/III to VI
20	15-1047 D	0	1	9	0	10	0	2	2	1	5	15	TRANSLAMINAR	II/III-IV-V
20	15-1047 H	0	1	1	2	4	2	1	1	1	5	9	TRANSLAMINAR	II/III to VI
22	15-1050 A	0	1	1	2	4	0	1	2	2	5	9	TRANSLAMINAR	II/III-IV-V
23	15-1051 C	3	0	4	2	9	1	1	3	0	5	14	TRANSLAMINAR	II/III to VI
24	15-1052 E	3	1	2	0	6	2	0	6	7	15	21	TRANSLAMINAR	II/III to VI
26	204 A	2	0	1	2	5	0	1	4	0	5	10	TRANSLAMINAR	II/III to VI
26	204 B	4	4	6	4	18	5	1	7	2	15	33	TRANSLAMINAR	II/III to VI
26	204 E	0	2	2	0	4	1	0	2	0	3	7	TRANSLAMINAR	II/III to VI
26	204 H	1	0	2	1	4	0	1	1	2	4	8	TRANSLAMINAR	II/III to VI
27	356 A	4	3	0	1	8	4	5	2	5	16	24	TRANSLAMINAR	II/III to VI
27	356 B	2	0	2	0	4	2	0	1	3	6	10	TRANSLAMINAR	II/III-IV-VI
27	356 D	2	1	2	1	6	1	2	1	3	7	13	TRANSLAMINAR	II/III to VI
28	46 B	1	0	3	2	6	1	4	1	6	12	18	TRANSLAMINAR	II/III to VI
28	46 D	1	3	2	2	8	2	2	3	2	9	17	TRANSLAMINAR	II/III to VI
28	46 G	1	0	2	1	4	1	0	6	2	9	13	TRANSLAMINAR	II/III-IV-VI
