# Supplementary material for: A stochastic framework of neurogenesis underlies the assembly of neocortical cytoarchitecture
Source: eLife. 2019 Nov 18;8:e51381. doi: 10.7554/eLife.51381 (PMC6968929; doi:10.7554/eLife.51381)
Supplement: Figure 4—source data 1. [file elife-51381-fig4-data1.xlsx]

## Sheet: ALL LINEAGES
LINEAGE ID	HEMISPHERE	AREA	SLICES	II/III	IV	V	VI	TOT	LINEAGE TYPE	LAYERS
AL 350_1	L	Cg	21-22	7	1	2	8	18	TRANSLAMINAR	II/III to VI
AL 350_2	R	SS	24-26	4	2	0	0	6	SUPERFICIAL	II/III-IV
AL 350_3'	R	SS	30-31	8	0	0	0	8	SUPERFICIAL	II/III
AL 350_4	R	SS	31-35	4	1	1	1	7	TRANSLAMINAR	II/III to VI
AL 350_6	R	SS	43-45	6	5	0	6	17	TRANSLAMINAR	II/III-IV-VI
AL 350_7	R	SS	50-52	3	3	0	1	7	TRANSLAMINAR	II/III-IV-VI
AL 350_9	R	Au	53-55	1	1	1	1	4	TRANSLAMINAR	II/III to VI
AL 350_10	R	Vi	58	0	3	0	1	4	TRANSLAMINAR	IV-VI
AL 350_11	R	RSD	60-65	3	0	1	3	7	TRANSLAMINAR	II/III-V-VI
AL 350_12	R	Vi	64	2	4	4	3	13	TRANSLAMINAR	II/III to VI
AL364_17	L	M	14-19	4	3	2	2	11	TRANSLAMINAR	II/III to VI
AL364_18	L	SS	22	0	3	0	1	4	TRANSLAMINAR	IV-VI
AL364_19	L	Cg	26-30	2	2	0	3	7	TRANSLAMINAR	II/III-IV-VI
AL364_20	L	M	32-34	1	3	4	1	9	TRANSLAMINAR	II/III to VI
AL364_21	L	SS	35	1	0	0	7	8	TRANSLAMINAR	II/III-VI
AL364_22	L	SS	36-38	3	7	4	5	19	TRANSLAMINAR	II/III to VI
AL364_23	L	M	37-40	2	1	1	2	6	TRANSLAMINAR	II/III to VI
AL364_24	L	Vi	50-51	5	0	0	3	8	TRANSLAMINAR	II/III-VI
AL364_25	L	Vi	50-51	2	6	1	6	15	TRANSLAMINAR	II/III to VI
AL364_26	L	Vi	54-61	6	3	6	1	16	TRANSLAMINAR	II/III to VI
AL364_27	L	Au	56-60	4	0	2	3	9	TRANSLAMINAR	II/III-V-VI
AL 366_1	L	M	26-31	0	4	0	2	6	TRANSLAMINAR	IV-VI
AL 366_2	L	Cg	30-35	5	2	3	0	10	TRANSLAMINAR	II/III to V
AL 366_3	L	SS	32-35	0	3	2	4	9	TRANSLAMINAR	IV to VI
AL 366_3'	L	SS	35-38	2	2	0	1	5	TRANSLAMINAR	II/III-IV-VI
AL 366_4	L	SS	42-44	3	2	2	1	8	TRANSLAMINAR	II/III to VI
AL 366_5	L	SS	43-44	4	2	7	1	14	TRANSLAMINAR	II/III to VI
AL 366_6	L	Vi	48-50	3	3	4	5	15	TRANSLAMINAR	II/III to VI
AL 366_7	L	RSD	57-60	0	0	0	3	3	DEEP	VI
AL 366_8	L	Au	59-64	3	1	1	1	6	TRANSLAMINAR	II/III to VI
AL 366_9	L	Vi	63-67	2	6	3	2	13	TRANSLAMINAR	II/III to VI
AL 362_2	R	M	31-33	3	1	2	3	9	TRANSLAMINAR	II/III to VI
AL 362_5	R	SS	52	4	9	2	8	23	TRANSLAMINAR	II/III to VI
AL 362_6	R	Au	54-60	2	1	2	4	9	TRANSLAMINAR	II/III to VI
AL 362_7	R	Vi	62-65	5	2	2	4	13	TRANSLAMINAR	II/III to VI
AL 362_8	R	Vi	64-65	2	2	0	0	4	TRANSLAMINAR	II/III-IV
AL 362_9	L	M	21-26	4	4	2	7	17	TRANSLAMINAR	II/III to VI
AL 362_11	L	SS	30-35	8	7	3	9	27	TRANSLAMINAR	II/III to VI
AL 362_12	L	M	31-33	7	5	2	8	22	TRANSLAMINAR	II/III to VI
AL 362_13	L	M	37-40	5	2	2	1	10	TRANSLAMINAR	II/III to VI
AL 362_14	L	SS	39-41	3	1	0	2	6	TRANSLAMINAR	II/III-IV-VI
AL 362_15	L	RSD	51	1	2	0	1	4	TRANSLAMINAR	II/III-IV-VI
AL 362_16	L	Au	58-60	6	1	2	5	14	TRANSLAMINAR	II/III to VI
AL 362_17	L	VM	64-66	5	5	1	3	14	TRANSLAMINAR	II/III to VI
AL 374_1	L	SS	19	0	0	0	3	3	DEEP	VI
AL 374_2	L	SS	20-23	1	3	0	0	4	SUPERFICIAL	II/III-IV
AL 374_3	L	Cg	25-28	0	0	1	3	4	DEEP	V-VI
AL 374_4	L	SS	29-32	1	5	2	3	11	TRANSLAMINAR	II/III to VI
AL 374_6	L	M	34-38	9	1	5	2	17	TRANSLAMINAR	II/III to VI
AL 374_7	L	SS	35-37	0	2	0	2	4	TRANSLAMINAR	IV-VI
AL 374_8	L	Cg	36-38	6	0	2	1	9	TRANSLAMINAR	II/III-V-VI
AL 374_9	L	Vi	37-39	4	1	1	1	7	TRANSLAMINAR	II/III to VI
AL 374_10	L	Vi	41-44	6	3	3	1	13	TRANSLAMINAR	II/III to VI
AL 374_11	L	Au	43-46	0	0	1	2	3	DEEP	V-VI
AL 374_13	L	Vi	50-52	4	2	1	4	11	TRANSLAMINAR	II/III to VI
AL 374_14	L	Vi	51-57	12	10	5	11	38	TRANSLAMINAR	II/III to VI
AL 374_15	L	Vi	61-63	2	3	1	0	6	TRANSLAMINAR	II/III to V
AL 374_16	L	Vi	63-64	0	3	1	0	4	TRANSLAMINAR	II/III to V
AL 374_17	R	SS	19-23	6	3	1	4	14	TRANSLAMINAR	II/III to VI
AL 374_18	R	SS	19-23	1	5	2	0	8	TRANSLAMINAR	II/III to V
AL 374_19	R	M	21-23	0	3	0	2	5	TRANSLAMINAR	IV-VI
AL 374_20	R	M	30-33	4	4	7	2	17	TRANSLAMINAR	II/III to VI
AL 374_21	R	M	31-35	0	1	1	1	3	TRANSLAMINAR	IV to VI
AL 374_22	R	M/RSD	36-40	7	0	2	4	13	TRANSLAMINAR	II/III-V-VI
AL 374_23	R	RSD	40-44	23	1	8	6	38	TRANSLAMINAR	II/III to VI
AL 374_24	R	RSG	41-43	2	0	1	0	3	TRANSLAMINAR	II/III-V-VI
AL 374_25	R	M	40-43	4	1	0	2	7	TRANSLAMINAR	II/III-IV-VI
AL 374_26	R	SS	41-42	2	2	0	0	4	SUPERFICIAL	II/III-IV
AL 374_27	R	Vi	46-52	6	2	5	2	15	TRANSLAMINAR	II/III to VI
AL 374_29	R	SS	53-56	4	5	0	3	12	TRANSLAMINAR	II/III-IV-VI
AL 374_30	R	Vi	57	3	1	0	5	9	TRANSLAMINAR	II/III-IV-VI
AL 374_31	R	Vi	60-63	9	5	0	2	16	TRANSLAMINAR	II/III-IV-VI
AL 374_32	R	Au	62-67	1	1	1	1	4	TRANSLAMINAR	II/III to VI
AL 384_1	R	Cg	21-24	2	0	2	1	5	TRANSLAMINAR	II/III-V-VI
AL 384_2	R	M	27-30	7	4	0	4	15	TRANSLAMINAR	II/III-IV-VI
AL 384_3	R	M	30-32	3	2	0	3	8	TRANSLAMINAR	II/III-IV-VI
AL 384_4	L	SS	31-32	0	4	3	1	8	TRANSLAMINAR	IV to VI
AL 384_5	R	SS	32-36	0	3	3	2	8	TRANSLAMINAR	IV to VI
AL 384_6	L	SS	41-45	11	3	2	4	20	TRANSLAMINAR	II/III to VI
AL 384_7	L	SS	43-47	7	4	0	5	16	TRANSLAMINAR	II/III-IV-VI
AL 384_8	L	RSD	56-59	9	0	2	0	11	TRANSLAMINAR	II/III-V
AL 384_9	R	Vi	57-59	0	0	0	3	3	DEEP	VI
AL 384_10	L	VM	59-60	5	0	2	0	7	TRANSLAMINAR	II/III-V
AL 387_1	L	M	23-28	10	3	7	3	23	TRANSLAMINAR	II/III to VI
AL 387_2	L	Cg	29-31	3	1	0	2	6	TRANSLAMINAR	II/III-IV-VI
AL 387_3	L	Cg	32-33	2	1	3	2	8	TRANSLAMINAR	II/III to VI
AL 387_4	L	SS	38-40	4	5	5	3	17	TRANSLAMINAR	II/III to VI
AL 387_5	L	SS	41-43	3	3	0	0	6	SUPERFICIAL	II/III-IV
AL 387_6	L	SS	45-47	2	3	0	1	6	TRANSLAMINAR	II/III-IV-VI
AL 387_7	L	SS	46-47	0	3	1	0	4	TRANSLAMINAR	IV-V
AL 387_9	L	RSG	47-50	6	0	2	0	8	TRANSLAMINAR	II/III-V
AL 387_10	L	Vi	48-52	10	1	3	3	17	TRANSLAMINAR	II/III to VI
AL 387_11	L	Au	55-61	3	5	6	2	16	TRANSLAMINAR	II/III to VI
AL 387_12	L	Vi	56-57	4	2	2	1	9	TRANSLAMINAR	II/III to VI
AL 387_13	L	RSG	60-65	24	0	3	11	38	TRANSLAMINAR	II/III-V-VI
AL 387_14	L	Vi	60-61	2	1	0	4	7	TRANSLAMINAR	II/III-IV-VI
AL 387_15	L	RSD	62-64	8	5	1	0	14	TRANSLAMINAR	II/III to V
AL 387_16	L	Vi	69-71	4	4	0	0	8	SUPERFICIAL	II/III-IV
AL 403_1	R	Cg	13-17	2	0	4	1	7	TRANSLAMINAR	II/III to V
AL 403_2	R	M	14-17	4	1	1	1	7	TRANSLAMINAR	II/III to VI
AL 403_4	L	SS	16-21	1	1	3	1	6	TRANSLAMINAR	II/III to VI
AL 403_5	L	SS	18	2	1	0	0	3	SUPERFICIAL	II/III-IV
AL 403_6	L	M	18-21	4	1	1	2	8	TRANSLAMINAR	II/III to VI
AL 403_7	L	SS	19-22	1	2	6	2	11	TRANSLAMINAR	II/III to VI
AL 403_8	R	M	21-24	10	1	4	2	17	TRANSLAMINAR	II/III to VI
AL 403_9	R	Cg	23-28	7	1	17	7	32	TRANSLAMINAR	II/III to VI
AL 403_10	R	Cg	24-27	7	0	4	3	14	TRANSLAMINAR	II/III to VI
AL 403_11	L	SS	28-33	2	2	1	3	8	TRANSLAMINAR	II/III to VI
AL 403_12	L	SS	37-38	0	0	1	3	4	DEEP	V-VI
AL 403_14	R	SS	38-42	5	4	0	1	10	TRANSLAMINAR	II/III-IV-VI
AL 403_15	R	SS	40-41	2	0	2	2	6	TRANSLAMINAR	II/III-V-VI
AL 403_16	L	SS	41-42	0	4	0	4	8	TRANSLAMINAR	IV-VI
AL 403_17	L	SS	43-44	2	2	2	2	8	TRANSLAMINAR	II/III to VI
AL 403_18	L	SS	41	0	0	0	3	3	DEEP	VI
AL 403_19	R	SS	42-43	5	2	0	2	9	TRANSLAMINAR	II/III-IV-VI
AL 403_21	L	Vi	53-56	4	2	1	1	8	TRANSLAMINAR	II/III to VI
AL 403_22	R	Vi	53-54	1	3	0	0	4	SUPERFICIAL	II/III-IV
AL 403_23	L	Vi	55-58	14	4	14	7	39	TRANSLAMINAR	II/III to VI
AL 403_24	R	VM	59	2	2	3	0	7	TRANSLAMINAR	II/III to V
AL 403_25	L	Vi	63-67	9	7	0	6	22	TRANSLAMINAR	II/III-IV-VI
AL 404_1	R	M	23-28	13	6	9	4	32	TRANSLAMINAR	II/III to VI
AL 404_2	R	Cg	25-26	9	0	1	0	10	TRANSLAMINAR	II/III-V
AL 404_3	R	M	32-35	0	0	2	1	3	DEEP	V-VI
AL 405_1	R	Cg	26-29	3	2	1	1	7	TRANSLAMINAR	II/III to VI
AL 405_2	L	RSD	37-39	1	1	2	1	5	TRANSLAMINAR	II/III to VI
AL 405_3	L	VM	55-56	7	1	1	0	9	TRANSLAMINAR	II/III to V
AL 405_4	?	Vi	66-67	1	2	0	0	3	SUPERFICIAL	II/III-IV
AL 405_5	L	Au	67-69	0	0	0	3	3	DEEP	VI
AL 407_1	R	Cg	22-26	8	2	3	0	13	TRANSLAMINAR	II/III to V
AL 407_2	R	M	22-25	3	4	6	0	13	TRANSLAMINAR	II/III to V
AL 407_3	R	M	22-27	6	3	1	2	12	TRANSLAMINAR	II/III to VI
AL 407_4	R	SS	28-32	2	1	0	2	5	TRANSLAMINAR	II/III-IV-VI
AL 407_5	R	M	32-34	7	0	0	0	7	SUPERFICIAL	II/III
AL 407_6	R	M	35-39	0	0	3	4	7	DEEP	V-VI
AL 407_7	R	SS	32-37	7	3	2	2	14	TRANSLAMINAR	II/III to VI
AL 407_8	R	SS	41-45	0	4	0	5	9	TRANSLAMINAR	IV-VI
AL 407_9	R	SS	47-51	7	2	0	6	15	TRANSLAMINAR	II/III-IV-VI
AL 407_10	R	RSD	52-54	4	0	3	0	7	TRANSLAMINAR	II/III-V
AL 407_11	R	SS	56-57	3	0	1	3	7	TRANSLAMINAR	II/III-V-VI
AL 407_12	R	RSG	58-64	0	0	0	4	4	DEEP	VI
AL 407_13	R	Au	62-66	0	0	3	0	3	DEEP	V
AL 407_14	R	Vi	64-67	3	1	0	7	11	TRANSLAMINAR	II/III-IV-VI
AL 407_15	R	RSG	67-68	4	0	1	0	5	TRANSLAMINAR	II/III-V
AL 407_16	R	Au	69-72	3	2	2	3	10	TRANSLAMINAR	II/III to VI
AL 447_1	R	M	17	0	0	0	5	5	DEEP	VI
AL 447_2	R	Cg	18-23	3	1	1	3	8	TRANSLAMINAR	II/III to VI
AL 447_3	R	M	20-23	2	1	2	1	6	TRANSLAMINAR	II/III to VI
AL 447_4	R	M	24-27	4	2	5	4	15	TRANSLAMINAR	II/III to VI
AL 447_5	R	SS	25-27	3	1	0	4	8	TRANSLAMINAR	II/III-IV-VI
AL 447_6	R	SS	26-28	0	2	1	1	4	TRANSLAMINAR	IV to VI
AL 447_7	R	M	27-28	0	1	0	2	3	TRANSLAMINAR	IV-VI
AL 447_8	R	M	36-37	3	1	0	0	4	SUPERFICIAL	II/III-IV
AL 447_9	R	RSG	38-40	3	0	0	2	5	TRANSLAMINAR	II/III-V
AL 447_10	R	SS	39-40	6	2	0	0	8	SUPERFICIAL	II/III-IV
AL 447_11	R	Au	42-46	5	9	3	5	22	TRANSLAMINAR	II/III to VI
AL 447_12	R	VM	46-48	3	0	1	1	5	TRANSLAMINAR	II/III-V-VI
AL 447_13	R	Au	53-55	10	1	6	3	20	TRANSLAMINAR	II/III to VI
AL 447_14	R	RSD	52-57	11	6	6	7	30	TRANSLAMINAR	II/III to VI
AL 447_15	L	SS	21-22	0	0	0	3	3	DEEP	VI
AL 447_16	L	SS	23-25	1	3	2	3	9	TRANSLAMINAR	II/III to VI
AL 447_17	L	SS	23-27	2	3	1	0	6	TRANSLAMINAR	II/III to V
AL 447_18	L	Cg	25-29	21	7	16	17	61	TRANSLAMINAR	II/III to VI
AL 447_19	L	M	26-28	6	3	0	0	9	SUPERFICIAL	II/III-IV
AL 447_20	L	M	28-34	10	5	2	9	26	TRANSLAMINAR	II/III to VI
AL 447_21	L	SS	28-37	5	2	4	3	14	TRANSLAMINAR	II/III to VI
AL 447_22	L	SS	30-33	3	2	0	2	7	TRANSLAMINAR	II/III-IV-VI
AL 447_23	L	SS	35-39	3	3	2	3	11	TRANSLAMINAR	II/III to VI
AL 447_24	L	VM	38-39	5	1	0	0	6	SUPERFICIAL	II/III-IV
AL 447_25	L	RSD	38-41	3	1	0	1	5	TRANSLAMINAR	II/III-IV-VI
AL 447_26	L	Vi	41-43	4	1	1	2	8	TRANSLAMINAR	II/III to VI
AL 447_27	L	Au	46-50	11	3	6	6	26	TRANSLAMINAR	II/III to VI
AL 447_28	L	Vi	53-59	16	4	14	8	42	TRANSLAMINAR	II/III to VI
AL 447_29	L	Au	53-57	4	4	3	5	16	TRANSLAMINAR	II/III to VI
AL 447_30	L	RSD	53-55	4	0	0	4	8	TRANSLAMINAR	II/III-VI
AL 454_1	R	M	28-36	5	2	7	7	21	TRANSLAMINAR	II/III to VI
AL 454_2	R	Cg	30-31	2	0	4	1	7	TRANSLAMINAR	II/III-V-VI
AL 454_3	R	SS	31-33	0	3	2	2	7	TRANSLAMINAR	IV to VI
AL 454_4	R	M	32-35	4	1	7	1	13	TRANSLAMINAR	II/III to VI
AL 454_5	R	SS	33-38	12	12	2	6	32	TRANSLAMINAR	II/III to VI
AL 454_6	R	SS	41-42	0	0	0	3	3	DEEP	VI
AL 454_7	R	RSG	43-46	1	0	3	0	4	TRANSLAMINAR	II/III-V
AL 454_8	R	SS	46-49	3	5	1	3	12	TRANSLAMINAR	II/III to VI
AL 454_9	R	M	47-48	3	0	0	0	3	SUPERFICIAL	II/III
AL 454_10	R	RSD	50-53	14	2	5	2	23	TRANSLAMINAR	II/III to VI
AL 454_11	R	SS	50-52	1	7	3	2	13	TRANSLAMINAR	II/III to VI
AL 454_12	R	Vi	51-53	14	2	4	2	22	TRANSLAMINAR	II/III to VI
AL 454_13	R	Vi	53	0	4	0	0	4	SUPERFICIAL	IV
AL 454_15	R	Au	63-66	6	1	0	1	8	TRANSLAMINAR	II/III-IV-VI
AL 515_1	R	M	15-18	3	0	1	2	6	TRANSLAMINAR	II/III-V-VI
AL 515_2	R	Cg	22-24	3	1	1	0	5	TRANSLAMINAR	II/III to V
AL 515_3	R	SS	26-30	0	0	0	3	3	DEEP	VI
AL 515_4	R	SS	35-37	6	2	3	1	12	TRANSLAMINAR	II/III to VI
AL 515_5	R	Vi	39-44	14	6	3	15	38	TRANSLAMINAR	II/III to VI
AL 515_6	R	RSD	45-46	5	0	0	0	5	SUPERFICIAL	II/III
AL 515_7	L	M	22-25	3	1	1	0	5	TRANSLAMINAR	II/III to V
AL 515_8	L	Cg	23-25	1	0	2	1	4	TRANSLAMINAR	II/III-V-VI
AL 515_9	L	M	31-32	3	0	0	0	3	SUPERFICIAL	II/III
AL 515_10	L	SS	36	0	0	1	2	3	DEEP	V-VI
AL 515_11	L	Au	45	0	0	3	1	4	DEEP	V-VI
AL 534_1	R	SS	25	0	3	0	0	3	SUPERFICIAL	IV
AL 534_2	R	M	25-28	3	1	1	2	7	TRANSLAMINAR	II/III to VI
AL 534_3	R	M	26-30	4	1	3	5	13	TRANSLAMINAR	II/III to VI
AL 534_4	R	SS	29-30	0	3	1	0	4	TRANSLAMINAR	IV-V
AL 534_5	R	SS	32-36	7	5	2	10	24	TRANSLAMINAR	II/III to VI
AL 534_6	R	SS	36-37	1	3	1	2	7	TRANSLAMINAR	II/III to VI
AL 534_7	R	SS	49-54	9	2	2	4	17	TRANSLAMINAR	II/III to VI
AL 534_8	R	SS	50-51	0	1	9	4	14	TRANSLAMINAR	IV to VI
AL 534_9	R	Au	57-61	2	0	0	3	5	TRANSLAMINAR	II/III-VI
AL 534_10	R	Vi	60-62	6	3	6	7	22	TRANSLAMINAR	II/III to VI
AL 534_11	R	Vi	59-62	0	0	1	2	3	DEEP	V-VI
AL 534_12	R	Vi	61-63	3	1	0	0	4	SUPERFICIAL	II/III-IV
AL 534_13	L	SS	17-22	3	3	3	9	18	TRANSLAMINAR	II/III to VI
AL 534_14	L	Cg	20-21	3	0	2	2	7	TRANSLAMINAR	II/III-V-VI
AL 534_15	L	SS	25-27	0	2	2	1	5	TRANSLAMINAR	IV to VI
AL 534_16	L	SS	26-28	2	1	0	0	3	SUPERFICIAL	II/III-IV
AL 534_17	L	Cg	31-33	2	0	1	2	5	TRANSLAMINAR	II/III-V-VI
AL 534_18	L	M	31-34	4	1	2	2	9	TRANSLAMINAR	II/III to VI
AL 534_19	L	Cg	33-35	3	1	1	1	6	TRANSLAMINAR	II/III to VI
AL 534_20	L	SS	38-42	4	0	2	1	7	TRANSLAMINAR	II/III-V-VI
AL 534_21	L	Vi	45-46	0	2	1	2	5	TRANSLAMINAR	IV to VI
AL 534_22	L	RSD	45-48	14	1	5	2	22	TRANSLAMINAR	II/III to VI
AL 534_23	L	RSD	50-55	23	4	12	8	47	TRANSLAMINAR	II/III to VI
AL 534_24	L	Vi	55-56	0	5	1	0	6	TRANSLAMINAR	IV-V
AL 538_1	R	SS	38-43	14	16	17	11	58	TRANSLAMINAR	II/III to VI
AL 538_2	R	SS	39-41	3	3	0	2	8	TRANSLAMINAR	II/III-IV-VI
AL 538_3	R	SS	41-42	4	0	1	1	6	TRANSLAMINAR	II/III-IV-VI
AL 538_4	R	SS	46-48	7	3	1	1	12	TRANSLAMINAR	II/III to VI
AL 538_5	R	Vi	56-58	0	0	1	2	3	DEEP	V-VI
AL 538_6	L	Cg	16-18	0	0	2	6	8	DEEP	V-VI
AL 538_7	L	Cg	16-18	2	0	0	2	4	TRANSLAMINAR	II/III-VI
AL 538_8	L	Cg	24-29	12	3	16	8	39	TRANSLAMINAR	II/III to VI
AL 538_9	L	SS	35-36	0	3	2	0	5	TRANSLAMINAR	IV-V
AL 538_10	L	Vi	45-46	5	1	2	1	9	TRANSLAMINAR	II/III to VI
AL 538_11	L	Vi	49-50	0	3	1	0	4	TRANSLAMINAR	IV-V
AL 542_1	R	SS	32-33	0	4	0	0	4	SUPERFICIAL	IV
AL 542_2	R	M	37-40	2	1	5	3	11	TRANSLAMINAR	II/III to VI
AL 542_3	R	RSG	53-56	6	0	1	3	10	TRANSLAMINAR	II/III-V-VI
AL 542_4	L	M	19-20	0	0	0	3	3	DEEP	VI
AL 542_5	L	Cg	30-33	2	0	0	2	4	TRANSLAMINAR	II/III-VI
AL 542_6	L	SS	43-46	3	1	4	6	14	TRANSLAMINAR	II/III to VI
AL 542_7	L	Vi	45-49	3	1	3	3	10	TRANSLAMINAR	II/III to VI
AL 543_1	R	SS	29-31	0	3	0	1	4	TRANSLAMINAR	IV-VI
AL 543_2	R	SS	30-31	0	2	3	0	5	TRANSLAMINAR	IV-V
AL 543_3	R	SS	36-38	4	4	2	1	11	TRANSLAMINAR	II/III to VI
AL 543_4	R	SS	41-42	0	4	0	1	5	TRANSLAMINAR	IV-VI
AL 543_5	R	RSG	47-49	16	0	1	0	17	TRANSLAMINAR	II/III to VI
AL 543_6	L	SS	14-16	2	4	0	1	7	TRANSLAMINAR	II/III-IV-VI
AL 543_7	L	SS	16-20	2	2	2	7	13	TRANSLAMINAR	II/III to VI
AL 543_8	L	SS	19-26	7	5	1	2	15	TRANSLAMINAR	II/III to VI
AL 543_9	L	SS	20-24	10	2	3	0	15	TRANSLAMINAR	II/III to V
AL 543_10	L	SS	30-32	24	6	7	5	42	TRANSLAMINAR	II/III to VI
AL 543_11	L	VM	35-36	3	1	2	0	6	TRANSLAMINAR	II/III to V
AL 543_12	L	VM	50-51	6	1	2	0	9	TRANSLAMINAR	II/III to V
AL 569_1	R	M	24-25	0	0	3	0	3	DEEP	V
AL 569_2	R	Cg	29-33	2	2	2	1	7	TRANSLAMINAR	II/III to VI
AL 569_3	R	SS	33-37	1	3	0	5	9	TRANSLAMINAR	II/III-IV-VI
AL 569_4	R	SS	36-37	6	1	1	0	8	TRANSLAMINAR	II/III to V
AL 569_5	R	M	40-42	4	2	0	2	8	TRANSLAMINAR	II/III-IV-VI
AL 569_6	R	M	40-44	2	1	0	1	4	TRANSLAMINAR	II/III-IV-VI
AL 569_7	R	SS	44-46	4	3	2	1	10	TRANSLAMINAR	II/III to VI
AL 569_8	R	SS	48-49	5	1	0	3	9	TRANSLAMINAR	II/III-IV-VI
AL 569_9	R	SS	48-52	9	2	1	7	19	TRANSLAMINAR	II/III to VI
AL 569_10	R	VM	58-60	2	3	0	1	6	TRANSLAMINAR	II/III-IV-VI
AL 569_11	R	Vi	60-61	4	2	2	2	10	TRANSLAMINAR	II/III to VI
AL 569_12	L	M	19-26	23	10	18	10	61	TRANSLAMINAR	II/III to VI
AL 569_13	L	SS	22-24	0	2	1	1	4	TRANSLAMINAR	IV to VI
AL 569_14	L	Cg	23-25	4	0	1	0	5	TRANSLAMINAR	II/III-V
AL 569_15	L	SS	28-31	2	0	1	0	3	TRANSLAMINAR	II/III-V
AL 569_16	L	SS	33-36	0	4	2	3	9	TRANSLAMINAR	IV to VI
AL 569_17	L	M	31-37	7	3	1	4	15	TRANSLAMINAR	II/III to VI
AL 569_18	L	M	37-40	10	2	2	3	17	TRANSLAMINAR	II/III to VI
AL 569_19	L	SS2	33-37	2	0	3	3	8	TRANSLAMINAR	II/III-V-VI
AL 569_21	L	SS	49-51	6	1	0	0	7	SUPERFICIAL	II/III-IV
AL 569_22	L	Vi	54-57	3	2	0	2	7	TRANSLAMINAR	II/III-IV-VI
AL 569_23	L	Vi	60-62	2	2	1	1	6	TRANSLAMINAR	II/III to VI
AL 569_24	L	Vi	62	0	2	2	0	4	TRANSLAMINAR	IV-V
AL 572_1	R	SS	30-34	4	2	0	5	11	TRANSLAMINAR	II/III-IV-VI
AL 572_2	R	SS	35-37	6	2	4	1	13	TRANSLAMINAR	II/III to VI
AL 572_3	R	SS2	45-46	0	0	0	4	4	DEEP	VI
AL 572_4	R	SS	50-51	4	3	0	2	9	TRANSLAMINAR	II/III-IV-VI
AL 572_5	R	Vi	55-56	2	3	0	3	8	TRANSLAMINAR	II/III-IV-VI
AL 572_6	R	SS	56-58	3	4	1	2	10	TRANSLAMINAR	II/III to VI
AL 572_7	R	Au	62-66	4	2	2	2	10	TRANSLAMINAR	II/III to VI
AL 572_8	R	Vi	63-65	3	2	0	0	5	SUPERFICIAL	II/III-IV
AL 572_9	R	Au	65-66	0	0	0	3	3	DEEP	VI
AL 572_10	R	Au	66-72	8	4	12	2	26	TRANSLAMINAR	II/III to VI
AL 572_11	L	M	17-22	2	1	2	2	7	TRANSLAMINAR	II/III to VI
AL 572_12	L	SS	27	0	0	3	1	4	DEEP	V-VI
AL 572_13	L	Cg	29-34	4	2	9	6	21	TRANSLAMINAR	II/III to VI
AL 572_14	L	SS	32-35	2	1	3	0	6	TRANSLAMINAR	II/III to V
AL 572_15	L	SS	33-37	0	10	2	0	12	TRANSLAMINAR	IV-V
AL 572_16	L	M	35-40	2	0	7	7	16	TRANSLAMINAR	II/III-V-VI
AL 572_17	L	RSG	37-39	0	0	3	0	3	DEEP	V
AL 572_18	L	RSD	38-39	3	0	3	1	7	TRANSLAMINAR	II/III-V-VI
AL 572_19	L	SS	39-40	2	2	4	0	8	TRANSLAMINAR	II/III to V
AL 572_20	L	SS	40-42	5	1	1	1	8	TRANSLAMINAR	II/III to VI
AL 572_21	L	SS	43-46	4	2	2	3	11	TRANSLAMINAR	II/III to VI
AL 572_22	L	Vi	45-47	4	5	6	2	17	TRANSLAMINAR	II/III to VI
AL 572_23	L	VM	47-51	10	7	5	12	34	TRANSLAMINAR	II/III to VI
AL 572_24	L	Au	48-50	0	1	2	2	5	TRANSLAMINAR	IV to VI
AL 572_25	L	RSD	54-58	5	1	3	1	10	TRANSLAMINAR	II/III to VI
AL 572_26	L	Vi	55-57	2	1	6	4	13	TRANSLAMINAR	II/III to VI
AL 572_27	L	VM	60-64	8	7	4	3	22	TRANSLAMINAR	II/III to VI
AL 572_29	L	Au	64	0	0	2	1	3	DEEP	V-VI
AL 682_1	L	SS	12 to 13	0	0	0	4	4	DEEP	VI
AL 682_2	L	SS	27-31	3	2	0	2	7	TRANSLAMINAR	II/III-IV-VI
AL 682_3	L	M	31-32	4	1	1	0	6	TRANSLAMINAR	II/III to V
AL 682_4	L	SS	37-38	3	2	5	3	13	TRANSLAMINAR	II/III to VI
AL 682_5	R	Cg	12 to 17	12	0	5	2	19	TRANSLAMINAR	II/III-V-VI
AL 682_6	R	SS	16-20	5	1	1	8	15	TRANSLAMINAR	II/III to VI
AL 682_7	R	Cg	24-26	3	0	2	0	5	TRANSLAMINAR	II/III-V
AL 682_8	R	SS	25-27	5	1	0	2	8	TRANSLAMINAR	II/III-IV-VI
AL 682_9	R	SS	26-27	2	2	0	3	7	TRANSLAMINAR	II/III-IV-VI
AL 682_10	R	Cg	26-30	1	0	4	3	8	TRANSLAMINAR	II/III-V-VI
AL 682_11	R	Cg	28-31	5	0	2	1	8	TRANSLAMINAR	II/III-V-VI
AL 682_12	R	SS	29-31	3	2	2	2	9	TRANSLAMINAR	II/III to VI
AL 682_14	R	SS	38	0	0	5	0	5	DEEP	V
AL 682_15	R	Au	39-42	2	1	4	2	9	TRANSLAMINAR	II/III to VI
AL 682_16	R	SS	46-47	0	7	0	2	9	TRANSLAMINAR	IV-VI
AL 682_17	R	Vi	49-50	0	4	0	0	4	SUPERFICIAL	IV
AL 682_18	R	RSD	55-57	10	0	7	3	20	TRANSLAMINAR	II/III-V-VI
AL 682_19	R	Vi	57-62	31	8	9	17	65	TRANSLAMINAR	II/III to VI
AL 692_1	R	Cg	22-25	4	0	1	1	6	TRANSLAMINAR	II/III-V-VI
AL 692_2	R	SS	35-41	3	12	2	2	19	TRANSLAMINAR	II/III to VI
AL 692_3	R	M	37-44	14	6	1	4	25	TRANSLAMINAR	II/III to VI
AL 692_4	R	SS	42-43	3	0	3	0	6	TRANSLAMINAR	II/III-V
AL 692_5	R	SS	42-44	6	4	0	4	14	TRANSLAMINAR	II/III-IV-VI
AL 692_6	R	SS	44-45	1	1	0	1	3	TRANSLAMINAR	II/III-IV-VI
AL 692_7	R	RSD	48-50	13	0	5	7	25	TRANSLAMINAR	II/III-V-VI
AL 692_8	R	VM	48-51	2	1	0	2	5	TRANSLAMINAR	II/III-IV-VI
AL 692_9	R	SS	50-51	1	3	0	3	7	TRANSLAMINAR	II/III-IV-VI
AL 692_10	R	Vi	52-53	1	0	0	2	3	TRANSLAMINAR	II/III-VI
AL 692_11	R	SS	53-57	7	5	4	3	19	TRANSLAMINAR	II/III to VI
AL 692_12	R	Au	55-60	0	0	1	6	7	DEEP	V-VI
AL 692_13	R	Au	67-73	8	2	4	8	22	TRANSLAMINAR	II/III to VI
AL 723_1	L	SS	34-36	0	6	0	6	12	TRANSLAMINAR	IV-VI
AL 723_2	L	M	36-37	0	0	1	2	3	DEEP	V-VI
AL 723_3	L	SS	38-41	4	2	1	1	8	TRANSLAMINAR	II/III to VI
AL 723_4	L	SS	40-43	6	1	2	2	11	TRANSLAMINAR	II/III to VI
AL 723_5	L	M	40-44	3	0	1	6	10	TRANSLAMINAR	II/III-V-VI
AL 723_6	L	SS	41-44	4	2	0	0	6	SUPERFICIAL	II/II-IV
AL 723_7	L	SS	42-43	3	2	2	3	10	TRANSLAMINAR	II/III to VI
AL 723_8	L	SS	43-46	4	0	3	3	10	TRANSLAMINAR	II/III-V-VI
AL 723_9	L	RSG	46-50	1	0	2	1	4	TRANSLAMINAR	II/III-V-VI
AL 723_10	L	VM	48-52	8	2	5	5	20	TRANSLAMINAR	II/III to VI
AL 723_11	L	SS	51-54	2	3	1	4	10	TRANSLAMINAR	II/III to VI
AL 723_12	L	VM	56-61	13	6	16	6	41	TRANSLAMINAR	II/III to VI
AL 723_13	L	Vi	56-58	3	1	3	6	13	TRANSLAMINAR	II/III to VI
AL 723_14	L	Vi	60-61	2	1	3	0	6	TRANSLAMINAR	II/III to V
AL 723_15	L	Vi	60-62	2	1	0	0	3	SUPERFICIAL	II/III-IV
AL 724_1	R	SS	21-23	2	2	3	0	7	TRANSLAMINAR	II/III to V
AL 724_2	R	Cg	30-31	2	0	2	0	4	TRANSLAMINAR	II/III-V
AL 724_3	R	VM	56-57	3	0	3	1	7	TRANSLAMINAR	II/III-V
AL 724_4	R	Vi	60-62	10	8	11	3	32	TRANSLAMINAR	II/III to VI
AL 724_5	L	SS	22-23	0	0	0	4	4	DEEP	VI
AL 724_6	L	Cg	24-28	1	0	1	1	3	TRANSLAMINAR	II/III-V-VI
AL 724_7	L	M	32	0	0	1	2	3	DEEP	V-VI
AL 724_8	L	SS	45-47	3	3	2	0	8	TRANSLAMINAR	II/III to V
AL 724_9	L	Vi	49-51	2	2	0	0	4	SUPERFICIAL	II/II-IV
AL 724_10	L	VM	58-60	2	0	0	1	3	TRANSLAMINAR	II/III-VI
AL 728_1	R	SS	27-31	10	5	0	4	19	TRANSLAMINAR	II/III-IV-VI
AL 728_2	R	SS	37-38	2	1	0	2	5	TRANSLAMINAR	II/III-IV-VI
AL 728_3	R	RSD	44-46	2	0	1	0	3	TRANSLAMINAR	II/III-V
AL 728_4	L	Cg	26-28	3	0	4	2	9	TRANSLAMINAR	II/III-V-VI
AL 728_5	L	Cg	31-33	5	0	2	5	12	TRANSLAMINAR	II/III-V-VI
AL 728_6	L	M	40-42	10	2	3	9	24	TRANSLAMINAR	II/III to VI

## Sheet: NEUROGENIC LINEAGES
LINEAGE ID	HEMISPHERE	AREA	SLICES	II/III	IV	V	VI	TOT	LINEAGE TYPE	LAYERS
AL 350_2	R	SS	24-26	4	2	0	0	6	SUPERFICIAL	II/III-IV
AL 350_3'	R	SS	30-31	8	0	0	0	8	SUPERFICIAL	II/III
AL 350_4	R	SS	31-35	4	1	1	1	7	TRANSLAMINAR	II/III to VI
AL 350_7	R	SS	50-52	3	3	0	1	7	TRANSLAMINAR	II/III-IV-VI
AL 350_9	R	Au	53-55	1	1	1	1	4	TRANSLAMINAR	II/III to VI
AL 350_10	R	Vi	58	0	3	0	1	4	TRANSLAMINAR	IV-VI
AL 350_11	R	RSD	60-65	3	0	1	3	7	TRANSLAMINAR	II/III-V-VI
AL364_17	L	M	14-19	4	3	2	2	11	TRANSLAMINAR	II/III to VI
AL364_18	L	SS	22	0	3	0	1	4	TRANSLAMINAR	IV-VI
AL364_19	L	Cg	26-30	2	2	0	3	7	TRANSLAMINAR	II/III-IV-VI
AL364_20	L	M	32-34	1	3	4	1	9	TRANSLAMINAR	II/III to VI
AL364_21	L	SS	35	1	0	0	7	8	TRANSLAMINAR	II/III-VI
AL364_23	L	M	37-40	2	1	1	2	6	TRANSLAMINAR	II/III to VI
AL364_24	L	Vi	50-51	5	0	0	3	8	TRANSLAMINAR	II/III-VI
AL364_27	L	Au	56-60	4	0	2	3	9	TRANSLAMINAR	II/III-V-VI
AL 366_1	L	M	26-31	0	4	0	2	6	TRANSLAMINAR	IV-VI
AL 366_2	L	Cg	30-35	5	2	3	0	10	TRANSLAMINAR	II/III to V
AL 366_3	L	SS	32-35	0	3	2	4	9	TRANSLAMINAR	IV to VI
AL 366_3'	L	SS	35-38	2	2	0	1	5	TRANSLAMINAR	II/III-IV-VI
AL 366_4	L	SS	42-44	3	2	2	1	8	TRANSLAMINAR	II/III to VI
AL 366_7	L	RSD	57-60	0	0	0	3	3	DEEP	VI
AL 366_8	L	Au	59-64	3	1	1	1	6	TRANSLAMINAR	II/III to VI
AL 362_2	R	M	31-33	3	1	2	3	9	TRANSLAMINAR	II/III to VI
AL 362_6	R	Au	54-60	2	1	2	4	9	TRANSLAMINAR	II/III to VI
AL 362_8	R	Vi	64-65	2	2	0	0	4	SUPERFICIAL	II/III-IV
AL 362_13	L	M	37-40	5	2	2	1	10	TRANSLAMINAR	II/III to VI
AL 362_14	L	SS	39-41	3	1	0	2	6	TRANSLAMINAR	II/III-IV-VI
AL 362_15	L	RSD	51	1	2	0	1	4	TRANSLAMINAR	II/III-IV-VI
AL 374_1	L	SS	19	0	0	0	3	3	DEEP	VI
AL 374_2	L	SS	20-23	1	3	0	0	4	SUPERFICIAL	II/III-IV
AL 374_3	L	Cg	25-28	0	0	1	3	4	DEEP	V-VI
AL 374_4	L	SS	29-32	1	5	2	3	11	TRANSLAMINAR	II/III to VI
AL 374_7	L	SS	35-37	0	2	0	2	4	TRANSLAMINAR	IV-VI
AL 374_8	L	Cg	36-38	6	0	2	1	9	TRANSLAMINAR	II/III-V-VI
AL 374_9	L	Vi	37-39	4	1	1	1	7	TRANSLAMINAR	II/III to VI
AL 374_11	L	Au	43-46	0	0	1	2	3	DEEP	V-VI
AL 374_13	L	Vi	50-52	4	2	1	4	11	TRANSLAMINAR	II/III to VI
AL 374_15	L	Vi	61-63	2	3	1	0	6	TRANSLAMINAR	II/III to V
AL 374_16	L	Vi	63-64	0	3	1	0	4	TRANSLAMINAR	II/III to V
AL 374_18	R	SS	19-23	1	5	2	0	8	TRANSLAMINAR	II/III to V
AL 374_19	R	M	21-23	0	3	0	2	5	TRANSLAMINAR	IV-VI
AL 374_21	R	M	31-35	0	1	1	1	3	TRANSLAMINAR	IV to VI
AL 374_24	R	RSG	41-43	2	0	1	0	3	TRANSLAMINAR	II/III-V-VI
AL 374_25	R	M	40-43	4	1	0	2	7	TRANSLAMINAR	II/III-IV-VI
AL 374_26	R	SS	41-42	2	2	0	0	4	SUPERFICIAL	II/III-IV
AL 374_29	R	SS	53-56	4	5	0	3	12	TRANSLAMINAR	II/III-IV-VI
AL 374_30	R	Vi	57	3	1	0	5	9	TRANSLAMINAR	II/III-IV-VI
AL 374_32	R	Au	62-67	1	1	1	1	4	TRANSLAMINAR	II/III to VI
AL 384_1	R	Cg	21-24	2	0	2	1	5	TRANSLAMINAR	II/III-V-VI
AL 384_3	R	M	30-32	3	2	0	3	8	TRANSLAMINAR	II/III-IV-VI
AL 384_4	L	SS	31-32	0	4	3	1	8	TRANSLAMINAR	IV to VI
AL 384_5	R	SS	32-36	0	3	3	2	8	TRANSLAMINAR	IV to VI
AL 384_8	L	RSD	56-59	9	0	2	0	11	TRANSLAMINAR	II/III-V
AL 384_9	R	Vi	57-59	0	0	0	3	3	DEEP	VI
AL 384_10	L	VM	59-60	5	0	2	0	7	TRANSLAMINAR	II/III-V
AL 387_2	L	Cg	29-31	3	1	0	2	6	TRANSLAMINAR	II/III-IV-VI
AL 387_3	L	Cg	32-33	2	1	3	2	8	TRANSLAMINAR	II/III to VI
AL 387_5	L	SS	41-43	3	3	0	0	6	SUPERFICIAL	II/III-IV
AL 387_6	L	SS	45-47	2	3	0	1	6	TRANSLAMINAR	II/III-IV-VI
AL 387_7	L	SS	46-47	0	3	1	0	4	TRANSLAMINAR	IV-V
AL 387_9	L	RSG	47-50	6	0	2	0	8	TRANSLAMINAR	II/III-V
AL 387_12	L	Vi	56-57	4	2	2	1	9	TRANSLAMINAR	II/III to VI
AL 387_14	L	Vi	60-61	2	1	0	4	7	TRANSLAMINAR	II/III-IV-VI
AL 387_16	L	Vi	69-71	4	4	0	0	8	SUPERFICIAL	II/III-IV
AL 403_1	R	Cg	13-17	2	0	4	1	7	TRANSLAMINAR	II/III-V-VI
AL 403_2	R	M	14-17	4	1	1	1	7	TRANSLAMINAR	II/III to VI
AL 403_4	L	SS	16-21	1	1	3	1	6	TRANSLAMINAR	II/III to VI
AL 403_5	L	SS	18	2	1	0	0	3	SUPERFICIAL	II/III-IV
AL 403_6	L	M	18-21	4	1	1	2	8	TRANSLAMINAR	II/III to VI
AL 403_7	L	SS	19-22	1	2	6	2	11	TRANSLAMINAR	II/III to VI
AL 403_11	L	SS	28-33	2	2	1	3	8	TRANSLAMINAR	II/III to VI
AL 403_12	L	SS	37-38	0	0	1	3	4	DEEP	V-VI
AL 403_14	R	SS	38-42	5	4	0	1	10	TRANSLAMINAR	II/III-IV-VI
AL 403_15	R	SS	40-41	2	0	2	2	6	TRANSLAMINAR	II/III-V-VI
AL 403_16	L	SS	41-42	0	4	0	4	8	TRANSLAMINAR	IV-VI
AL 403_17	L	SS	43-44	2	2	2	2	8	TRANSLAMINAR	II/III to VI
AL 403_18	L	SS	41	0	0	0	3	3	DEEP	VI
AL 403_19	R	SS	42-43	5	2	0	2	9	TRANSLAMINAR	II/III-IV-VI
AL 403_21	L	Vi	53-56	4	2	1	1	8	TRANSLAMINAR	II/III to VI
AL 403_22	R	Vi	53-54	1	3	0	0	4	SUPERFICIAL	II/III-IV
AL 403_24	R	VM	59	2	2	3	0	7	TRANSLAMINAR	II/III to V
AL 404_2	R	Cg	25-26	9	0	1	0	10	TRANSLAMINAR	II/III-V
AL 404_3	R	M	32-35	0	0	2	1	3	DEEP	V-VI
AL 405_1	R	Cg	26-29	3	2	1	1	7	TRANSLAMINAR	II/III to VI
AL 405_2	L	RSD	37-39	1	1	2	1	5	TRANSLAMINAR	II/III to VI
AL 405_3	L	VM	55-56	7	1	1	0	9	TRANSLAMINAR	II/III to V
AL 405_4	?	Vi	66-67	1	2	0	0	3	SUPERFICIAL	II/III-IV
AL 405_5	L	Au	67-69	0	0	0	3	3	DEEP	VI
AL 407_3	R	M	22-27	6	3	1	2	12	TRANSLAMINAR	II/III to VI
AL 407_4	R	SS	28-32	2	1	0	2	5	TRANSLAMINAR	II/III-IV-VI
AL 407_5	R	M	32-34	7	0	0	0	7	SUPERFICIAL	II/III
AL 407_6	R	M	35-39	0	0	2	5	7	DEEP	V-VI
AL 407_8	R	SS	41-45	0	4	0	5	9	TRANSLAMINAR	IV-VI
AL 407_10	R	RSD	52-54	4	0	3	0	7	TRANSLAMINAR	II/III-V
AL 407_11	R	SS	56-57	3	0	1	3	7	TRANSLAMINAR	II/III-V-VI
AL 407_12	R	RSG	58-64	0	0	0	4	4	DEEP	VI
AL 407_13	R	Au	62-66	0	0	3	0	3	DEEP	V
AL 407_14	R	Vi	64-67	3	1	0	7	11	TRANSLAMINAR	II/III-IV-VI
AL 407_15	R	RSG	67-68	4	0	1	0	5	TRANSLAMINAR	II/III-V
AL 407_16	R	Au	69-72	3	2	2	3	10	TRANSLAMINAR	II/III to VI
AL 447_1	R	M	17	0	0	0	5	5	DEEP	VI
AL 447_2	R	Cg	18-23	3	1	1	3	8	TRANSLAMINAR	II/III to VI
AL 447_3	R	M	20-23	2	1	2	1	6	TRANSLAMINAR	II/III to VI
AL 447_5	R	SS	25-27	3	1	0	4	8	TRANSLAMINAR	II/III-IV-VI
AL 447_6	R	SS	26-28	0	2	1	1	4	TRANSLAMINAR	IV to VI
AL 447_7	R	M	27-28	0	1	0	2	3	TRANSLAMINAR	IV-VI
AL 447_8	R	M	36-37	3	1	0	0	4	SUPERFICIAL	II/III-IV
AL 447_9	R	RSG	38-40	3	0	0	2	5	TRANSLAMINAR	II/III-VI
AL 447_10	R	SS	39-40	6	2	0	0	8	SUPERFICIAL	II/III-IV
AL 447_12	R	VM	46-48	3	0	1	1	5	TRANSLAMINAR	II/III-V-VI
AL 447_15	L	SS	21-22	0	0	0	3	3	DEEP	VI
AL 447_16	L	SS	23-25	1	3	2	3	9	TRANSLAMINAR	II/III to VI
AL 447_17	L	SS	23-27	2	3	1	0	6	TRANSLAMINAR	II/III to V
AL 447_19	L	M	26-28	6	3	0	0	9	SUPERFICIAL	II/III-IV
AL 447_22	L	SS	30-33	3	2	0	2	7	TRANSLAMINAR	II/III-IV-VI
AL 447_23	L	SS	35-39	3	3	2	3	11	TRANSLAMINAR	II/III to VI
AL 447_24	L	VM	38-39	5	1	0	0	6	SUPERFICIAL	II/III-IV
AL 447_25	L	RSD	38-41	3	1	0	1	5	TRANSLAMINAR	II/III-IV-VI
AL 447_26	L	Vi	41-43	4	1	1	2	8	TRANSLAMINAR	II/III to VI
AL 447_30	L	RSD	53-55	4	0	0	4	8	TRANSLAMINAR	II/III-VI
AL 454_2	R	Cg	30-31	2	0	4	1	7	TRANSLAMINAR	II/III-V-VI
AL 454_3	R	SS	31-33	0	3	2	2	7	TRANSLAMINAR	IV to VI
AL 454_6	R	SS	41-42	0	0	0	3	3	DEEP	VI
AL 454_7	R	RSG	43-46	1	0	3	0	4	TRANSLAMINAR	II/III-V
AL 454_8	R	SS	46-49	3	5	1	3	12	TRANSLAMINAR	II/III to VI
AL 454_9	R	M	47-48	3	0	0	0	3	SUPERFICIAL	II/III
AL 454_13	R	Vi	53	0	4	0	0	4	SUPERFICIAL	IV
AL 454_15	R	Au	63-66	6	1	0	1	8	TRANSLAMINAR	II/III-IV-VI
AL 515_1	R	M	15-18	3	0	1	2	6	TRANSLAMINAR	II/III-V-VI
AL 515_2	R	Cg	22-24	3	1	1	0	5	TRANSLAMINAR	II/III to V
AL 515_3	R	SS	26-30	0	0	0	3	3	DEEP	VI
AL 515_4	R	SS	35-37	6	2	3	1	12	TRANSLAMINAR	II/III to VI
AL 515_6	R	RSD	45-46	5	0	0	0	5	SUPERFICIAL	II/III
AL 515_7	L	M	22-25	3	1	1	0	5	TRANSLAMINAR	II/III to V
AL 515_8	L	Cg	23-25	1	0	2	1	4	TRANSLAMINAR	II/III-V-VI
AL 515_9	L	M	31-32	3	0	0	0	3	SUPERFICIAL	II/III
AL 515_10	L	SS	36	0	0	1	2	3	DEEP	V-VI
AL 515_11	L	Au	45	0	0	3	1	4	DEEP	V-VI
AL 534_1	R	SS	25	0	3	0	0	3	SUPERFICIAL	IV
AL 534_2	R	M	25-28	3	1	1	2	7	TRANSLAMINAR	II/III to VI
AL 534_4	R	SS	29-30	0	3	1	0	4	TRANSLAMINAR	IV-V
AL 534_6	R	SS	36-37	1	3	1	2	7	TRANSLAMINAR	II/III to VI
AL 534_9	R	Au	57-61	2	0	0	3	5	TRANSLAMINAR	II/III-VI
AL 534_11	R	Vi	59-62	0	0	1	2	3	DEEP	V-VI
AL 534_12	R	Vi	61-63	3	1	0	0	4	SUPERFICIAL	II/III-IV
AL 534_14	L	Cg	20-21	3	0	2	2	7	TRANSLAMINAR	II/III-V-VI
AL 534_15	L	SS	25-27	0	2	2	1	5	TRANSLAMINAR	IV to VI
AL 534_16	L	SS	26-28	2	1	0	0	3	SUPERFICIAL	II/III-IV
AL 534_17	L	Cg	31-33	2	0	1	2	5	TRANSLAMINAR	II/III-V-VI
AL 534_18	L	M	31-34	4	1	2	2	9	TRANSLAMINAR	II/III to VI
AL 534_19	L	Cg	33-35	3	1	1	1	6	TRANSLAMINAR	II/III to VI
AL 534_20	L	SS	38-42	4	0	2	1	7	TRANSLAMINAR	II/III-V-VI
AL 534_21	L	Vi	45-46	0	2	1	2	5	TRANSLAMINAR	IV to VI
AL 534_24	L	Vi	55-56	0	5	1	0	6	TRANSLAMINAR	IV-V
AL 538_2	R	SS	39-41	3	3	0	2	8	TRANSLAMINAR	II/III-IV-VI
AL 538_3	R	SS	41-42	4	0	1	1	6	TRANSLAMINAR	II/III-IV-VI
AL 538_4	R	SS	46-48	7	3	1	1	12	TRANSLAMINAR	II/III to VI
AL 538_5	R	Vi	56-58	0	0	1	2	3	DEEP	V-VI
AL 538_6	L	Cg	16-18	0	0	2	6	8	DEEP	V-VI
AL 538_7	L	Cg	16-18	2	0	0	2	4	TRANSLAMINAR	II/III-VI
AL 538_9	L	SS	35-36	0	3	2	0	5	TRANSLAMINAR	IV-V
AL 538_10	L	Vi	45-46	5	1	2	1	9	TRANSLAMINAR	II/III to VI
AL 538_11	L	Vi	49-50	0	3	1	0	4	TRANSLAMINAR	IV-V
AL 542_1	R	SS	32-33	0	4	0	0	4	SUPERFICIAL	IV
AL 542_2	R	M	37-40	2	1	5	3	11	TRANSLAMINAR	II/III to VI
AL 542_3	R	RSG	53-56	6	0	1	3	10	TRANSLAMINAR	II/III-V-VI
AL 542_4	L	M	19-20	0	0	0	3	3	DEEP	VI
AL 542_5	L	Cg	30-33	2	0	0	2	4	TRANSLAMINAR	II/III-VI
AL 542_7	L	Vi	45-49	3	1	3	3	10	TRANSLAMINAR	II/III to VI
AL 543_1	R	SS	29-31	0	3	0	1	4	TRANSLAMINAR	IV-VI
AL 543_2	R	SS	30-31	0	2	3	0	5	TRANSLAMINAR	IV-V
AL 543_3	R	SS	36-38	4	4	2	1	11	TRANSLAMINAR	II/III to VI
AL 543_4	R	SS	41-42	0	4	0	1	5	TRANSLAMINAR	IV-VI
AL 543_11	L	VM	35-36	3	1	2	0	6	TRANSLAMINAR	II/III to V
AL 543_11	L	VM	35-36	3	1	1	0	5	TRANSLAMINAR	II/III to V
AL 543_12	L	VM	50-51	6	1	2	0	9	TRANSLAMINAR	II/III to V
AL 569_1	R	M	24-25	0	0	3	0	3	DEEP	V
AL 569_2	R	Cg	29-33	2	2	2	1	7	TRANSLAMINAR	II/III to VI
AL 569_3	R	SS	33-37	2	3	0	5	10	TRANSLAMINAR	II/III-IV-VI
AL 569_4	R	SS	36-37	6	1	1	0	8	TRANSLAMINAR	II/III to V
AL 569_5	R	M	40-42	4	2	0	2	8	TRANSLAMINAR	II/III-IV-VI
AL 569_6	R	M	40-44	2	1	0	1	4	TRANSLAMINAR	II/III-IV-VI
AL 569_7	R	SS	44-46	4	3	2	1	10	TRANSLAMINAR	II/III to VI
AL 569_8	R	SS	48-49	5	1	0	3	9	TRANSLAMINAR	II/III-IV-VI
AL 569_10	R	VM	58-60	2	3	0	1	6	TRANSLAMINAR	II/III-IV-VI
AL 569_11	R	Vi	60-61	4	2	2	2	10	TRANSLAMINAR	II/III to VI
AL 569_13	L	SS	22-24	0	2	1	1	4	TRANSLAMINAR	IV to VI
AL 569_14	L	Cg	23-25	4	0	1	0	5	TRANSLAMINAR	II/III-V
AL 569_15	L	SS	27-30	3	0	1	0	4	TRANSLAMINAR	II/III-V
AL 569_16	L	SS	33-36	0	4	2	3	9	TRANSLAMINAR	IV to VI
AL 569_19	L	SS2	33-37	2	0	3	3	8	TRANSLAMINAR	II/III-V-VI
AL 569_21	L	SS	49-51	6	1	0	0	7	SUPERFICIAL	II/III-IV
AL 569_22	L	Vi	54-57	3	2	0	2	7	TRANSLAMINAR	II/III-IV-VI
AL 569_23	L	Vi	60-62	2	2	1	1	6	TRANSLAMINAR	II/III to VI
AL 569_24	L	Vi	62	0	2	2	0	4	TRANSLAMINAR	IV-V
AL 572_1	R	SS	30-34	4	2	0	5	11	TRANSLAMINAR	II/III-IV-VI
AL 572_3	R	SS2	45-46	0	0	0	4	4	DEEP	VI
AL 572_4	R	SS	50-51	4	3	0	2	9	TRANSLAMINAR	II/III-IV-VI
AL 572_5	R	Vi	55-56	2	3	0	3	8	TRANSLAMINAR	II/III-IV-VI
AL 572_6	R	SS	56-58	3	4	1	2	10	TRANSLAMINAR	II/III to VI
AL 572_7	R	Au	62-66	4	2	2	2	10	TRANSLAMINAR	II/III to VI
AL 572_8	R	Vi	63-65	4	2	0	0	6	SUPERFICIAL	II/III-IV
AL 572_9	R	Au	66-67	0	0	0	3	3	DEEP	VI
AL 572_11	L	M	17-22	1	2	2	1	6	TRANSLAMINAR	II/III to VI
AL 572_12	L	SS	27	0	0	3	1	4	DEEP	V-VI
AL 572_14	L	SS	32-35	2	1	3	0	6	TRANSLAMINAR	II/III to V
AL 572_15	L	SS	33-37	0	10	2	0	12	TRANSLAMINAR	IV-V
AL 572_17	L	RSG	37-39	0	0	3	0	3	DEEP	V
AL 572_18	L	RSD	38-39	3	0	3	1	7	TRANSLAMINAR	II/III-V-VI
AL 572_19	L	SS	39-40	2	2	4	0	8	TRANSLAMINAR	II/III to V
AL 572_20	L	SS	40-42	5	1	1	1	8	TRANSLAMINAR	II/III to VI
AL 572_21	L	SS	43-46	4	2	2	3	11	TRANSLAMINAR	II/III to VI
AL 572_24	L	Au	48-50	0	0	3	2	5	DEEP	V-VI
AL 572_25	L	RSD	54-58	5	1	3	1	10	TRANSLAMINAR	II/III to VI
AL 572_29	L	Au	64	0	0	2	1	3	DEEP	V-VI
AL 682_1	L	SS	12 to 13	0	0	0	4	4	DEEP	VI
AL 682_2	L	SS	27-31	3	2	0	2	7	TRANSLAMINAR	II/III-IV-VI
AL 682_3	L	M	31-32	4	1	1	0	6	TRANSLAMINAR	II/III to V
AL 682_7	R	Cg	24-26	3	0	2	0	5	TRANSLAMINAR	II/III-V
AL 682_8	R	SS	25-27	5	1	0	2	8	TRANSLAMINAR	II/III-IV-VI
AL 682_9	R	SS	26-27	2	2	0	3	7	TRANSLAMINAR	II/III-IV-VI
AL 682_10	R	Cg	26-30	1	0	4	3	8	TRANSLAMINAR	II/III-V-VI
AL 682_11	R	Cg	28-31	5	0	2	1	8	TRANSLAMINAR	II/III-V-VI
AL 682_12	R	SS	29-31	3	2	2	2	9	TRANSLAMINAR	II/III to VI
AL 682_14	R	SS	38	0	0	5	0	5	DEEP	V
AL 682_15	R	Au	39-42	2	1	4	2	9	TRANSLAMINAR	II/III to VI
AL 682_16	R	SS	46-47	0	7	0	2	9	TRANSLAMINAR	IV-VI
AL 682_17	R	Vi	49-50	0	4	0	0	4	SUPERFICIAL	IV
AL 692_1	R	Cg	22-25	4	0	1	1	6	TRANSLAMINAR	II/III-V-VI
AL 692_4	R	SS	42-43	3	0	3	0	6	TRANSLAMINAR	II/III-V
AL 692_6	R	SS	44-45	1	1	0	1	3	TRANSLAMINAR	II/III-IV-VI
AL 692_8	R	VM	48-51	2	1	0	2	5	TRANSLAMINAR	II/III-IV-VI
AL 692_9	R	SS	50-51	1	3	0	3	7	TRANSLAMINAR	II/III-IV-VI
AL 692_10	R	Vi	52-53	1	0	0	2	3	TRANSLAMINAR	II/III-VI
AL 692_12	R	Au	55-60	0	0	1	6	7	DEEP	V-VI
AL 723_1	L	SS	34-36	0	6	0	6	12	TRANSLAMINAR	IV-VI
AL 723_2	L	M	36-37	0	0	1	2	3	DEEP	V-VI
AL 723_3	L	SS	38-41	4	2	1	1	8	TRANSLAMINAR	II/III to VI
AL 723_4	L	SS	40-43	6	1	2	2	12	TRANSLAMINAR	II/III to VI
AL 723_5	L	M	40-44	3	0	1	6	10	TRANSLAMINAR	II/III-V-VI
AL 723_6	L	SS	41-44	4	2	0	0	6	SUPERFICIAL	II/III-IV
AL 723_7	L	SS	42-43	3	2	2	3	10	TRANSLAMINAR	II/III to VI
AL 723_8	L	SS	43-46	4	0	3	3	10	TRANSLAMINAR	II/III-V-VI
AL 723_9	L	RSG	46-50	1	0	2	1	4	TRANSLAMINAR	II/III-V-VI
AL 723_11	L	SS	51-54	2	3	1	4	10	TRANSLAMINAR	II/III to VI
AL 723_14	L	Vi	60-61	2	1	3	0	6	TRANSLAMINAR	II/III to V
AL 723_15	L	Vi	60-62	2	1	0	0	3	SUPERFICIAL	II/III-IV
AL 724_1	R	SS	21-23	2	2	3	0	7	TRANSLAMINAR	II/III to V
AL 724_2	R	Cg	30-31	2	0	2	0	4	TRANSLAMINAR	II/III-V
AL 724_3	R	VM	56-57	3	0	3	1	7	TRANSLAMINAR	II/III-V
AL 724_5	L	SS	22-23	0	0	0	4	4	DEEP	VI
AL 724_6	L	Cg	24-28	1	0	1	1	3	TRANSLAMINAR	II/III-V-VI
AL 724_7	L	M	32	0	0	1	2	3	DEEP	V-VI
AL 724_8	L	SS	45-47	3	3	2	0	8	TRANSLAMINAR	II/III to V
AL 724_9	L	Vi	49-51	2	2	0	0	4	SUPERFICIAL	II/III-IV
AL 724_10	L	VM	58-60	2	0	0	1	3	TRANSLAMINAR	II/III-VI
AL 728_2	R	SS	37-38	2	1	0	2	5	TRANSLAMINAR	II/III-IV-VI
AL 728_3	R	RSD	44-46	2	0	1	0	3	TRANSLAMINAR	II/III-V
AL 728_4	L	Cg	26-28	3	0	4	2	9	TRANSLAMINAR	II/III-V-VI
AL 728_5	L	Cg	31-33	5	0	2	5	12	TRANSLAMINAR	II/III-V-VI

## Sheet: PROLIFERATIVE LINEAGES
LINEAGE ID	HEMISPHERE	AREA	SLICES	II/III	IV	V	VI	TOT	LINEAGE TYPE	LAYERS
AL 350_1	L	Cg	21-22	7	1	2	8	18	TRANSLAMINAR	II/III to VI
AL 350_6	R	SS	43-45	6	5	0	6	17	TRANSLAMINAR	II/III-IV-VI
AL 350_12	R	Vi	64	2	4	4	3	13	TRANSLAMINAR	II/III to VI
AL364_22	L	SS	36-38	3	7	4	5	19	TRANSLAMINAR	II/III to VI
AL364_25	L	Vi	50-51	2	6	1	6	15	TRANSLAMINAR	II/III to VI
AL364_26	L	Vi	54-61	6	3	6	1	16	TRANSLAMINAR	II/III to VI
AL 366_5	L	SS	43-44	4	2	7	1	14	TRANSLAMINAR	II/III to VI
AL 366_6	L	Vi	48-50	3	3	4	5	15	TRANSLAMINAR	II/III to VI
AL 366_9	L	Vi	63-67	2	6	3	2	13	TRANSLAMINAR	II/III to VI
AL 362_5	R	SS	52	4	9	2	8	23	TRANSLAMINAR	II/III to VI
AL 362_7	R	Vi	62-65	5	2	2	4	13	TRANSLAMINAR	II/III to VI
AL 362_9	L	M	21-26	4	4	2	7	17	TRANSLAMINAR	II/III to VI
AL 362_11	L	SS	30-35	8	7	3	9	27	TRANSLAMINAR	II/III to VI
AL 362_12	L	M	31-33	7	5	2	8	22	TRANSLAMINAR	II/III to VI
AL 362_16	L	Au	58-60	6	1	2	5	14	TRANSLAMINAR	II/III to VI
AL 362_17	L	VM	64-66	5	5	1	3	14	TRANSLAMINAR	II/III to VI
AL 374_6	L	M	34-38	9	1	5	2	17	TRANSLAMINAR	II/III to VI
AL 374_10	L	Vi	41-44	6	3	3	1	13	TRANSLAMINAR	II/III to VI
AL 374_14	L	Vi	51-57	12	10	5	11	38	TRANSLAMINAR	II/III to VI
AL 374_17	R	SS	19-23	6	3	1	4	14	TRANSLAMINAR	II/III to VI
AL 374_20	R	M	30-33	4	4	7	2	17	TRANSLAMINAR	II/III to VI
AL 374_22	R	M/RSD	36-40	7	0	2	4	13	TRANSLAMINAR	II/III-V-VI
AL 374_23	R	RSD	40-44	23	1	8	6	38	TRANSLAMINAR	II/III to VI
AL 374_27	R	Vi	46-52	6	2	5	2	15	TRANSLAMINAR	II/III to VI
AL 374_31	R	Vi	60-63	9	5	0	2	16	TRANSLAMINAR	II/III-IV-VI
AL 384_2	R	M	27-30	7	4	0	4	15	TRANSLAMINAR	II/III-IV-VI
AL 384_6	L	SS	41-45	11	3	2	4	20	TRANSLAMINAR	II/III to VI
AL 384_7	L	SS	43-47	7	4	0	5	16	TRANSLAMINAR	II/III-IV-VI
AL 387_1	L	M	23-28	10	3	7	3	23	TRANSLAMINAR	II/III to VI
AL 387_4	L	SS	38-40	4	5	5	3	17	TRANSLAMINAR	II/III to VI
AL 387_10	L	Vi	48-52	10	1	3	3	17	TRANSLAMINAR	II/III to VI
AL 387_11	L	Au	55-61	3	5	6	2	16	TRANSLAMINAR	II/III to VI
AL 387_13	L	RSG	60-65	24	0	3	11	38	TRANSLAMINAR	II/III-V-VI
AL 387_15	L	RSD	62-64	8	5	1	0	14	TRANSLAMINAR	II/III to V
AL 403_8	R	M	21-24	10	1	4	2	17	TRANSLAMINAR	II/III to VI
AL 403_9	R	Cg	23-28	7	1	17	7	32	TRANSLAMINAR	II/III to VI
AL 403_10	R	Cg	24-27	7	0	4	3	14	TRANSLAMINAR	II/III to VI
AL 403_23	L	Vi	55-58	14	4	14	7	39	TRANSLAMINAR	II/III to VI
AL 403_25	L	Vi	63-67	9	7	0	6	22	TRANSLAMINAR	II/III-IV-VI
AL 404_1	R	M	23-28	13	6	9	4	32	TRANSLAMINAR	II/III to VI
AL 407_1	R	Cg	22-26	8	2	3	0	13	TRANSLAMINAR	II/III to V
AL 407_2	R	M	22-25	3	4	6	0	13	TRANSLAMINAR	II/III to V
AL 407_7	R	SS	32-37	7	3	2	2	14	TRANSLAMINAR	II/III to VI
AL 407_9	R	SS	47-51	7	2	0	6	15	TRANSLAMINAR	II/III-IV-VI
AL 447_4	R	M	24-27	4	2	5	4	15	TRANSLAMINAR	II/III to VI
AL 447_11	R	Au	42-46	5	9	3	5	22	TRANSLAMINAR	II/III to VI
AL 447_13	R	Au	53-55	10	1	6	3	20	TRANSLAMINAR	II/III to VI
AL 447_14	R	RSD	52-57	11	6	6	7	30	TRANSLAMINAR	II/III to VI
AL 447_18	L	Cg	25-29	21	7	16	17	61	TRANSLAMINAR	II/III to VI
AL 447_20	L	M	28-34	10	5	2	9	26	TRANSLAMINAR	II/III to VI
AL 447_21	L	SS	28-37	5	2	4	3	14	TRANSLAMINAR	II/III to VI
AL 447_27	L	Au	46-50	11	3	6	6	26	TRANSLAMINAR	II/III to VI
AL 447_28	L	Vi	53-59	16	4	14	8	42	TRANSLAMINAR	II/III to VI
AL 447_29	L	Au	53-57	4	4	3	5	16	TRANSLAMINAR	II/III to VI
AL 454_1	R	M	28-36	5	2	7	7	21	TRANSLAMINAR	II/III to VI
AL 454_4	R	M	32-35	4	1	7	1	13	TRANSLAMINAR	II/III to VI
AL 454_5	R	SS	33-38	12	12	2	6	32	TRANSLAMINAR	II/III to VI
AL 454_10	R	RSD	50-53	14	2	5	2	23	TRANSLAMINAR	II/III to VI
AL 454_11	R	SS	50-52	1	7	3	2	13	TRANSLAMINAR	II/III to VI
AL 454_12	R	Vi	51-53	14	2	4	2	22	TRANSLAMINAR	II/III to VI
AL 515_5	R	Vi	39-44	14	6	3	15	38	TRANSLAMINAR	II/III to VI
AL 534_3	R	M	26-30	4	1	3	5	13	TRANSLAMINAR	II/III to VI
AL 534_5	R	SS	32-36	7	5	2	10	24	TRANSLAMINAR	II/III to VI
AL 534_7	R	SS	49-54	9	2	2	4	17	TRANSLAMINAR	II/III to VI
AL 534_8	R	SS	50-51	0	1	9	4	14	TRANSLAMINAR	IV to VI
AL 534_10	R	Vi	60-62	6	3	6	7	22	TRANSLAMINAR	II/III to VI
AL 534_13	L	SS	17-22	3	3	3	9	18	TRANSLAMINAR	II/III to VI
AL 534_22	L	RSD	45-48	14	1	5	2	22	TRANSLAMINAR	II/III to VI
AL 534_23	L	RSD	50-55	23	4	12	8	47	TRANSLAMINAR	II/III to VI
AL 538_1	R	SS	38-43	14	16	17	11	58	TRANSLAMINAR	II/III to VI
AL 538_8	L	Cg	24-29	12	3	16	8	39	TRANSLAMINAR	II/III to VI
AL 542_6	L	SS	43-46	3	1	4	6	14	TRANSLAMINAR	II/III to VI
AL 543_5	R	RSG	47-49	16	0	1	0	17	TRANSLAMINAR	II/III to VI
AL 543_7	L	SS	16-20	2	2	2	7	13	TRANSLAMINAR	II/III to VI
AL 543_8	L	SS	19-26	7	5	1	2	15	TRANSLAMINAR	II/III to VI
AL 543_9	L	SS	20-24	10	2	3	0	15	TRANSLAMINAR	II/III to V
AL 543_10	L	SS	30-32	24	6	7	5	42	TRANSLAMINAR	II/III to VI
AL 569_9	R	SS	48-52	9	2	1	7	19	TRANSLAMINAR	II/III to VI
AL 569_12	L	M	19-26	23	10	18	10	61	TRANSLAMINAR	II/III to VI
AL 569_17	L	M	31-37	7	3	1	4	15	TRANSLAMINAR	II/III to VI
AL 569_18	L	M	37-40	10	2	2	3	17	TRANSLAMINAR	II/III to VI
AL 572_2	R	SS	35-37	6	2	4	1	13	TRANSLAMINAR	II/III to VI
AL 572_10	R	Au	66-72	8	4	12	2	26	TRANSLAMINAR	II/III to VI
AL 572_13	L	Cg	29-34	4	2	9	6	21	TRANSLAMINAR	II/III to VI
AL 572_16	L	M	35-40	2	0	7	7	16	TRANSLAMINAR	II/III-V-VI
AL 572_22	L	Vi	45-47	4	5	6	2	17	TRANSLAMINAR	II/III to VI
AL 572_23	L	VM	47-51	10	7	5	12	34	TRANSLAMINAR	II/III to VI
AL 572_26	L	Vi	55-57	2	1	6	4	13	TRANSLAMINAR	II/III to VI
AL 572_27	L	VM	60-64	8	7	4	3	22	TRANSLAMINAR	II/III to VI
AL 682_4	L	SS	37-38	3	2	5	3	13	TRANSLAMINAR	II/III to VI
AL 682_5	R	Cg	12 to 17	12	0	5	2	19	TRANSLAMINAR	II/III-V-VI
AL 682_6	R	SS	16-20	5	1	1	8	15	TRANSLAMINAR	II/III to VI
AL 682_18	R	RSD	55-57	10	0	7	3	20	TRANSLAMINAR	II/III-V-VI
AL 682_19	R	Vi	57-62	31	8	9	17	65	TRANSLAMINAR	II/III to VI
AL 692_2	R	SS	35-41	3	12	2	2	19	TRANSLAMINAR	II/III to VI
AL 692_3	R	M	37-44	14	6	1	4	25	TRANSLAMINAR	II/III to VI
AL 692_5	R	SS	42-44	6	4	0	4	14	TRANSLAMINAR	II/III-IV-VI
AL 692_7	R	RSD	48-50	13	0	5	7	25	TRANSLAMINAR	II/III-V-VI
AL 692_11	R	SS	53-57	7	5	4	3	19	TRANSLAMINAR	II/III to VI
AL 692_13	R	Au	67-73	8	2	4	8	22	TRANSLAMINAR	II/III to VI
AL 723_10	L	VM	48-52	8	2	5	5	20	TRANSLAMINAR	II/III to VI
AL 723_12	L	VM	56-61	13	6	16	6	41	TRANSLAMINAR	II/III to VI
AL 723_13	L	Vi	56-58	3	1	3	6	13	TRANSLAMINAR	II/III to VI
AL 724_4	R	Vi	60-62	10	8	11	3	32	TRANSLAMINAR	II/III to VI
AL 728_1	R	SS	27-31	10	5	0	4	19	TRANSLAMINAR	II/III-IV-VI
AL 728_6	L	M	40-42	10	2	3	9	24	TRANSLAMINAR	II/III to VI
