# Supplementary material for: A stochastic framework of neurogenesis underlies the assembly of neocortical cytoarchitecture
Source: eLife. 2019 Nov 18;8:e51381. doi: 10.7554/eLife.51381 (PMC6968929; doi:10.7554/eLife.51381)
Supplement: Figure 5—figure supplement 2—source data 1. [file elife-51381-fig5-figsupp2-data1.xlsx]

## Sheet: Sheet1
			Tle4-				Tle4 +
Picture	Tle4+	Tle4 -	# Fucci only	# Fucci-Satb2	# Fucci-Ctip2	# Fucci-Satb2-Ctip2	# Fucci-Tle4	# Fucci-Tle4-Ctip2	# Fucci-Tle4-Satb2	# Fucci-Tle4-Ctip2-Satb2
AL 251_M_1	25	5	1	1	2	1	1	15	1	8
AL 251_M_2	13	18	2	7	4	5	0	9	0	4
AL 251_M_3	19	20	5	2	8	5	0	11	0	8
AL 251_M_4	11	22	7	6	1	8	1	10	0	0
AL 251_M_5	19	22	1	4	8	9	4	13	0	2
AL 251_SS_1	47	34	7	20	4	3	7	32	5	3
AL 251_SS_2	32	35	11	24	0	0	4	17	6	5
AL 251_SS_3	35	17	6	9	1	1	2	24	3	6
AL 251_SS_4	23	24	11	10	1	2	2	19	0	2
AL 251_SS_5	34	17	4	11	1	1	4	17	3	10
AL 251_V_1	26	15	8	4	1	2	2	16	2	6
AL 251_V_2	12	19	8	10	0	1	0	12	0	0
AL 251_V_3	25	9	5	4	0	0	2	16	1	6
AL 251_V_4	16	24	7	4	6	7	0	13	1	2
AL 251_V_5	9	13	5	6	0	2	0	8	0	1
Total	346	294	88	122	37	47	29	232	22	63
AL 254_M_1	15	23	4	9	9	1	1	9	0	5
AL 254_M_2	10	12	6	1	1	4	2	3	1	4
AL 254_M_3	6	7	1	1	5	0	0	5	0	1
AL 254_M_4	18	14	4	3	7	0	0	17	0	1
AL 254_M_5	10	14	3	4	4	3	1	6	0	3
AL 254_SS_1	17	18	2	9	6	1	1	13	1	2
AL 254_SS_2	16	18	8	6	4	0	1	14	1	0
AL 254_SS_3	20	18	10	3	5	0	4	15	0	1
AL 254_SS_4	15	9	3	3	0	3	-1	12	1	3
AL 254_SS_5	26	22	3	10	5	4	1	13	1	11
AL 254_V_1	12	15	4	6	5	0	2	10	0	0
AL 254_V_2	15	12	0	7	4	1	1	11	0	3
AL 254_V_3	12	19	3	13	0	3	0	6	0	6
AL 254_V_4	23	31	1	8	15	7	2	21	0	0
AL 254_V_5	11	25	8	10	5	2	0	9	0	2
Total	226	257	60	93	75	29	15	164	5	42
