# Supplementary material for: A stochastic framework of neurogenesis underlies the assembly of neocortical cytoarchitecture
Source: eLife. 2019 Nov 18;8:e51381. doi: 10.7554/eLife.51381 (PMC6968929; doi:10.7554/eLife.51381)
Supplement: Figure 5—figure supplement 3—source data 1. [file elife-51381-fig5-figsupp3-data1.xlsx]

## Sheet: All lineages (>2 cells)
LINEAGE ID	AREA	SECTIONS	II/III-IV	V	VI	TOT	LINEAGE TYPE	Layers
17.27.5_1	F	1.3.1	4	3	6	13	TRANSLAMINAR	II/III to VI
17.27.5_2	M	1.4.2	1	1		2	TRANSLAMINAR	II/III to VI
17.27.5_3	M	1.5.2	12	13	5	30	TRANSLAMINAR	II/III to VI
17.27.5_4	SS	2.2.2	5	1	1	7	TRANSLAMINAR	II/III to VI
17.27.5_5	SS	2.2.3	0	1	0	1	DEEP	V
17.27.5_6	SS	2.3.2	0	0	5	5	DEEP	VI
17.27.5_7	SS	2.3.3.	3	1	1	5	TRANSLAMINAR	II/III to VI
17.27.5_8	SS	2.4.1	14	2	2	18	TRANSLAMINAR	II/III to VI
17.27.5_9	SS	3.1.2.	2	5	1	8	TRANSLAMINAR	II/III to VI
17.27.5_10	AU	3.2.2	3	2	4	9	TRANSLAMINAR	II/III to VI
17.27.5_11	VI	3.2.3.	3	0	2	5	TRANSLAMINAR	II/III-IV-VI
17.27.5_12	VI	3.3.1.	0	0	2	2	DEEP	VI
17.27.5_13	VI	3.4.3	7	5	4	16	TRANSLAMINAR	II/III to VI
17.27.5_14	VI	3.4.2	4	1	1	6	TRANSLAMINAR	II/III to VI
17.27.1_1	F	1.2.2	15	7	0	22	TRANSLAMINAR	II/III to V
17.27.1_2	F	1.2.4	4	3	1	8	TRANSLAMINAR	II/III to VI
17.27.1_3	F	1.3.3	21	10	6	37	TRANSLAMINAR	II/III to VI
17.27.1_4	M	1.3.3	3	0	0	3	SUPERFICIAL	II/III-IV
17.27.1_5	SS	1.3.4	4	2	8	14	TRANSLAMINAR	II/III to VI
17.27.1_6	SS	1.4.4	5	0	0	5	SUPERFICIAL	II/III-IV
17.27.1_7	SS	1.4.4	11	2	2	15	TRANSLAMINAR	II/III to VI
17.27.1_8	SS	1.5.4	8	3	2	13	TRANSLAMINAR	II/III to VI
17.27.1_9	SS	2.2.2	13	4	4	21	TRANSLAMINAR	II/III to VI
17.27.1_10	SS	2.2.3	16	8	9	33	TRANSLAMINAR	II/III to VI
17.27.1_11	AU	2.2.3	3	3	2	8	TRANSLAMINAR	II/III to VI
17.27.1_12	AU	2.3.3	4	2	0	6	TRANSLAMINAR	II/III to V
17.27.1_13	VI	2.3.3	29	4	2	35	TRANSLAMINAR	II/III to VI
17.27.1_14	VI	2.4.2	3	2	1	6	TRANSLAMINAR	II/III to VI
17.27.1_15	VI	3.1.3	3	0	0	3	SUPERFICIAL	II/III-IV
17.31.2S_1	F	1.1.2	3	0	0	3	SUPERFICIAL	II/III-IV
17.31.2S_2	F	1.1.2	1	2	0	3	TRANSLAMINAR	II/III to V
17.31.2S_3	F	1.1.4	7	1	2	10	TRANSLAMINAR	II/III to VI
17.31.2S_4	M	1.2.4	5	2	0	7	TRANSLAMINAR	II/III to V
17.31.2S_5	SS	1.3.4	2	1	1	4	TRANSLAMINAR	II/III to VI
17.31.2S_6	M	1.4.3	8	2	2	12	TRANSLAMINAR	II/III to VI
17.31.2S_7	SS	1.6.2	4	3	0	7	TRANSLAMINAR	II/III to V
17.31.2S_8	Au	2.2.3	4	2	0	6	TRANSLAMINAR	II/III to V
17.31.2S_9	M	2.2.1	2	1	0	3	TRANSLAMINAR	II/III to V
17.31.2S_10	SS	2.2.2	6	2	1	9	TRANSLAMINAR	II/III to VI
17.31.2S_11	SS	2.3.3	7	3	1	11	TRANSLAMINAR	II/III to VI
17.31.2S_12	Vi	2.5.3	9	0	2	11	TRANSLAMINAR	II/III-IV-VI
17.31.2S_13	Vi	2.5.4.	6	2	0	8	TRANSLAMINAR	II/III to V
17.31.4_1	SS	2.1.1.	3	2	2	7	TRANSLAMINAR	II/III to VI
17.31.4_2	M	1.2.1	9	4	1	14	TRANSLAMINAR	II/III to VI
17.31.4_3	M	1.2.2	0	9	1	10	DEEP	V-VI
17.31.4_4	M	1.3.2	3	0	3	6	TRANSLAMINAR	II/III-IV-VI
17.31.4_5	M	1.3.2	0	0	2	2	DEEP	VI
17.31.4_6	SS	1.3.3	3	5	0	8	TRANSLAMINAR	II/III to V
17.31.4_7	SS	1.4.1	11	6	3	20	TRANSLAMINAR	II/III to VI
17.31.4_8	M	1.4.2	3	1	2	6	TRANSLAMINAR	II/III to VI
17.31.4_9	SS	1.5.3	3	1	1	5	TRANSLAMINAR	II/III to VI
17.31.4_10	M	2.1.1	21	1	4	26	TRANSLAMINAR	II/III to VI
17.31.4_11	SS	2.1.3	4	1	0	5	TRANSLAMINAR	II/III to V
17.31.4_12	SS	2.1.3	0	2	1	3	DEEP	V-VI
17.31.4_13	M	2.1.2	8	0	1	9	TRANSLAMINAR	II/III-IV-VI
17.31.4_14	SS	2.1.4	11	1	2	14	TRANSLAMINAR	II/III to VI
17.31.4_15	SS	2.2.3	3	2	0	5	TRANSLAMINAR	II/III to V
17.31.4_16	SS	2.2.4	16	5	9	30	TRANSLAMINAR	II/III to VI
17.31.4_17	SS	2.2.3	4	2	2	8	TRANSLAMINAR	II/III to VI
17.31.4_18	SS	2.2.4	5	2	2	9	TRANSLAMINAR	II/III to VI
17.31.4_19	SS	2.4.2	13	6	3	22	TRANSLAMINAR	II/III to VI
AL 529_1	M	13-16	14	1	1	16	TRANSLAMINAR	II/III to VI
AL 529_2	Cg	13	4	0	0	4	SUPERFICIAL	II/III-IV
AL 529_3	M	19-22	5	2	10	17	TRANSLAMINAR	II/III to VI
AL 529_4	M	19-21	7	1	9	17	TRANSLAMINAR	II/III to VI
AL 529_5	VM	25-29	6	1	2	9	TRANSLAMINAR	II/III to VI
AL 529_6	Vi	29-32	7	2	12	21	TRANSLAMINAR	II/III to VI
AL 529_7	Vi	33-35	7	3	0	10	TRANSLAMINAR	II/III to V
AL 529_8	SS	9 TO 11	4	0	2	6	TRANSLAMINAR	II/III-IV-VI
AL 529_9	M	17-19	16	3	4	23	TRANSLAMINAR	II/III to VI
AL 529_10	SS	21-22	1	2	3	6	TRANSLAMINAR	II/III to VI
AL 529_11	Au	25-26	1	2	3	6	TRANSLAMINAR	II/III to VI
AL 531_1	Cg	12	3	0	0	3	SUPERFICIAL	II/III-IV
AL 531_2	SS	12 TO 15	4	2	3	9	TRANSLAMINAR	II/III to VI
AL 531_3	SS	12 TO 13	0	2	1	3	DEEP	V-VI
AL 531_4	M	16-19	9	2	1	12	TRANSLAMINAR	II/III to VI
AL 531_5	SS	16-21	15	3	4	22	TRANSLAMINAR	II/III to VI
AL 531_6	SS	17-21	10	2	2	14	TRANSLAMINAR	II/III to VI
AL 531_7	SS	19-22	10	1	1	12	TRANSLAMINAR	II/III to VI
AL 531_8	SS	22-25	0	0	3	3	DEEP	VI
AL 531_9	VM	29-32	10	0	1	11	TRANSLAMINAR	II/III-IV-VI
AL 801_1	Cg	10	3	0	0	3	SUPERFICIAL	II/III-IV
AL 801_2	Cg	10 to 14	11	14	7	32	TRANSLAMINAR	II/III to VI
AL 801_3	SS	18-20	7	3	0	10	TRANSLAMINAR	II/III to V
AL 801_4	SS		12	1	3	16	TRANSLAMINAR	II/III to VI
AL 801_5	Au	23-24	2	3	2	7	TRANSLAMINAR	II/III to VI
AL 801_6	RSD	28-31	21	5	0	26	TRANSLAMINAR	II/III to V
AL 801_7	M	16-19	4	2	5	11	TRANSLAMINAR	II/III to VI
AL 801_8	M	16-19	4	2	5	11	TRANSLAMINAR	II/III to VI
AL 801_9	Vi	24	4	1	0	5	TRANSLAMINAR	II/III to V
AL 801_10	SS	24	6	4	2	12	TRANSLAMINAR	II/III to VI
AL 801_11	VM	26-28	9	0	8	17	TRANSLAMINAR	II/III-IV-VI
AL 804_1	M	12 to 15	25	3	11	39	TRANSLAMINAR	II/III to VI
AL 804_2	Cg	14-19	9	3	4	16	TRANSLAMINAR	II/III to VI
AL 804_3	Cg	15	2	1	3	6	TRANSLAMINAR	II/III to VI
AL 804_4	M	21-22	8	1	1	10	TRANSLAMINAR	II/III to VI
AL 804_5	SS	22-26	4	3	3	10	TRANSLAMINAR	II/III to VI
AL 804_6	Vi	27-28	6	0	1	7	TRANSLAMINAR	II/III-IV-VI
AL 804_7	VM	28-29	14	1	6	21	TRANSLAMINAR	II/III to VI
AL 804_8	RSD	30-32	5	3	7	15	TRANSLAMINAR	II/III to VI
AL 804_9	Vi	30-32	12	4	8	24	TRANSLAMINAR	II/III to VI
AL 805_1	M	16-18	19	4	7	30	TRANSLAMINAR	II/III to VI
AL 805_2	SS	19-20	5	1	2	8	TRANSLAMINAR	II/III to VI
AL 805_3	SS	20-23	10	0	0	10	SUPERFICIAL	II/III-IV
AL 805_4	Au	24	2	0	1	3	TRANSLAMINAR	II/III-IV-VI
AL 805_5	Cg	24-25	4	3	0	7	TRANSLAMINAR	II/III to V
AL 805_6	VM	25-27	9	1	8	18	TRANSLAMINAR	II/III to VI
AL 805_7	Vi	29-30	11	2	10	23	TRANSLAMINAR	II/III to VI
AL 805_8	RSD	29-30	3	0	0	3	SUPERFICIAL	II/III-IV
AL 805_9	VM	31-33	4	3	9	16	TRANSLAMINAR	II/III to VI
AL 805_10	Cg	11 to 13	8	2	7	17	TRANSLAMINAR	II/III to VI
AL 805_11	M	12 to 15	7	2	3	12	TRANSLAMINAR	II/III to VI
AL 805_12	M	23-25	2	0	1	3	TRANSLAMINAR	II/III-IV-VI
AL 805_13	M	23-29	11	6	4	21	TRANSLAMINAR	II/III to VI
AL 805_14	RSG	27-29	6	3	0	9	TRANSLAMINAR	II/III to V
AL 805_15	SS	27-32	21	4	9	34	TRANSLAMINAR	II/III to VI
AL 805_16	Au	30-31	13	7	4	24	TRANSLAMINAR	II/III to VI
AL 805_17	RSD	30-34	63	14	26	103	TRANSLAMINAR	II/III to VI
AL 805_18	RSG	31-35	15	3	8	26	TRANSLAMINAR	II/III to VI
AL 805_19	Vi	37-40	51	11	19	81	TRANSLAMINAR	II/III to VI
AL 805_20	RSD	39-41	3	3	3	9	TRANSLAMINAR	II/III to VI
Al 806_1	SS	11 to 12	5	2	0	7	TRANSLAMINAR	II/III to VI
Al 806_2	M	21-22	7	0	3	10	TRANSLAMINAR	II/III-IV-VI
Al 806_3	RSG	35-37	29	9	0	38	TRANSLAMINAR	II/III to V
Al 806_4	Vi	39	4	0	0	4	TRANSLAMINAR	II/III-IV
Al 806_5	M	19	7	4	7	18	TRANSLAMINAR	II/III to VI
Al 806_6	SS	30-32	3	0	4	7	TRANSLAMINAR	II/III-IV-VI
Al 806_7	VM	36	6	1	0	7	TRANSLAMINAR	II/III to V
AL 807_1	SS	9 to 10	4	1	2	7	TRANSLAMINAR	II/III to VI
AL 807_2	M	10	2	1	0	3	TRANSLAMINAR	II/III to V
AL 807_3	M	11 to 14	7	2	3	12	TRANSLAMINAR	II/III to VI
AL 807_4	Cg	11 to 12	5	0	3	8	TRANSLAMINAR	II/III-IV-VI
AL 807_5	Cg	16-17	2	5	2	9	TRANSLAMINAR	II/III to VI
AL 807_6	SS	19	3	1	0	4	TRANSLAMINAR	II/III to V
AL 807_7	SS	19-20	13	3	4	20	TRANSLAMINAR	II/III to VI
AL 807_8	SS	21-22	14	3	6	23	TRANSLAMINAR	II/III to VI
AL 807_9	SS	25-27	3	3	2	8	TRANSLAMINAR	II/III to VI
AL 807_10	Au	30	2	1	0	3	TRANSLAMINAR	II/III to V
AL 807_11	SS	32-33	4	0	1	5	TRANSLAMINAR	II/III-IV-VI
AL 807_12	Vi	33-34	4	2	0	6	TRANSLAMINAR	II/III to V
AL 807_13	Vi	33	3	0	1	4	TRANSLAMINAR	II/III-IV-VI
AL 807_14	VM	33-34	13	10	12	35	TRANSLAMINAR	II/III to VI
AL 807_15	M	12 to 15	4	2	3	9	TRANSLAMINAR	II/III to VI
AL 807_16	Cg	13-14	2	3	1	6	TRANSLAMINAR	II/III to VI
AL 807_17	M	14-16	14	12	18	44	TRANSLAMINAR	II/III to VI
AL 807_18	SS	23-25	20	6	9	35	TRANSLAMINAR	II/III to VI
AL 807_19	RSD	24-26	4	3	5	12	TRANSLAMINAR	II/III to VI
AL 807_20	SS	28-29	5	2	2	9	TRANSLAMINAR	II/III to VI
AL 807_21	RSD	28-31	8	2	3	13	TRANSLAMINAR	II/III to VI
AL 807_22	Au	30-33	4	5	2	11	TRANSLAMINAR	II/III to VI
AL 807_23	VM	32-33	7	1	1	9	TRANSLAMINAR	II/III to VI
AL 807_24	Vi	32-34	7	2	4	13	TRANSLAMINAR	II/III to VI
AL 807_25	RSD	34	3	0	0	3	SUPERFICIAL	II/III-IV
AL 808_1	M	17-18	3	0	4	7	TRANSLAMINAR	II/III-IV-VI
AL 808_2	SS	25	3	1	0	4	TRANSLAMINAR	II/III to V
AL 808_3	Au	27-28	0	0	3	3	DEEP	VI
AL 809_1	SS2	17-19	3	1	2	6	TRANSLAMINAR	AL
AL 809_2	M	18-20	6	0	1	7	TRANSLAMINAR	II/III-IV-VI
AL 809_3	SS	19-21	0	1	2	3	DEEP	V-VI
AL 809_4	SS	21-22	4	2	1	7	TRANSLAMINAR	II/III to VI
AL 809_5	SS	23-24	8	5	6	19	TRANSLAMINAR	II/III to VI
AL 809_6	VM	25-26	3	2	2	7	TRANSLAMINAR	II/III to VI
AL 809_7	RSD	26-28	3	2	2	7	TRANSLAMINAR	II/III to VI
AL 809_8	VM	29-30	10	3	3	16	TRANSLAMINAR	II/III to VI
AL 809_9	Au	28-29	5	2	4	11	TRANSLAMINAR	II/III to VI
AL 809_10	Vi	29-31	5	3	3	11	TRANSLAMINAR	II/III to VI
AL 809_11	Au	29-30	5	2	2	9	TRANSLAMINAR	II/III to VI
AL 809_12	Cg	10 to 11	5	1	0	6	TRANSLAMINAR	II/III to V
AL 809_13	SS	20-21	0	0	3	3	DEEP	VI
AL 809_14	VM	28-29	4	2	3	9	TRANSLAMINAR	II/III to VI
AL 809_15	VM	32	13	3	11	27	TRANSLAMINAR	II/III to VI
AL 809_16	Au	33	4	0	2	6	TRANSLAMINAR	II/III-IV-VI

## Sheet: Neurogenic lineages (<13 cells)
LINEAGE ID	AREA	SECTIONS	II/III-IV	V	VI	TOT	LINEAGE TYPE	Layers
17.27.5_4	SS	2.2.2	5	1	1	7	TRANSLAMINAR	II/III to VI
17.27.5_6	SS	2.3.2			5	5	DEEP	VI
17.27.5_7	SS	2.3.3.	3	1	1	5	TRANSLAMINAR	II/III to VI
17.27.5_9	SS	3.1.2.	2	5	1	8	TRANSLAMINAR	II/III to VI
17.27.5_10	AU	3.2.2	3	2	4	9	TRANSLAMINAR	II/III to VI
17.27.5_11	VI	3.2.3.	3	0	2	5	TRANSLAMINAR	II/III-IV-VI
17.27.5_14	VI	3.4.2	4	1	1	6	TRANSLAMINAR	II/III to VI
17.27.1_2	F	1.2.4	4	3	1	8	TRANSLAMINAR	II/III to VI
17.27.1_4	M	1.3.3	3	0	0	3	SUPERFICIAL	II/III-IV
17.27.1_6	SS	1.4.4	5	0	0	5	SUPERFICIAL	II/III-IV
17.27.1_11	AU	2.2.3	3	3	2	8	TRANSLAMINAR	II/III to VI
17.27.1_12	AU	2.3.3	4	2	0	6	TRANSLAMINAR	II/III to V
17.27.1_14	VI	2.4.2	3	2	1	6	TRANSLAMINAR	II/III to VI
17.27.1_15	VI	3.1.3	3	0	0	3	SUPERFICIAL	II/III-IV
17.31.2S_1	F	1.1.2	3	0	0	3	SUPERFICIAL	II/III-IV
17.31.2S_2	F	1.1.2	1	2	0	3	TRANSLAMINAR	II/III to V
17.31.2S_3	F	1.1.4	7	1	2	10	TRANSLAMINAR	II/III to VI
17.31.2S_4	M	1.2.4	5	2	0	7	TRANSLAMINAR	II/III to V
17.31.2S_5	SS	1.3.4	2	1	1	4	TRANSLAMINAR	II/III to VI
17.31.2S_6	M	1.4.3	8	2	2	12	TRANSLAMINAR	II/III to VI
17.31.2S_7	SS	1.6.2	4	3	0	7	TRANSLAMINAR	II/III to V
17.31.2S_8	Au	2.2.3	4	2	0	6	TRANSLAMINAR	II/III to V
17.31.2S_9	M	2.2.1	2	1	0	3	TRANSLAMINAR	II/III to V
17.31.2S_10	SS	2.2.2	6	2	1	9	TRANSLAMINAR	II/III to VI
17.31.2S_11	SS	2.3.3	7	3	1	11	TRANSLAMINAR	II/III to VI
17.31.2S_12	Vi	2.5.3	9	0	2	11	TRANSLAMINAR	II/III-IV-VI
17.31.2S_13	Vi	2.5.4.	6	2	0	8	TRANSLAMINAR	II/III to V
17.31.4_1	SS	2.1.1.	3	2	2	7	TRANSLAMINAR	II/III to VI
17.31.4_3	M	1.2.2	0	9	1	10	DEEP	V-VI
17.31.4_4	M	1.3.2	3	0	3	6	TRANSLAMINAR	II/III-IV-VI
17.31.4_6	SS	1.3.3	3	5	0	8	TRANSLAMINAR	II/III to V
17.31.4_8	M	1.4.2	3	1	2	6	TRANSLAMINAR	II/III to VI
17.31.4_9	SS	1.5.3	3	1	1	5	TRANSLAMINAR	II/III to VI
17.31.4_11	SS	2.1.3	4	1	0	5	TRANSLAMINAR	II/III to V
17.31.4_12	SS	2.1.3	0	2	1	3	DEEP	V-VI
17.31.4_13	M	2.1.2	8	0	1	9	TRANSLAMINAR	II/III-IV-VI
17.31.4_15	SS	2.2.3	3	2	0	5	TRANSLAMINAR	II/III to V
17.31.4_17	SS	2.2.3	4	2	2	8	TRANSLAMINAR	II/III to VI
17.31.4_18	SS	2.2.4	5	2	2	9	TRANSLAMINAR	II/III to VI
AL 529_2	Cg	13	4	0	0	4	SUPERFICIAL	II/III-IV
AL 529_5	VM	25-29	6	1	2	9	TRANSLAMINAR	II/III to VI
AL 529_7	Vi	33-35	7	3	0	10	TRANSLAMINAR	II/III to V
AL 529_8	SS	9 TO 11	4	0	2	6	TRANSLAMINAR	II/III-IV-VI
AL 529_10	SS	21-22	1	2	3	6	TRANSLAMINAR	II/III to VI
AL 529_11	Au	25-26	1	2	3	6	TRANSLAMINAR	II/III to VI
AL 531_1	Cg	12	3	0	0	3	SUPERFICIAL	II/III-IV
AL 531_2	SS	12 TO 15	4	2	3	9	TRANSLAMINAR	II/III to VI
AL 531_3	SS	12 TO 13	0	2	1	3	DEEP	V-VI
AL 531_4	M	16-19	9	2	1	12	TRANSLAMINAR	II/III to VI
AL 531_7	SS	19-22	10	1	1	12	TRANSLAMINAR	II/III to VI
AL 531_8	SS	22-25	0	0	3	3	DEEP	VI
AL 531_9	VM	29-32	10	0	1	11	TRANSLAMINAR	II/III-IV-VI
AL 801_1	Cg	10	3	0	0	3	SUPERFICIAL	II/III-IV
AL 801_3	SS	18-20	7	3	0	10	TRANSLAMINAR	II/III to V
AL 801_5	Au	23-24	2	3	2	7	TRANSLAMINAR	II/III to VI
AL 801_7	M	16-19	4	2	5	11	TRANSLAMINAR	II/III to VI
AL 801_9	Vi	24	4	1	0	5	TRANSLAMINAR	II/III to V
AL 801_10	SS	24	6	4	2	12	TRANSLAMINAR	II/III to VI
AL 804_3	Cg	15	2	1	3	6	TRANSLAMINAR	II/III to VI
AL 804_4	M	21-22	8	1	1	10	TRANSLAMINAR	II/III to VI
AL 804_5	SS	22-26	4	3	3	10	TRANSLAMINAR	II/III to VI
AL 804_6	Vi	27-28	6	0	1	7	TRANSLAMINAR	II/III-IV-VI
AL 805_2	SS	19-20	5	1	2	8	TRANSLAMINAR	II/III to VI
AL 805_3	SS	20-23	10	0	0	10	SUPERFICIAL	II/III-IV
AL 805_4	Au	24	2	0	1	3	TRANSLAMINAR	II/III-IV-VI
AL 805_5	Cg	24-25	4	3	0	7	TRANSLAMINAR	II/III to V
AL 805_8	RSD	29-30	3	0	0	3	SUPERFICIAL	II/III-IV
AL 805_11	M	12 to 15	7	2	3	12	TRANSLAMINAR	II/III to VI
AL 805_12	M	23-25	2	0	1	3	TRANSLAMINAR	II/III-IV-VI
AL 805_14	RSG	27-29	6	3	0	9	TRANSLAMINAR	II/III to V
AL 805_20	RSD	39-41	3	3	3	9	TRANSLAMINAR	II/III to VI
Al 806_1	SS	11 to 12	5	2	0	7	TRANSLAMINAR	II/III to VI
Al 806_2	M	21-22	7	0	3	10	TRANSLAMINAR	II/III-IV-VI
Al 806_4	Vi	39	4	0	0	4	TRANSLAMINAR	II/III-IV
Al 806_6	SS	30-32	3	0	4	7	TRANSLAMINAR	II/III-IV-VI
Al 806_7	VM	36	6	1	0	7	TRANSLAMINAR	II/III to V
AL 807_1	SS	9 to 10	4	1	2	7	TRANSLAMINAR	II/III to VI
AL 807_2	M	10	2	1	0	3	TRANSLAMINAR	II/III to V
AL 807_3	M	11 to 14	7	2	3	12	TRANSLAMINAR	II/III to VI
AL 807_4	Cg	11 to 12	5	0	3	8	TRANSLAMINAR	II/III-IV-VI
AL 807_5	Cg	16-17	2	5	2	9	TRANSLAMINAR	II/III to VI
AL 807_6	SS	19	3	1	0	4	TRANSLAMINAR	II/III to V
AL 807_9	SS	25-27	3	3	2	8	TRANSLAMINAR	II/III to VI
AL 807_10	Au	30	2	1	0	3	TRANSLAMINAR	II/III to V
AL 807_11	SS	32-33	4	0	1	5	TRANSLAMINAR	II/III-IV-VI
AL 807_12	Vi	33-34	4	2	0	6	TRANSLAMINAR	II/III to V
AL 807_13	Vi	33	3	0	1	4	TRANSLAMINAR	II/III-IV-VI
AL 807_15	M	12 to 15	4	2	3	9	TRANSLAMINAR	II/III to VI
AL 807_16	Cg	13-14	2	3	1	6	TRANSLAMINAR	II/III to VI
AL 807_19	RSD	24-26	4	3	5	12	TRANSLAMINAR	II/III to VI
AL 807_20	SS	28-29	5	2	2	9	TRANSLAMINAR	II/III to VI
AL 807_22	Au	30-33	4	5	2	11	TRANSLAMINAR	II/III to VI
AL 807_23	VM	32-33	7	1	1	9	TRANSLAMINAR	II/III to VI
AL 807_25	RSD	34	3	0	0	3	SUPERFICIAL	II/III-IV
AL 808_1	M	17-18	3	0	4	7	TRANSLAMINAR	II/III-IV-VI
AL 808_2	SS	25	3	1	0	4	TRANSLAMINAR	II/III to V
AL 808_3	Au	27-28	0	0	3	3	DEEP	VI
AL 809_1	SS2	17-19	3	1	2	6	TRANSLAMINAR	II/III to VI
AL 809_2	M	18-20	6	0	1	7	TRANSLAMINAR	II/III-IV-VI
AL 809_3	SS	19-21	0	1	2	3	DEEP	V-VI
AL 809_4	SS	21-22	4	2	1	7	TRANSLAMINAR	II/III to VI
AL 809_6	VM	25-26	3	2	2	7	TRANSLAMINAR	II/III to VI
AL 809_7	RSD	26-28	3	2	2	7	TRANSLAMINAR	II/III to VI
AL 809_9	Au	28-29	5	2	4	11	TRANSLAMINAR	II/III to VI
AL 809_10	Vi	29-31	5	3	3	11	TRANSLAMINAR	II/III to VI
AL 809_11	Au	29-30	5	2	2	9	TRANSLAMINAR	II/III to VI
AL 809_12	Cg	10 to 11	5	1	0	6	TRANSLAMINAR	II/III to V
AL 809_13	SS	20-21	0	0	3	3	DEEP	VI
AL 809_14	VM	28-29	4	2	3	9	TRANSLAMINAR	II/III to VI
AL 809_16	Au	33	4	0	2	6	TRANSLAMINAR	II/III-IV-VI
