# Supplementary material for: A stochastic framework of neurogenesis underlies the assembly of neocortical cytoarchitecture
Source: eLife. 2019 Nov 18;8:e51381. doi: 10.7554/eLife.51381 (PMC6968929; doi:10.7554/eLife.51381)
Supplement: Figure 5—source data 1. [file elife-51381-fig5-data1.xlsx]

## Sheet: All layer lineages projection
			LII/III Subtypes		LIV Subtypes		LV Subtypes				LVI Subtypes				Subtypes
Lineage ID	Lineage Type	Layers	Ctip2_L/Satb2_H	Others	Ctip2_L/Satb2_H	Ctip2_L/Satb2_L	Ctip2_H/Satb2_L	Ctip2_L/Satb2_H	Ctip2_H/Satb2_H	Ctip2_L/Satb2_L	Ctip2_H/Satb2_L	Ctip2_L/Satb2_H	Ctip2_H/Satb2_H	Ctip2_L/Satb2_L	CCPN	SCPN	CThPN	Layer V HPN	Types contained	Types corrected
AL 350_4	All Layers	II/III to VI	4	0	0	1	0	1	0	0	1	0	0	0	5	0	1	0	CCP_CThP	CCP_CThP
AL 362_2	All Layers	II/III to VI	3	0	1	0	0	2	0	0	1	0	0	2	8	0	1	0	CCP_CThP	CCP_CThP
AL 362_6	All Layers	II/III to VI	2	0	1	0	0	2	0	0	0	1	3	0	6	0	0	0	CCP	Excluded
AL 362_13	All Layers	II/III to VI	5	0	2	0	0	1	1	0	0	1	0	0	9	0	0	1	CCP_HP	CCP_HP
AL 364_17	All Layers	II/III to VI	4	0	3	0	1	1	0	0	0	1	1	0	9	1	0	0	CCP_SCP	Excluded
AL 364_20	All Layers	II/III to VI	1	0	3	0	0	4	0	0	0	0	1	0	8	0	0	0	CCP	Excluded
AL 364_23	All Layers	II/III to VI	2	0	1	0	0	0	2	0	0	0	2	0	3	0	0	2	CCP_HP	Excluded
AL 366_4	All Layers	II/III to VI	3	0	2	0	0	1	1	0	0	1	0	0	7	0	0	1	CCP_HP	Excluded
AL 366_8	All Layers	II/III to VI	3	0	1	0	0	1	0	0	0	1	0	0	6	0	0	0	CCP	CCP
AL 374_4	All Layers	II/III to VI	1	0	5	0	0	2	0	0	2	0	2	0	8	0	2	0	CCP_CThP	Excluded
AL 374_9	All Layers	II/III to VI	4	0	1	0	1	0	0	0	0	1	0	0	6	1	0	0	CCP_SCP	CCP_SCP
AL 374_13	All Layers	II/III to VI	4	0	1	1	0	1	0	0	1	1	1	1	8	0	1	0	CCP_CThP	Excluded
AL 374_32	All Layers	II/III to VI	1	0	1	0	0	0	1	0	0	0	0	1	3	0	0	1	CCP_HP	CCP_HP
AL 387_3	All Layers	II/III to VI	2	0	1	0	0	2	1	0	1	0	0	1	6	0	1	1	CCP_CThP_HP	CCP_CThP_HP
AL 387_12	All Layers	II/III to VI	4	0	2	0	0	2	0	0	0	1	0	0	9	0	0	0	CCP	CCP
AL 403_2	All Layers	II/III to VI	4	0	1	0	0	0	1	0	0	1	0	0	6	0	0	1	CCP_HP	CCP_HP
AL 403_4	All Layers	II/III to VI	1	0	1	0	1	1	1	0	1	0	0	0	3	1	1	1	CCP_SCP_CThP_HP	CCP_SCP_CThP_HP
AL 403_6	All Layers	II/III to VI	5	0	1	0	0	1	0	0	0	0	0	2	9	0	0	0	CCP	CCP
AL 403_7	All Layers	II/III to VI	2	0	1	0	3	1	1	0	1	0	0	1	5	3	1	1	CCP_SCP_CThP_HP	CCP_SCP_CThP_HP
AL 403_11	All Layers	II/III to VI	2	0	2	0	0	0	0	0	2	1	0	0	5	0	2	0	CCP_CThP	CCP_CThP
AL 403_17	All Layers	II/III to VI	2	0	2	0	1	1	0	0	1	0	0	1	6	1	1	0	CCP_SCP_CThP	CCP_SCP_CThP
AL 405_1	All Layers	II/III to VI	3	0	2	0	0	0	1	0	0	0	1	0	5	0	0	1	CCP_HP	Excluded
AL 405_2	All Layers	II/III to VI	1	0	1	0	1	0	1	0	0	0	1	0	2	1	0	1	CCP_SCP_HP	Excluded
AL 407_3	All Layers	II/III to VI	5	1	3	0	0	1	0	0	0	1	0	1	11	0	0	0	CCP	CCP
AL 407_16	All Layers	II/III to VI	3	0	2	0	0	2	0	0	2	0	1	0	7	0	2	0	CCP_CThP	Excluded
AL 454_8	All Layers	II/III to VI	3	0	5	0	0	1	0	0	0	1	2	0	10	0	0	0	CCP	-
AL 515_4	All Layers	II/III to VI	6	0	2	0	1	0	2	0	0	1	0	0	9	1	0	2	CCP_SCP_HP	CCP_SCP_HP
AL 534_2	All Layers	II/III to VI	3	0	1	0	0	1	0	0	1	0	1	0	5	0	1	0	CCP_CThP	Excluded
AL 534_6	All Layers	II/III to VI	1	0	2	1	0	1	0	0	0	1	1	0	5	0	0	0	CCP	Excluded
AL 534_18	All Layers	II/III to VI	3	1	1	0	0	0	1	1	0	1	1	0	5	0	0	1	CCP_HP	Excluded
AL 534_19	All Layers	II/III to VI	2	0	1	0	0	0	1	0	1	0	0	0	3	0	1	1	CCP_CThP_HP	CCP_CThP_HP
AL 538_4	All Layers	II/III to VI	7	0	3	0	0	1	0	0	0	1	0	0	12	0	0	0	CCP	CCP
AL 538_10	All Layers	II/III to VI	4	1	0	1	1	1	0	0	1	0	0	0	5	1	1	0	CCP_SCP_CThP	CCP_SCP_CThP
AL 542_2	All Layers	II/III to VI	2	0	1	0	2	2	1	0	0	0	0	3	8	2	0	1	CCP_SCP_HP	CCP_SCP_HP
AL 542_7	All Layers	II/III to VI	3	0	0	1	0	1	2	0	1	0	0	2	6	0	1	2	CCP_CThP_HP	CCP_CThP_HP
AL 569_2	All Layers	II/III to VI	2	0	2	0	1	1	0	0	0	1	0	0	6	1	0	0	CCP_SCP	CCP_SCP
AL 569_7	All Layers	II/III to VI	3	1	2	1	1	1	0	0	1	0	0	0	6	1	1	0	CCP_SCP_CThP	CCP_SCP_CThP
AL 569_11	All Layers	II/III to VI	5	0	2	0	2	0	0	0	0	1	0	0	8	2	0	0	CCP_SCP	Excluded
AL 572_6	All Layers	II/III to VI	3	0	4	0	0	1	0	0	0	1	1	0	9	0	0	0	CCP_HP	Excluded
AL 572_7	All Layers	II/III to VI	5	0	2	0	0	2	0	0	0	1	1	0	10	0	0	0	CCP	Excluded
AL 572_11	All Layers	II/III to VI	1	0	1	1	1	1	0	0	1	0	0	0	3	1	1	0	CCP_SCP_CThP	CCP_SCP_CThP
AL 572_20	All Layers	II/III to VI	4	1	1	0	0	1	0	0	0	0	1	0	6	0	0	0	CCP	Excluded
AL 572_21	All Layers	II/III to VI	4	0	1	1	1	1	0	0	1	0	0	1	7	1	1	0	CCP_SCP	Excluded
AL 572_25	All Layers	II/III to VI	5	0	1	0	0	2	1	0	1	0	0	0	8	0	1	1	CCP_CThP_HP	CCP_CThP_HP
AL 628_12	All Layers	II/III to VI	3	0	2	0	0	2	0	0	1	0	1	0	7	0	1	0	CCP	Excluded
AL 628_15	All Layers	II/III to VI	2	0	1	0	0	4	0	0	0	2	0	0	9	0	0	0	CCP	CCP
AL 723_4	All Layers	II/III to VI	6	0	1	0	1	1	0	0	1	0	1	0	8	1	1	0	CCP_SCP_CThP	Excluded
AL 723_7	All Layers	II/III to VI	3	0	2	0	1	0	1	0	0	1	2	0	6	1	0	1	CCP_SCP_HP	Excluded
AL 723_11	All Layers	II/III to VI	2	0	3	0	1	0	0	0	2	0	2	0	5	1	2	0	CCP_SCP_CThP	Excluded
