# Supplementary material for: A stochastic framework of neurogenesis underlies the assembly of neocortical cytoarchitecture
Source: eLife. 2019 Nov 18;8:e51381. doi: 10.7554/eLife.51381 (PMC6968929; doi:10.7554/eLife.51381)
Supplement: Figure 7—source data 1. [file elife-51381-fig7-data1.xlsx]

## Sheet: Fucci cell quantifiction
Slice ID	Brain	Area	# II/III	# IV	# V	# VI	% II/III	% IV	% V	% VI	Total	Total (imaris)	um2 II/III	um2 IV	um2 V	um2 VI
M_1	AL_254	M	1010	389	1016	1299	27.1944	10.4739	27.356	34.9758	3714	4148	555000	285000	708000	596000
M_2	AL_254	M	895	428	1087	1591	22.3694	10.6973	27.1682	39.7651	4001	4347	510000	336000	829000	849000
M_3	AL_254	M	1287	585	820	1620	29.8469	13.5668	19.0167	37.5696	4312	4663	618000	282000	574000	757000
M_4	AL_254	M	1362	892	727	2034	27.1585	17.7866	14.4965	40.5583	5015	5734	608000	330000	559000	896000
M_5	AL_254	M	993	510	744	1390	27.3027	14.0225	20.4564	38.2183	3637	4046	571000	321000	580000	667000
SS_1	AL_254	SS	1275	1052	870	2206	23.598	19.4707	16.1022	40.8292	5403	5943	551000	330000	506000	842000
SS_2	AL_254	SS	1226	1041	682	1458	27.8194	23.6215	15.4754	33.0837	4407	5110	592000	362000	541000	743000
SS_3	AL_254	SS	1314	994	785	2025	25.6741	19.4216	15.338	39.5662	5118	5489	580000	326000	526000	792000
SS_4	AL_254	SS	1603	1080	932	1784	29.6907	20.0037	17.2625	33.0432	5399	5800	633000	369000	545000	700000
SS_5	AL_254	SS	1108	1391	723	1970	21.3405	26.7912	13.9253	37.943	5192	5545	540000	466000	541000	839000
SS_6	AL_254	SS	1325	1021	975	1811	25.8184	19.8948	18.9984	35.2884	5132	5481	542000	376000	586000	704000
SS_7	AL_254	SS	1631	1588	1193	2267	24.4198	23.776	17.862	33.9422	6679	7137	523000	426000	567000	691000
SS_8	AL_254	SS	1030	1248	576	1407	24.1727	29.2889	13.518	33.0204	4261	4643	515000	435000	449000	622000
SS_9	AL_254	SS	1226	924	634	1573	28.1386	21.2073	14.5513	36.1028	4357	4779	564000	421000	448000	688000
Au_1	AL_254	Au	928	598	796	1125	26.922	17.3484	23.0925	32.6371	3447	3972	446000	285000	559000	510000
Au_2	AL_254	Au	748	625	780	1424	20.9114	17.4727	21.806	39.8099	3577	4081	397000	311000	480000	539000
Au_3	AL_254	Au	1066	866	632	1320	27.4459	22.2966	16.2719	33.9856	3884	4341	335000	300000	346000	461000
Au_4	AL_254	Au	815	469	322	627	36.498	21.0031	14.4201	28.0788	2233	3163	352000	282000	390000	395000
Au_5	AL_254	Au	844	561	792	923	27.0513	17.9808	25.3846	29.5833	3120	3451	357000	260000	428000	382000
Vi_1	AL_254	Vi	551	386	580	612	25.8807	18.1306	27.2428	28.7459	2129	3386	337000	251000	436000	369000
Vi_2	AL_254	Vi	1077	830	704	815	31.4361	24.2265	20.5487	23.7887	3426	3624	372000	262000	339000	291000
Vi_3	AL_254	Vi	833	737	633	691	28.7837	25.4665	21.8728	23.877	2894	3015	339000	280000	339000	301000
Vi_4	AL_254	Vi	924	804	650	937	27.8733	24.2534	19.6078	28.2655	3315	3584	335000	284000	350000	357000
Mean			1090.04	826.913	767.522	1430.83
Mean %			26.4876	20.0936	18.6504	34.7684	26.8251	20.3513	18.8372	33.9865
M_6	AL_251	M	1011	368	1264	1724	23.1509	8.42684	28.9444	39.4779	4367	4762	470000	233000	805000	794000
M_7	AL_251	M	1423	524	921	1824	30.3282	11.1679	19.6292	38.8747	4692	5071	684000	286000	658000	859000
M_8	AL_251	M	1051	466	990	1713	24.9052	11.0427	23.4597	40.5924	4220	4515	552000	286000	673000	813000
M_9	AL_251	M	1173	399	908	1337	30.7309	10.4532	23.7883	35.0275	3817	4803	685000	272000	700000	750000
M_10	AL_251	M	667	406	715	1098	23.1116	14.0679	24.7748	38.0457	2886	4386	601000	343000	703000	780000
SS_10	AL_251	SS	1282	989	670	1983	26.0357	20.0853	13.6068	40.2721	4924	5186	603000	351000	483000	819000
SS_11	AL_251	SS	1164	957	561	1670	26.7463	21.9899	12.8906	38.3732	4352	5493	586000	450000	551000	811000
SS_12	AL_251	SS	1199	1234	811	1786	23.837	24.5328	16.1233	35.507	5030	5350	580000	418000	529000	769000
SS_13	AL_251	SS	1308	1136	839	2062	24.4715	21.2535	15.6969	38.5781	5345	6048	609000	432000	525000	784000
SS_14	AL_251	SS	1250	1557	865	2021	21.9568	27.3494	15.1941	35.4997	5693	6037	603000	478000	551000	792000
SS_15	AL_251	SS	1204	998	600	1391	28.7145	23.8016	14.3096	33.1743	4193	4716	549000	398000	470000	695000
SS_16	AL_251	SS	1271	1301	722	1913	24.4094	24.9856	13.8659	36.739	5207	5623	523000	418000	483000	718000
SS_17	AL_251	SS	1221	1271	816	1947	23.235	24.1865	15.5281	37.0504	5255	5709	565000	383000	521000	731000
SS_18	AL_251	SS	1305	1063	843	2072	24.7019	20.1211	15.9568	39.2201	5283	5660	5.25e+56	326000	488000	748000
SS_19	AL_251	SS	1095	1108	585	1549	25.2479	25.5476	13.4886	35.7159	4337	4714	508000	370000	391000	653000
Au_6	AL_251	Au	1027	686	765	1451	26.139	17.4599	19.4706	36.9305	3929	4654	534000	339000	509000	622000
Au_7	AL_251	Au	854	589	643	1357	24.804	17.1072	18.6756	39.4133	3443	4304	500000	320000	487000	658000
Au_8	AL_251	Au	935	648	784	1008	27.7037	19.2	23.2296	29.8667	3375	3581	512000	3.4	5.34	516000
Au_9	AL_251	Au	997	754	796	1216	26.4948	20.0372	21.1533	32.3146	3763	3949	480000	339000	533000	514000
Vi_5	AL_251	Vi	1080	727	633	1078	30.6993	20.6652	17.9932	30.6424	3518	3718	435000	307000	378000	425000
Vi_6	AL_251	Vi	926	550	580	861	31.7449	18.855	19.8834	29.5166	2917	3134	456000	305000	405000	413000
Vi_7	AL_251	Vi	806	634	545	840	28.531	22.4425	19.292	29.7345	2825	3372	391000	276000	371000	349000
Vi_8	AL_251	Vi	1059	736	675	1064	29.966	20.8263	19.1002	30.1075	3534	3716	434000	286000	393000	398000
Vi_9	AL_251	Vi	1050	919	781	852	29.1505	25.5136	21.6824	23.6535	3602	3861	427000	302000	403000	319000
Mean			1098.25	834.167	763	1492.38
Mean %			26.225	19.919	18.2196	35.6363	26.534	19.6299	18.6557	35.1803
M_11	FK_16-25-158	M	868	413	1109	1497	22.3308	10.6252	28.531	38.513	3887	4060	571000	296000	887000	881000
M_12	FK_16-25-158	M	1108	515	983	1353	27.9869	13.0083	24.8295	34.1753	3959	4171	585000	321000	730000	731000
M_13	FK_16-25-158	M	1233	661	1131	1735	25.9034	13.8866	23.7605	36.4496	4760	4978	617000	314000	753000	844000
M_14	FK_16-25-158	M	1125	595	848	1849	25.4698	13.4707	19.1986	41.861	4417	5469	611000	317000	664000	904000
M_15	FK_16-25-158	M	1094	445	1014	1599	26.3487	10.7177	24.422	38.5116	4152	4663	628000	302000	732000	809000
SS_20	FK_16-25-158	SS	758	1102	619	1922	17.2234	25.0398	14.065	43.6719	4401	4625	512000	457000	550000	874000
SS_21	FK_16-25-158	SS	1132	990	682	1884	24.1468	21.1177	14.5478	40.1877	4688	4887	638000	371000	586000	906000
SS_22	FK_16-25-158	SS	1055	1140	757	1548	23.4444	25.3333	16.8222	34.4	4500	4693	629000	454000	586000	741000
SS_23	FK_16-25-158	SS	1169	1090	1056	1694	23.338	21.7608	21.0821	33.8191	5009	5317	622000	426000	736000	809000
SS_24	FK_16-25-158	SS	1154	1371	719	1639	23.633	28.077	14.7246	33.5654	4883	5177	622000	479000	546000	737000
SS_25	FK_16-25-158	SS	1053	879	881	1957	22.0755	18.4277	18.4696	41.0273	4770	5120	610000	403000	608000	869000
SS_26	FK_16-25-158	SS	970	1137	721	1627	21.7733	25.5219	16.1841	36.5208	4455	4879	664000	503000	620000	812000
SS_27	FK_16-25-158	SS	941	1160	728	1450	21.9911	27.1091	17.0133	33.8864	4279	4481	559000	470000	591000	746000
SS_28	FK_16-25-158	SS	1115	1023	605	1253	27.9029	25.6006	15.1401	31.3564	3996	4209	595000	470000	591000	746000
SS_29	FK_16-25-158	SS	1068	1158	693	1545	23.9247	25.9409	15.5242	34.6102	4464	4652	622000	469000	551000	733000
Au_10	FK_16-25-158	Au	973	668	605	1368	26.9231	18.4837	16.7405	37.8528	3614	3745	570000	411000	523000	728000
Au_11	FK_16-25-158	Au	946	432	807	1161	28.2726	12.9109	24.1184	34.6981	3346	3524	511000	286000	550000	685000
Au_12	FK_16-25-158	Au	838	514	780	762	28.9565	17.7609	26.9523	26.3303	2894	3345	455000	292000	545000	414000
Au_13	FK_16-25-158	Au	997	618	846	1235	26.9751	16.7208	22.8896	33.4145	3696	3909	535000	336000	565000	677000
Au_14	FK_16-25-158	Au	846	452	845	677	30	16.0284	29.9645	24.0071	2820	2974	419000	276000	550000	389000
Vi_10	FK_16-25-158	Vi	844	552	702	787	29.2548	19.1334	24.3328	27.279	2885	3684	442000	270000	469000	417000
Vi_11	FK_16-25-158	Vi	1011	890	684	903	28.9851	25.5161	19.6101	25.8888	3488	3623	464000	344000	438000	395000
Vi_12	FK_16-25-158	Vi	843	682	707	982	26.229	21.2197	21.9975	30.5538	3214	3474	452000	311000	434000	422000
Vi_13	FK_16-25-158	Vi	844	999	729	903	24.2878	28.7482	20.9784	25.9856	3475	3704	407000	345000	426000	384000
Vi_14	FK_16-25-158	Vi	1161	947	707	992	30.4965	24.8752	18.5711	26.0573	3807	3987	481000	354000	418000	431000
Mean			1005.84	817.32	798.32	1372.88					295018
Mean %			25.1815	20.4619	19.9862	34.3705	25.6476	20.6837	20.0808	33.5879
M_1	AL_254	M	1010	389	1016	1299					3714
M_2	AL_254	M	895	428	1087	1591					4001
M_3	AL_254	M	1287	585	820	1620					4312
M_4	AL_254	M	1362	892	727	2034					5015
M_5	AL_254	M	993	510	744	1390					3637
M_6	AL_251	M	1011	368	1264	1724					4367
M_7	AL_251	M	1423	524	921	1824					4692
M_8	AL_251	M	1051	466	990	1713					4220
M_9	AL_251	M	1173	399	908	1337					3817
M_10	AL_251	M	667	406	715	1098					2886
M_11	FK_16-25-158	M	868	413	1109	1497					3887
M_12	FK_16-25-158	M	1108	515	983	1353					3959
M_13	FK_16-25-158	M	1233	661	1131	1735					4760
M_14	FK_16-25-158	M	1125	595	848	1849					4417
M_15	FK_16-25-158	M	1094	445	1014	1599					4152
			16300	7596	14277	23663					61836
SS_1	AL_254	SS	1275	1052	870	2206					5403
SS_2	AL_254	SS	1226	1041	682	1458					4407
SS_3	AL_254	SS	1314	994	785	2025					5118
SS_4	AL_254	SS	1603	1080	932	1784					5399
SS_5	AL_254	SS	1108	1391	723	1970					5192
SS_6	AL_254	SS	1325	1021	975	1811					5132
SS_7	AL_254	SS	1631	1588	1193	2267					6679
SS_8	AL_254	SS	1030	1248	576	1407					4261
SS_9	AL_254	SS	1226	924	634	1573					4357
SS_10	AL_251	SS	1282	989	670	1983					4924
SS_11	AL_251	SS	1164	957	561	1670					4352
SS_12	AL_251	SS	1199	1234	811	1786					5030
SS_13	AL_251	SS	1308	1136	839	2062					5345
SS_14	AL_251	SS	1250	1557	865	2021					5693
SS_15	AL_251	SS	1204	998	600	1391					4193
SS_16	AL_251	SS	1271	1301	722	1913					5207
SS_17	AL_251	SS	1221	1271	816	1947					5255
SS_18	AL_251	SS	1305	1063	843	2072					5283
SS_19	AL_251	SS	1095	1108	585	1549					4337
SS_20	FK_16-25-158	SS	758	1102	619	1922					4401
SS_21	FK_16-25-158	SS	1132	990	682	1884					4688
SS_22	FK_16-25-158	SS	1055	1140	757	1548					4500
SS_23	FK_16-25-158	SS	1169	1090	1056	1694					5009
SS_24	FK_16-25-158	SS	1154	1371	719	1639					4883
SS_25	FK_16-25-158	SS	1053	879	881	1957					4770
SS_26	FK_16-25-158	SS	970	1137	721	1627					4455
SS_27	FK_16-25-158	SS	941	1160	728	1450					4279
SS_28	FK_16-25-158	SS	1115	1023	605	1253					3996
SS_29	FK_16-25-158	SS	1068	1158	693	1545					4464
			34452	33003	22143	51414					141012
Au_1	AL_254	Au	928	598	796	1125					3447
Au_2	AL_254	Au	748	625	780	1424					3577
Au_3	AL_254	Au	1066	866	632	1320					3884
Au_4	AL_254	Au	815	469	322	627					2233
Au_5	AL_254	Au	844	561	792	923					3120
Au_6	AL_251	Au	1027	686	765	1451					3929
Au_7	AL_251	Au	854	589	643	1357					3443
Au_8	AL_251	Au	935	648	784	1008					3375
Au_9	AL_251	Au	997	754	796	1216					3763
Au_10	FK_16-25-158	Au	973	668	605	1368					3614
Au_11	FK_16-25-158	Au	946	432	807	1161					3346
Au_12	FK_16-25-158	Au	838	514	780	762					2894
Au_13	FK_16-25-158	Au	997	618	846	1235					3696
Au_14	FK_16-25-158	Au	846	452	845	677					2820
			12814	8480	10193	15654					47141
Vi_1	AL_254	Vi	551	386	580	612					2129
Vi_2	AL_254	Vi	1077	830	704	815					3426
Vi_3	AL_254	Vi	833	737	633	691					2894
Vi_4	AL_254	Vi	924	804	650	937					3315
Vi_5	AL_251	Vi	1080	727	633	1078					3518
Vi_6	AL_251	Vi	926	550	580	861					2917
Vi_7	AL_251	Vi	806	634	545	840					2825
Vi_8	AL_251	Vi	1059	736	675	1064					3534
Vi_9	AL_251	Vi	1050	919	781	852					3602
Vi_10	FK_16-25-158	Vi	844	552	702	787					2885
Vi_11	FK_16-25-158	Vi	1011	890	684	903					3488
Vi_12	FK_16-25-158	Vi	843	682	707	982					3214
Vi_13	FK_16-25-158	Vi	844	999	729	903					3475
Vi_14	FK_16-25-158	Vi	1161	947	707	992					3807
			13009	10393	9310	12317					45029

## Sheet: Corrected(subplate sustraction)
SSCx										ViCx
Slice ID	Brain	Area	# II/III	# IV	# V	# VI	# VI+SP	# SP		Slice ID	Brain	Area	# II/III	# IV	# V	# VI	# VI+SP	# SP
SS_1	AL_254	SS	1275	1052	870	1907	2206	299		Vi_1	AL_254	Vi	551	386	580	443	612	169
SS_2	AL_254	SS	1226	1041	682	1132	1458	326		Vi_2	AL_254	Vi	1077	830	704	675	815	140
SS_3	AL_254	SS	1314	994	785	1724	2025	301		Vi_3	AL_254	Vi	833	737	633	522	691	169
SS_4	AL_254	SS	1603	1080	932	1394	1784	390		Vi_4	AL_254	Vi	924	804	650	806	937	131
SS_5	AL_254	SS	1108	1391	723	1633	1970	337				Mean (#)	846.25	689.25	641.75	611.5
SS_6	AL_254	SS	1325	1021	975	1330	1811	481				Mean (%)	30.3451	24.7154	23.0121	21.9274	100
SS_7	AL_254	SS	1631	1588	1193	1958	2267	309
SS_8	AL_254	SS	1030	1248	576	1226	1407	181		Vi_5	AL_251	Vi	1080	727	633	921	1078	157
		Mean (#)	1314	1176.88	842	1538				Vi_6	AL_251	Vi	926	550	580	717	861	144
		Mean (%)	26.9767	24.1615	17.2864	31.5754				Vi_7	AL_251	Vi	806	634	545	683	840	157
										Vi_8	AL_251	Vi	1059	736	675	870	1064	194
SS_10	AL_251	SS	1282	989	670	1680	1983	303		Vi_9	AL_251	Vi	1050	919	781	726	852	126
SS_11	AL_251	SS	1164	957	561	1249	1670	421				Mean (#)	984.2	713.2	642.8	783.4
SS_12	AL_251	SS	1199	1234	811	1319	1786	467				Mean (%)	31.5085	22.8326	20.5788	25.08	100
SS_13	AL_251	SS	1308	1136	839	1623	2062	439
SS_14	AL_251	SS	1250	1557	865	1541	2021	480		Vi_10	FK_16-25-158	Vi	844	552	702	650	787	137
SS_15	AL_251	SS	1204	998	600	1061	1391	330		Vi_11	FK_16-25-158	Vi	1011	890	684	754	903	149
SS_16	AL_251	SS	1271	1301	722	1479	1913	434		Vi_12	FK_16-25-158	Vi	843	682	707	810	982	172
SS_17	AL_251	SS	1221	1271	816	1585	1947	362		Vi_13	FK_16-25-158	Vi	844	999	729	702	903	201
SS_18	AL_251	SS	1305	1063	843	1723	2072	349		Vi_14	FK_16-25-158	Vi	1161	947	707	826	992	166
SS_19	AL_251	SS	1095	1108	585	1338	1549	211				Mean (#)	940.6	814	705.8	748.4
		Mean (#)	1229.9	1161.4	731.2	1459.8						Mean (%)	29.3131	25.3677	21.9958	23.3234	100
		Mean (%)	26.8402	25.3454	15.9571	31.8574
												Gmean (%)	30.3889	24.3052	21.8622	23.4436
SS_20	FK_16-25-158	SS	758	1102	619	1598	1922	324				Std (%)	1.09834	1.31638	1.22213	1.57976
SS_21	FK_16-25-158	SS	1132	990	682	1884	1884	243
SS_22	FK_16-25-158	SS	1055	1140	757	1548	1548	261
SS_23	FK_16-25-158	SS	1169	1090	1056	1694	1694	314
SS_24	FK_16-25-158	SS	1154	1371	719	1639	1639	391
SS_25	FK_16-25-158	SS	1053	879	881	1957	1957	275
SS_27	FK_16-25-158	SS	941	1160	728	1450	1450	226
SS_28	FK_16-25-158	SS	1115	1023	605	1253	1253	205
SS_29	FK_16-25-158	SS	1068	1158	693	1545	1545	250
		Mean (#)	1049.44	1101.44	748.889	1618.67
		Mean (%)	23.2258	24.3766	16.574	35.8235
		Gmean (%)	25.6809	24.6278	16.6058	33.0854
		Std (%)	2.12728	0.630646	0.665255	2.37544
